# Supplementary material for: Women’s psychological experiences of physiological childbirth: a meta-synthesis
Source: PubMed Central journal article supplement — BMJ Open. 2018 Oct 18;8(10):e020347. doi: 10.1136/bmjopen-2017-020347 (PMC6196808; doi:10.1136/bmjopen-2017-020347), 2018-10-18
Supplement: bmjopen-2017-020347.draft_revisions.pdf [file bmjopen-2017-020347.draft_revisions.pdf]

# BMJ Open

BMJ Open is committed to open peer review. As part of this commitment we make the peer review history of every article we publish publicly available.

When an article is published we post the peer reviewers' comments and the authors' responses online. We also post the versions of the paper that were used during peer review. These are the versions that the peer review comments apply to.

The versions of the paper that follow are the versions that were submitted during the peer review process. They are not the versions of record or the final published versions. They should not be cited or distributed as the published version of this manuscript.

BMJ Open is an open access journal and the full, final, typeset and author-corrected version of record of the manuscript is available on our site with no access controls, subscription charges or pay-per-view fees (<http://bmjopen.bmj.com>).

If you have any questions on BMJ Open's open peer review process please email [info.bmjopen@bmj.com](mailto:info.bmjopen@bmj.com)

# BMJ Open

## WOMEN ' S PSYCHOLOGICAL EXPERIENCES OF PHYSIOLOGICAL CHILDBIRTH: A META SYNTHESIS

|                               |                                                                                                                                                                                                                                                                                                                                                                                                                                                                                                                                                                                                                                                                                                                                                                                                                                                                                                                                                                                                                                                                                                              |
|-------------------------------|--------------------------------------------------------------------------------------------------------------------------------------------------------------------------------------------------------------------------------------------------------------------------------------------------------------------------------------------------------------------------------------------------------------------------------------------------------------------------------------------------------------------------------------------------------------------------------------------------------------------------------------------------------------------------------------------------------------------------------------------------------------------------------------------------------------------------------------------------------------------------------------------------------------------------------------------------------------------------------------------------------------------------------------------------------------------------------------------------------------|
| Journal:                      | <i>BMJ Open</i>                                                                                                                                                                                                                                                                                                                                                                                                                                                                                                                                                                                                                                                                                                                                                                                                                                                                                                                                                                                                                                                                                              |
| Manuscript ID                 | bmjopen-2017-020347                                                                                                                                                                                                                                                                                                                                                                                                                                                                                                                                                                                                                                                                                                                                                                                                                                                                                                                                                                                                                                                                                          |
| Article Type:                 | Research                                                                                                                                                                                                                                                                                                                                                                                                                                                                                                                                                                                                                                                                                                                                                                                                                                                                                                                                                                                                                                                                                                     |
| Date Submitted by the Author: | 24-Jan-2018                                                                                                                                                                                                                                                                                                                                                                                                                                                                                                                                                                                                                                                                                                                                                                                                                                                                                                                                                                                                                                                                                                  |
| Complete List of Authors:     | Olza, Ibone; Universidad de Alcala de Henares Facultad de Medicina y Ciencias de la Salud, Medicina y Especialidades Médicas<br>Leahy-Warren, Patricia; Catherine McAuley School of Nursing and Midwifery, University College Cork, , Nursing and Midwifery<br>Benyamini, Yael; Tel Aviv University<br>Kazmierczak, Maria; Uniwersytet Gdanski, Institute of Psychology<br>Karlsdottir, Sigfridur Inga; University of Akureyri, Iceland, Health Sciences<br>Spyridou, Andria; Universitat Konstanz Fachbereich Psychologie<br>Crespo-Mirasol, Esther; University of Barcelona, Hospital Clinic<br>Takacs, Lea; Charles University, Department of Psychology<br>Hall, Priscilla J.; Emory University. Nell Hodgson Woodruff School of Nursing.<br>Murphy, Margaret; University College Cork National University of Ireland, Nursing and Midwifery<br>Jonsdottir, Sigridur Sia; Haskolinn a Akureyri, Health Sciences<br>Downe, Soo; University of Central Lancashire, research in childbirth and health<br>Nieuwenhuijze, Marianne; Zuyderland Medisch Centrum Heerlen, Research Centre for Midwifery Science |
| Keywords:                     | Childbirth, Physiological Childbirth, Lived experiences, Psychological, empowerment, OBSTETRICS                                                                                                                                                                                                                                                                                                                                                                                                                                                                                                                                                                                                                                                                                                                                                                                                                                                                                                                                                                                                              |
|                               |                                                                                                                                                                                                                                                                                                                                                                                                                                                                                                                                                                                                                                                                                                                                                                                                                                                                                                                                                                                                                                                                                                              |

SCHOLARONE™  
Manuscripts

1  
2  
3  
4 **WOMEN'S PSYCHOLOGICAL EXPERIENCES OF PHYSIOLOGICAL**  
5 **CHILDBIRTH: A META SYNTHESIS.**  
6

7 **AUTHORS:**  
8

9  
10 **Corresponding author: Olza, Ibone.** MD, Ph, D. Psychiatrist. Associate Professor at  
11 Universidad de Alcalá de Henares, Faculty of Medicine. Campus Universitario - C/ 19,  
12 Av. de Madrid, Km 33,600. Madrid, ES 28871.

13 ORCID #: [0000-0002-9614-9496](https://orcid.org/0000-0002-9614-9496) Email: [ibone.olza@uah.es](mailto:ibone.olza@uah.es)  
14  
15

16 2. **Leahy-Warren, Patricia.** Principal Investigator Nursing and Midwifery. Senior  
17 Lecturer. Nursing & Midwifery University College Cork, Ireland.

18 Researcher ID: D-5415-2014. Email: [Patricia.Leahy@ucc.ie](mailto:Patricia.Leahy@ucc.ie)  
19  
20

21 3. **Benyamini, Yael.** PhD. Professor. Bob Shapell School of Social Work. Tel Aviv  
22 University. Tel Aviv 69978 ISRAEL.

23 ORCID # 0000-0001-5110-8212 Email: [benyael@post.tau.ac.il](mailto:benyael@post.tau.ac.il)  
24  
25

26 4- **Kazmierczak, Maria.** Ph.D. Associate Professor in Psychology. Institute of  
27 Psychology. University of Gdansk Gdansk, Poland.

28 Email: [psymk@ug.edu.pl](mailto:psymk@ug.edu.pl)  
29  
30

31 5. **Karlsdottir, Sigfridur Inga.** Ph.D. Associate professor School of Health Sciences.  
32 University of Akureyri, Iceland

33 Email: [inga@unak.is](mailto:inga@unak.is)  
34  
35

36 6. **Spyridou, Andria.** Ph.D. University of Konstanz, Department of Psychology,  
37 Scientific Collaborator. Konstanz, Baden-Württemberg, DE

38 ORCID #: [orcid.org/0000-0002-2415-6240](https://orcid.org/0000-0002-2415-6240) Email: [andria.spyridou@uni-konstanz.de](mailto:andria.spyridou@uni-konstanz.de)  
39  
40

41 7. **Crespo-Mirasol, Esther.** Ph.D. Universitat Barcelona, Hospital Clinic, Midwifery,  
42 Barcelona, Catalunya, ES.

43 Email: [ecrespo@clinic.ub.es](mailto:ecrespo@clinic.ub.es)  
44  
45

46 8. **Takács, Lea.** M.A., Ph.D. Lecturer, Researcher Faculty of Arts, Charles University,  
47 Department of Psychology. Prague, Czech Republic.

48 Email: [lea.takacs@ff.cuni.cz](mailto:lea.takacs@ff.cuni.cz)  
49  
50

51 9. **Hall, Priscilla J.** PhD CNM RN. Emory University. Nell Hodgson Woodruff School  
52 of Nursing. USA.

53 Email: [pjhall@emory.edu](mailto:pjhall@emory.edu)  
54  
55  
56  
57  
58  
59  
60

1  
2  
3  
4 10. **Murphy, Margaret.** University College Cork National University of Ireland,  
5 Nursing and Midwifery Cork, IE

6 ORCID ID: [orcid.org/0000-0001-9979-9462](https://orcid.org/0000-0001-9979-9462) Email: [mgt.murphy@ucc.ie](mailto:mgt.murphy@ucc.ie)

7  
8 11. **Jonsdottir, Sigridur Sia.** Assistant professor. School of Health Science, University  
9 of Akureyri, Akureyri, Iceland

10 ORCID ID: 0000-0002-5152-3173 Email: [siaj@unak.is](mailto:siaj@unak.is)

11  
12 12. **Downe, Soo.** Ph.D. Professor of Midwifery Studies. University of Central  
13 Lancashire. UK.

14 ORCID ID: 0000-0003-2848-2550 Email: [sdowne@uclan.ac.uk](mailto:sdowne@uclan.ac.uk)

15  
16 13. **Nieuwenhuijze, Marianne J.** PhD. Professor of Midwifery. Research Centre for  
17 Midwifery Science Maastricht, Zuyd University, The Netherlands.

18 Email: [m.nieuwenhuijze@av-m.nl](mailto:m.nieuwenhuijze@av-m.nl)

19  
20  
21  
22 All authors conceived and designed the study. Marianne Nieuwenhuijze and Patricia  
23 Leahy Warren organised and conducted the search. All authors participated in the  
24 selection of the relevant articles. Ibone Olza and Esther Crespo Mirasol performed the  
25 quality assessment of the studies. Ibone Olza did the data extraction from the studies  
26 and drafted the manuscript. All authors interpreted the results, critically revised the  
27 manuscript for important intellectual content, and contributed to and approved the final  
28 version. Marianne Nieuwenhuijze, Soo Downe and Patricia Leahy Warren supervised  
29 the project.

30  
31  
32  
33 **SOURCE OF SUPPORT:** EU COST ACTION IS 1405 BIRTH: BUILDING  
34 INTRAPARTUM RESEARCH THROUGH HEALTH  
35 ([http://www.cost.eu/COST\\_Actions/isch/IS1405](http://www.cost.eu/COST_Actions/isch/IS1405))

36  
37  
38 **Word count:** 4.594 words

39  
40  
41 **Numbers of figures and tables:**

42 Figure 1. Flow chart

43  
44 Table 1: Characteristics of selected studies

45  
46  
47 Table 2: Themes, subthemes and studies contributing/thematic table and studies  
48 contributing to each finding.

49  
50  
51 Appendix 1: Search Terms

52  
53 **Conflict of interest disclosure: attached**

1  
2  
3  
4 **Additional unpublished data only available to authors.**  
5  
6  
7  
8  
9  
10  
11  
12  
13  
14

## 15 **ABSTRACT**

16 **Objective:** To synthesize qualitative studies on women's psychological experiences of  
17 physiological childbirth  
18

19 **Design:** Meta-synthesis  
20  
21

22 **Methods:** Studies exploring women's physiological experiences of birth using  
23 qualitative and mixed methods, which include a qualitative element, were eligible.  
24 MEDLINE, CINAHL, PsycINFO, PsycARTICLES, SocINDEX and Psychology and  
25 Behavioural Sciences Collection databases were searched as well as reference lists and  
26 contacting authors. Quality assessment was done independently using the Critical  
27 Appraisal Skills Programme (CASP) and CONSolidated criteria for REporting  
28 Qualitative studies (COREQ) checklists. Studies were synthesized using techniques of  
29 meta-ethnography.  
30  
31

32 **Results:** Eight studies involving 94 women were included. Three third order  
33 interpretations were identified: 'maintaining self confidence in early labour',  
34 'withdrawing within as labour intensifies' and 'the uniqueness of the birth experience'.  
35 Using the first, second and third order interpretations, a line of argument developed that  
36 demonstrated the empowering journey of giving birth encompassing the various  
37 emotions, thoughts and behaviours that women experience during birth.  
38  
39

40 **Conclusion:** Giving birth physiologically is a psychological experience that generates a  
41 sense of empowerment. The benefits of this process can be maximised through physical,  
42 emotional and social support for women, enhancing their belief in their ability to birth  
43 and not disturbing physiology unless it is necessary. Health care professionals need to  
44 take cognisance of the empowering effects of the psychological experience of  
45 physiological childbirth. Further research to validate the results from this study is  
46 necessary.  
47  
48

## 49 **STRENGTH AND LIMITATIONS**

- 50
- 51 • Meta ethnographic synthesis of women's lived experiences of physiological  
52 childbirth.
  - 53 • Research protocol was registered (PROSPERO Registration CRD42016037072)  
54 and published.  
55
- 56  
57  
58  
59  
60

- Limitations: all studies came from high income countries
- A relatively large number of women included in this study had a home birth

#### **WHAT IS KNOWN ON THIS TOPIC:**

- Women have vivid and lifelong memories of their childbirth.
- Women's experiences of childbirth are affected by the care received.
- Women describe their birth experiences in terms of feelings and emotions.
- Women feel disrespected when their emotions and needs are not considered during labour.

#### **WHAT THIS STUDY ADDS**

- Women having a physiological childbirth seem to go through a similar psychological process during labour and birth
- When labour intensifies, women withdraw-into an inner world.
- Feeling in control and having trust in the capacity to give birth are valued by women having a physiological childbirth
- Physiological childbirth contributes to a sense of empowerment in women

**KEYWORDS:** Physiological Childbirth, Psychology, Lived experience, Empowerment

## INTRODUCTION

Childbirth is a profound psychological experience that has a profound short-term and long-term impact on women which is physical, psychological, social and existential (1). It leaves lifelong vivid memories throughout their lives (2). The effects of a birth experience can be positive and empowering or negative and traumatizing (3-5). Women, regardless of their cultural background, need to share their birth stories to fully integrate an experience that is a hallmark of physical and emotional intensity (6).

Meeting the emotional and psychosocial needs of labouring women requires a deep understanding of the psychological aspects of childbirth by midwives and obstetricians. Factors that facilitate positive birth experience include having a sense of control during birth, opportunity for active involvement in care, support and response to labour pain (7-9). However, knowledge of how women lived through their experiences of childbirth remains limited. This lack of knowledge concerning the psychological dimension of childbirth, can lead to mismanagement of the birthing process. A birth experience can be traumatizing and devastating even when the immediate outcome is a physically healthy mother and newborn (10). Not taking labouring women's emotions and needs into account can be experienced by women as a lack of respect or even a form of abuse (11) or obstetric violence (12), which is a growing concern globally together with the medicalization of childbirth (13,14).

The medical model has traditionally described labour stages according to mechanical or physical cues such as dilation of the cervix and descent of the head as depicted on the traditional Friedman's curve or WHO partograph (15). However, it is questionable that women experience specific stages or phases as traditionally described by professionals (16). There have been attempts to describe the psychological process (17-19). Understanding the psychological experience in physiological childbirth can contribute to enhancing a salutogenic approach to health and promote healthy, happy families.

The aim of this systematic review is to combine qualitative evidence to describe the psychological process of women during physiological childbirth.

## METHODS

A meta-ethnographic synthesis approach was taken using the seven steps described by Noblit and Hare (20,21). This included reciprocal and refutational techniques as well as line of argument synthesis. This synthesis method has the potential to provide a higher level of analyses and generate new conceptual understandings (22). The method used was informed by Preferred Reporting Items for Systematic Reviews and Meta-Analyses (PRISMA) statements (23). The protocol was

1  
2  
3  
4 registered in the International Prospective Register of Systematic Reviews  
5 (PROSPERO) (Registration CRD42016037072) and published (24). Ethical approval  
6 was not required for this systematic review.  
7

8  
9 In March 2016 with an update in October 2017, a systematic search in  
10 EBSCOhost, including the database MEDLINE, CINAHL, PsycINFO,  
11 PsycARTICLES, SocINDEX and Psychology and Behavioural Sciences Collection was  
12 conducted (see appendix 1 for search terms). Groups of two authors independently read  
13 through the abstracts and selected articles; they discussed their differences until  
14 consensus was reached. If necessary, a third author made the final decision. Finally, we  
15 back-tracked references of the included articles and systematic reviews in search for  
16 articles that seemed relevant for the study question. We also considered suggestions  
17 from experts in this field and articles that came up from other sources.  
18  
19

20 The inclusion criteria were: (1) original research of (2) women who had  
21 physiological childbirth and (3) described their experiences and behaviours during (4)  
22 the whole process of childbirth. Studies were excluded, if the experience of childbirth  
23 was described by (1) any source other than the woman who experienced the birth (e.g.  
24 from health care professionals), (2) described a single stage in the birth process or (3)  
25 described births with major medical and surgical pain management or interventions, e.g.  
26 caesarean section. To ensure the quality of the findings in the study, all selected papers  
27 were first screened on the methodological quality using CASP (25). Subsequently, all  
28 the included papers were assessed using COREQ (26) to identify possible flaws in the  
29 studies.  
30  
31

32 Data analysis included a number of steps. First order interpretation involved  
33 reading and re-reading all studies to become familiar with their content, feeling and  
34 tone. The first author (IO) did line by line coding of the findings of all included studies.  
35 Quotes, interpretations and explanations in the original studies were treated as data. We  
36 coded sentences as F: Feelings, B: Behaviours (actions), S: Signs (e.g. pain,  
37 contractions), R: Relations (midwife, partner, baby, relatives), T: Time perception, C:  
38 Cognitions (thoughts and knowledge), L: Location (home, water, places, transferring)  
39 and then categorized these codes into (1) early labour, (2) intense labour, (3) pushing,  
40 (4) baby out (immediately), (5) placenta and (6) evaluation of the whole birth  
41 experience.  
42  
43  
44

45 Second and third order interpretation involved the collaborative authors'  
46 reflections on the first order interpretations to identify the themes and subthemes that  
47 describe the emerging constructs grounded in the primary studies. This was followed by  
48 a line of argument in which we created a model that best explains the psychological  
49 process of physiological childbirth.  
50  
51

### 52 *Reflexivity*

53 Given the subjective nature of qualitative research and to contribute to the  
54 methodological rigor of the study, the authors considered their views and opinions as  
55  
56  
57  
58  
59  
60



possible influences on the decisions taken throughout the research process. This paper is an output of EU funded COST Action 'BIRTH'. All the authors joined the Action because they believed in the importance of understanding physiological and psychological processes of childbirth, to enhance the capacity of women to labour and give birth normally where this was possible for them, and where it is their choice to do so. All the authors believed that birth is a profound physiological, psychological, and socio-cultural experience for most women and babies. The multidisciplinary backgrounds of the authors contributed to the analytical process, ensuring interpretation of findings were grounded in and emerged from the data. Use of refutational analyses as one of the steps of the meta-ethnographic process also minimized risk of overlooking information that did not fit with the authors pre-conceptions.

## RESULTS

### Included studies

The searches gave 1520 hits in EBSCOhost, resulting in 1.144 unique hits after removing 376 duplicates. Figure 1 demonstrates the selection process which resulted in 8 included studies. None of the selected studies were excluded based on the quality screening and assessment.

The 8 studies involved 94 women, 28 primiparous and 22 multiparous women. Four of the studies did not indicate the numbers for parity; of these, two had a mix of primiparous and multiparous women (17,27) and two did not indicate parity (28,29). Most of the interviews took place within a year after birth. Two studies included women up to 10 or 20 years after birth (17,27). One did not mention the time between the index birth and the interview (29). Thirty-nine of the women gave birth at home, four in a primary care unit and 51 in hospital. It seems that midwives were the primary carers of these women. Further characteristics of the studies can be found in Table 1.

TABLE 1. Characteristics of selected studies

| AUTHOR(S) / YEAR                         | TITLE                                                                                                 | COUNTRY     | METHODOLOGY                                                                                  | N PARITY               | TIME AFTER BIRTH    | BIRTH SETTING                                                             | OBJECTIVE                                                                     |
|------------------------------------------|-------------------------------------------------------------------------------------------------------|-------------|----------------------------------------------------------------------------------------------|------------------------|---------------------|---------------------------------------------------------------------------|-------------------------------------------------------------------------------|
| 1. Aune et al. 2015(3)                   | Promoting a normal birth and a positive birth experience – Norwegian women's perspectives             | Norway      | Qualitative, focused on salutogenic                                                          | 12 prim                | 5 -6 weeks          | Hospital birth unit.                                                      | Understand factors important for a normal birth and positive birth experience |
| 2. Dixon et al. 2014(19)                 | The emotional journey of labour-women's perspectives of the experience of labour moving towards birth | New Zealand | Critical feminist standpoint methodology                                                     | 6 prim<br>12 multi     | 6 months            | Midwifery continuity care: 7 homebirths, 4 primary care, 7 tertiary care. | To explore women's experiences of birth                                       |
| 3. Hall & Holloway 1998 (28)             | Staying in control: Women's experiences of labour in water                                            | UK          | Qualitative approach of grounded theory, which employs the constant comparative method'.     | 9<br>(no parity given) | 48 hours            | Hospital (water birth)                                                    | Examine women's attempt at control during labour in the water                 |
| 4. Halldorsdottir & Karlsdottir 1996(17) | Journeying through labour and delivery: Perceptions of women who have given birth                     | Iceland     | Phenomenological perspective of qualitative research theory                                  | 14<br>(mix of parity)  | 2 months to 20 yrs. | Hospital                                                                  | Explore experience of giving birth                                            |
| 5. Leap et al. 2010(30)                  | Journey to confidence: Women's experiences of pain in labour and relational continuity of care        | UK          | Qualitative, descriptive, thematic analysis                                                  | 5 prim<br>5 multi      | 4 weeks             | Albany midwifery practice, home and hospital                              | To explore women's view of continuity of care and pain in labour              |
| 6. Ng & Sinclair 2002(29)                | Women's experience of planned home birth: A phenomenological study                                    | UK          | Phenomenological research                                                                    | 9<br>(no parity given) | Not mentioned       | Homebirths                                                                | Explore women's lived experiences of planned homebirth                        |
| 7. Reed, Barnes & Rowe 2016(18)          | Women's experience of birth: Childbirth as a rite of passage                                          | Australia   | Narrative approach, rites of passage theory.                                                 | 5 prim<br>5 multi      | 6 months            | 6 hospital births, 4 homebirths                                           | Explore women's experiences of physiological childbirth                       |
| 8. Sjöblom et al. 2006(27)               | A qualitative study of women's experiences of home birth in Sweden                                    | Sweden      | Phenomenological-hermeneutic method. Qualitative approach based on open narrative interviews | 12<br>(mix of parity)  | Less than 10 years  | Homebirths                                                                | Illuminate the experience of giving birth at home                             |

## Meta-ethnographic analysis

Three main themes emerged: *maintaining self confidence in early labour*, *withdrawing within as labour intensifies* and *the uniqueness of the birth experience*. Several subthemes emerged within each of the three main themes (Table 2).

### I. Maintaining self-confidence in early labour

This theme presents women's experiences when they realised that they were in labour. The accounts indicated that women knew when they were in labour and most preferred to wait calmly for progress, maintaining confidence by keeping a familiar routine and environment.

#### *Experiencing the start of labour*

Women described their feelings when they realised that they were in early labour. Some felt excited and others described a lovely feeling comparing it to Christmas (19) (p372). A mixture of feelings emanated from the data at this time, including excitement, happiness, calm, sometimes mixed with apprehension and anxiety (3,17,30).

Women found it important to conserve their emotional strength and to maintain a positive attitude (3,17). Some described being happy with staying in their own home, and felt it was important to keep calm:

*"I felt confident by staying in my own living room"(3) (p724).*

They acknowledged the close and trustful relationships in their network at that time in their life (3,19,27).

*"Thought it was reassuring to be together with family in familiar surroundings"(3) (p724).*

#### *Sharing the beginning of labour*

When women recognised the beginning of labour, they shared it other women. Usually they called their mother or sister, before calling the midwife or the hospital (18,19). Few asked their midwife to be with them at this point.

*"At 10 o'clock in the morning I called the hospital. Of course, I had talked to my mom first"(3)(p274).*

They indicated that it was important for them to know their midwife because it gave them confidence and trust (3,18,19,29,30).

TABLE 2. Themes, subthemes and studies contributing/thematic table and studies contributing to each finding

| Main themes                                            | Sub themes                        | Studies                |
|--------------------------------------------------------|-----------------------------------|------------------------|
| <b>Maintaining self-confidence during early labour</b> |                                   | 3,17-19,27,29-30       |
|                                                        | Experiencing the start of labour  | 3,17-19,27, 29-30      |
|                                                        | Sharing the beginning of labour   | 3,17-19, 27, 29, 30    |
|                                                        | Keeping life normal               | 3,18, 19,27, 29,30     |
| <b>Withdrawing within as labour intensifies</b>        |                                   | 3, 17-19, 28-30        |
|                                                        | Accepting the intensity of labour | 3,17-19, 27-30         |
|                                                        | Going to an inner world           | 3,17-19,27,28          |
|                                                        | Coming back to push               | 3,19,17,30,29,18       |
| <b>Uniqueness of the birth experience</b>              |                                   | 3,17-19, 27-30         |
|                                                        | Reaching the glorious zenith      | 3,19,17,30, 29, 18, 27 |
|                                                        | Meeting the baby                  | 17-19, 27,29,30        |
|                                                        | Empowered self                    | 3,17-19, 27,29, 30     |
| <b>The empowering journey of giving birth</b>          |                                   | 3,17-19, 27,29, 30     |

### ***Keeping life normal***

The most common behaviour appeared to be continuing with the usual routine. There were many descriptions of wanting to remain at home, taking a shower, being aware of others' needs (like older children or even pets) and waiting happily. Their own home with their relatives and partners around them (3,17,30) was a tranquil place to be while their contractions were becoming more intense and the pain was increasing (3,17).

*"I was lying all night and with my labour pains and my dog came and lay by my feet...it was an incredible feeling, it was in September, all the apples in the trees...it was all so silent..."*(27)(p352).

## **II. Withdrawing within as labour intensifies**

As the labour intensifies, women withdrew into an inner world where time seemed to be suspended. Women described how this inner space allowed them to concentrate on, and therefore to manage the labouring process of childbirth. Notions of control in this phase were complex and nuanced – for some, the sense of being in control was achieved by feeling safe enough to hand over control (or guardianship) to the midwife, so that they could retreat into their inner world of labouring.

### ***Accepting the intensity of labour***

When contractions became stronger and pain intensified, women felt the need to be fully focussed on the physical task (19). At this point women really needed to be with safe companions in a safe place. This was a moment to contact the midwife and /or move to the hospital.

*"I've got to be somewhere where I can actually allow myself to feel what I am going through"*(19)(p373).

Accepting pain as a natural part of childbirth was important for women (3,29). Trust in their body to respond to the pain emotionally and work with it was key (3,17). Some women were active, needing to move around (29) or submerge in water (28).

*"I don't think it is explained very well what the pain is for. People just get frightened of the pain. If they could see it as something useful...the pain is there so as you can help them out, it's not frightening at all"*(29)(p58).

Women described their desire to be in control which could be different for each of them. For some, control meant staying on top of things and deciding what they needed, whereas for others, it was the control of being able to hand over control to the midwives (28).

*"Not having any experience of labour, I needed the midwife to tell me what to do. Because she was in control I felt I was too"*(28)(p33).

Women expressed their need for a caring approach (3,17,19,28). The support from midwives helped women to face the vulnerability they experienced during labour.

1  
2  
3  
4 *"I felt in such a great need for caring at this time, because naturally it is difficult*  
5 *and you need someone to take part in this with you, and someone who agrees that it*  
6 *hurts. I don't think people should try to minimise your perception that it hurts. They*  
7 *should not maximise it either"*(17)(p53).

8  
9 *"You are so incredibly vulnerable and I feel that you have such a need that*  
10 *someone is kind to you and shows you some interest. All your energy goes into giving*  
11 *birth to this child and you simply don't have energy left to argue with someone or*  
12 *make a fuss about something. You almost have to take whatever your surroundings*  
13 *offer you"*(17)(p52).

14  
15 They also described how important their partner was.

16 *"I felt he was my lifeline, he had the best analgesic effect on me and he did not*  
17 *leave me once"*(27)(p352).

18  
19 Sometimes they needed to be alone with their partners but to have the  
20 opportunity to reach their midwife whenever they needed (28,30).

21 *"I felt like we were doing it ourselves which was nice. We didn't feel we needed*  
22 *the midwife all the time but she was there if we did"*(28)(p34).

### 23 24 25 **Going to an inner world**

26 Women described how they withdrew within themselves to an inner world and the  
27 importance of living in the moment. Words used included "narrowed", "zone",  
28 "faraway place", "another planet" and "private"(17-19,27).

29 *"Nothing else matters and the universe kind of shrinks to this particular, you*  
30 *know this particular job that you have to do which is you know about birthing your*  
31 *baby"*(19)(p373).

32  
33 *"Like with both my labours, I took myself away, I need not to have people looking*  
34 *at me"*(18)(p49).

35  
36 Women described time as being altered and in some cases suspended.

37 *"My sense of time was completely lost, as if I had forgotten it in a drawer at*  
38 *home. It was a very strange feeling. There are a lot of people around you and yet you*  
39 *are in your own world. Even if we were in the same room we were not in the same*  
40 *world..."*(17)(p52).

41  
42 Over time as the intensity of the contractions and the pain increased, women  
43 described feelings of fear and desperation (19). Some felt exhausted and deprived of  
44 energy (17,29). The thought that they could not continue any more, expressing fears of  
45 death (17).

46  
47 *"I was so optimistic in the beginning of the latter birth...I had given birth before*  
48 *and I survived...so that you believe you will survive. However, in both births I had*  
49 *this feeling for some time that I would never survive this"*(17)(p56).

50  
51 *"I was requesting for a caesarean, I was requesting for everything! Because I just*  
52 *wanted to get over with it. I just said I was going to die. At one point I felt like I was*  
53 *going to faint and stuff like that. I said: 'Please Sandra, I want pain relief.' I was*  
54  
55  
56  
57  
58  
59

1  
2  
3  
4 *actually begging her, 'Please, please, please.' I said, 'I'm going to die! I won't be*  
5 *able to do this!'" (30)(p239).*  
6

### 7 **Coming back to push**

8  
9 When starting to push, time was no longer suspended and women became more  
10 active (17,19).

11 *"When I started to push, it was as if a curtain was drawn. A totally different*  
12 *perception, suddenly I was awake, alert and quite aware of timing"(17)(p55).*

13 *"... I was at the top of the mountain when I started to push. And then I had to get*  
14 *down again. And that was it !"(3)(p725).*  
15  
16

### 17 **III. Uniqueness of the birth experience**

18 With the birth of their baby women described relief, joy at meeting their baby, and  
19 sense of transformation.  
20  
21

#### 22 **Reaching the glorious zenith**

23 Directly after birth, women described feelings of pride and joy in achieving and  
24 experiencing natural childbirth (17,19,29,30).

25 *"So I was brave, I was strong!... So I was like, 'Yes, I have done it! Yes, I can do*  
26 *it!' I was so happy. I honestly never had this kind of joy since I was born. I don't*  
27 *know where this joy came from. I don't know how to describe the endless joy that*  
28 *came in me"(30) (p239).*  
29  
30

31 *"What is most prominent in the birth experience as a whole is the sense of victory,*  
32 *the feeling of ecstasy when the baby is born. That feeling is unique, and in the last*  
33 *birth I was without all medication and therefore I could enjoy this feeling much*  
34 *better, well I enjoyed it completely"(17)(p57).*  
35

36 Women described the intensity of their feelings of childbirth as being their  
37 greatest achievement which is unparalleled.  
38

39 *"It is an intense experience, a powerful life experience. It is naturally magnificent*  
40 *that you, just to find that you are capable of giving birth, to a child, that you can do*  
41 *it. To be such a perfect being that you can do it...the feeling you get when you get*  
42 *your new born child into your arms naturally is indescribable. It is a feeling you*  
43 *cannot compare with anything else. It is awe inspiring"(17)(p56).*  
44

45 Women also expressed feelings of spiritual closeness and gratitude.

46 *"I had this holiness, being close to the universe. I feel such gratitude for the*  
47 *possibility to give birth at home"(27)(p350).*  
48

49 Some women were also surprised and satisfied how effectively their body had  
50 taken them through the labour (19) and they were proud of how they managed their pain  
51 which positively influenced their confidence in becoming a mother (30).

52 *"I can't really explain. I'm very pleased, very pleased, that I did it naturally. I*  
53 *feel so proud, full of myself, I am very proud to have him naturally. I am very proud*  
54 *even now."(30)(p239).*  
55  
56  
57  
58  
59  
60

1  
2  
3  
4 However, as well as being a unique and powerful experience, some women also  
5 expressed a need for a sense of peace, and of routine to ground themselves in the new  
6 reality of motherhood (29).  
7

### 8 ***Meeting the baby***

9  
10 Women described the speed with which they assured themselves that their baby  
11 looked normal.

12 *“I remember particularly that as soon as the baby is born you think incredibly fast*  
13 *and you look incredibly fast whether there are, without all doubts, ten toes and ten*  
14 *finger and everything that is supposed to be in place is there and many other*  
15 *things.”(17)(p56).*  
16  
17

18  
19 Women with other children were impatient for them to meet their new sibling as it  
20 was important for them to involve other family members soon after birth to share this  
21 important moment with them (29).

22 *“As soon as I had the baby I’d had my bath and everything and my mum and*  
23 *everybody arrived...we were all in the garden with the baby”(29)(p58).*  
24

25 Women described a sense of being ‘cocooned’ within the family soon after the  
26 baby was born (30) and this was expressed in the manner in which the new baby was  
27 welcomed by hugs, kisses and expressions of love (27).

28 *“By three o’clock everybody had left except for just ourselves, the four of us, the*  
29 *whole family, we were just tucked up across my bed and I think in some ways that*  
30 *was the moment that felt that this is absolutely right, there’s nothing more right in*  
31 *the world. I was just all so peaceful, so ---why would do anything differently kind of*  
32 *feeling to it”(29)(p58).*  
33  
34

35 Only in one study there was a mention of placenta by the researchers who  
36 indicated that some women considered it as an anti-climax and others part of the  
37 recovery process (19).  
38  
39

### 40 ***Empowered-self***

41 After processing their emotions, women described feeling different. They  
42 absorbed new knowledge and understanding about themselves and incorporated this  
43 into their sense of self. They talked about their birth as an empowering experience (18).

44 *“...I felt I could sense right then, when minutes passed by, I felt that I (tearful)*  
45 *was a little bit different”(17)(p56).*  
46

47 Women linked their pride about coping with pain to feeling strong and confident  
48 and to a positive start to new motherhood (30).  
49

50 *“When you do that as a woman, you know you can do anything ... I realized how*  
51 *everything else in life is easy, if you can do that (enduring 70 hours of no sleep, wild*  
52 *contractions, etc.) you can do anything. I am sad that so many women don’t get to*  
53 *understand this”(18)(p52).*  
54  
55  
56  
57  
58  
59



## The empowering journey of giving birth

Following the meta-ethnographic approach, a line of argument was constructed based on the first, second and third order interpretations. This line of argument demonstrated ‘the empowering journey of giving birth’ encompassing the various emotions, thoughts and behaviours that women experience during birth.

Women’s psychological journey commenced with telling other women from their social network that labour had started, while they remained cocooned in a familiar environment. Most women focused on maintaining self-confidence at the start of labour, and tended to withdraw into an inner world when labour became more intense. As birth progressed women experienced an altered state of consciousness including a change in time perception and intense feelings such as fear of dying. Women described various ways of coping with the pain and keeping control, including releasing control to the midwife where appropriate. With the urge to push, women felt that once again they became alert and more active. Immediately after the baby was born, feelings of joy and pride were predominant. The journey through childbirth meant a growth in personal strength. Some women described themselves as a changed person in the sense that they felt stronger, empowered, and ready to meet the demands of the newborn.

## DISCUSSION

Our study offers new insights into women’s psychological experience of physiologic childbirth as a systematic synthesis on this topic has not been previously reported. We created a model of the emerging psychological pattern of this journey that is designated in terms of emotions and behaviours. Women described birth as a challenge, but predominantly a positive experience which they were able to overcome with their own coping resources and the help of others. For them, this resulted in feelings of strength to face a new episode in their life with their family.

Elements of this pattern are coherent with findings from other studies that have previously described the preference for familiarity of environment and people at the start of birth (31), the altered state of consciousness (32-34), the different time perception (35-39), the empowerment (6,40-42) and change (34,43) that come with childbirth.

In our meta-synthesis, women expressed confidence in their capacity to give birth and trust in themselves and in the process. Positive perceptions of their own coping strategies and confidence in their ability to go through birth is linked to women’s positive experience of birth (44).

Women’s psychological experience of physiological childbirth is strongly influenced by the people present at their birth. Women indicated that close relatives, mostly their partner and mother, as well as care providers were highly relevant for the way women experienced their birthing process. Women described the presence of their partner as the person with whom they most closely shared their experience and relied on

1  
2  
3  
4 for support, confirming that human birth is a social event (45,46). This is in line with  
5 other studies that emphasized the decisive contribution partners can make to feelings of  
6 trust (47,48) and the woman's wish for a physiological birth (49).  
7

8 With regard to the midwife, women indicated their presence as being important  
9 for them. Depending on which point of the process, women tended to want to be alone  
10 at a distance from the midwife but as labour intensifies, it seems that they need to be  
11 more visible and present for the woman, either to support her control or take control if  
12 offered by the woman. Control was a key feature in our study. Over the years various  
13 researchers identified different internal and external dimensions of control (50,51).  
14 Women's internal control includes a sense of self-control, such as thoughts, emotions,  
15 behaviours and coping with labour pain. External control is described as the woman's  
16 involvement in what is happening during birth, understanding what care providers are  
17 doing, and influence on decisions. What seems important to women is not so much  
18 'having control', but the affective component, which is the 'feeling' of having  
19 influence(52). Women's external control also seemed to arise from feeling that they  
20 were informed and could challenge decisions if the need arose (50).  
21  
22  
23

24 Mixed feelings, both positive and negative were expressed regarding pain  
25 similar to several studies (53-55). Women experienced pain as meaningful in relation to  
26 their baby and a contribution to gaining strength to cope with the demands of  
27 parenthood. Berentson-Shaw et al. (2009) indicated that stronger self-efficacy during  
28 birth explains a lower level of pain (44). Rijnders et al. (2008) showed that women who  
29 felt unsatisfied about their coping with pain had more negative emotions about their  
30 birth (56).  
31

32 What this meta-synthesis demonstrates is the enormous importance of having  
33 maternity care providers, including midwives, at the birth that are compassionate and  
34 support women to keep a sense of control that is adjusted to their personal needs and  
35 wishes. Care providers can strengthen women's sense of coherence in offering them  
36 emotional support, stimulating trust and confidence, and allowing meaningful others to  
37 be there during the birthing process. Labouring women need to be able to create a  
38 trustful bond with midwives and obstetricians attending them that enable them to feel in  
39 control and reassured. Midwives can facilitate this process by demonstrating empathy,  
40 compassion and reassuring women in their belief in their ability to birth. These are key  
41 skills and competencies identified in midwifery-led care, recommended to be  
42 implemented worldwide (57).  
43  
44  
45

46 This study offers an insight into women's psychological experience of  
47 physiological childbirth that can be compared with the experience of women whose  
48 birth evolves differently, or when women's experiences are significantly negative with  
49 emotional or mental health issues such as postpartum depression or post traumatic stress  
50 disorder. Most women in this synthesis indicated that for them birth was an enriching  
51 experience. After birth, they expressed confidence in their own strength to face the  
52 challenges of motherhood. These emotions may be quite different when women are  
53 confronted with unexpected complications during childbirth, such as a referral to  
54  
55  
56  
57  
58  
59  
60

1  
2  
3  
4  
5  
6  
7  
8  
9  
10  
11  
12  
13  
14  
15  
16  
17  
18  
19  
20  
21  
22  
23  
24  
25  
26  
27  
28  
29  
30  
31  
32  
33  
34  
35  
36  
37  
38  
39  
40  
41  
42  
43  
44  
45  
46  
47  
48  
49  
50  
51  
52  
53  
54  
55  
56  
57  
58  
59  
60

obstetric care, an assisted vaginal birth or unplanned caesarian section, which are associated with more negative emotions (58,59). Some women experience grief following a traumatic birth, this grieving may well be the mourning over the loss of the experience which contributes to feelings of empowerment (60).

This study has several limitations. A relatively large number of women included in this study had a home birth (39 of the 94 women). Women wishing a home birth seem to have less worries about health issues or fear of childbirth, and a greater desire for personal autonomy (61,62). Women planning a midwife-led birth also have lower rates of interventions which is also linked to positive experiences in birth(63).

This meta-synthesis was a retrospective study among women in high income countries, our sample was small and we lacked information on women's parity, preparation for birth and specific details of supporting professionals, partners and significant others which can be of major influence on women's experience of childbirth.

Further research is needed, women's psychological experience of physiological childbirth needs to be studied in women from other backgrounds and other cultural systems. Additionally, it is of great importance to gain insight into the psychological experience of birth in women with complications during pregnancy or childbirth. As childbirth is a neurobiological event directed by neurohormones produced both by the maternal and fetal brain (64), further research needs to address the interrelationship neurohormones, psychological experience and physiological labour and birth (65).

Positive, physiological labour and birth can therefore be a salutogenic event, from a mental health perspective, as well as in terms of physical wellbeing. The benefits of this process can be maximised through physical, emotional and social support for women, enhancing their belief in their ability to birth and not disturbing physiology unless it is necessary.

## CONCLUSIONS

Giving birth physiologically is a psychological journey that seems to generate a sense of empowerment in the transition to motherhood. The benefits of this process can be maximised through physical, emotional and social support for women, enhancing their belief in their ability to birth and not disturbing physiology unless it is necessary. Health care professionals need to take cognisance of the empowering effects of the psychological experience of physiological childbirth. Further research to validate the results from this study is necessary.

## REFERENCES

(1) Held V. Birth and death. *Ethics* 1989;99(2 (Jan)):362-388.

- 1  
2  
3  
4 (2) Simkin P. Just another day in a woman's life? Nature and consistency of women's  
5 long-term memories of their first birth experiences... part 2. *Birth* 1992;19(2):81-18p.  
6
- 7 (3) Aune I, Marit Torvik H, Selboe ST, Skogas AK, Persen J, Dahlberg U. Promoting a  
8 normal birth and a positive birth experience - Norwegian women's perspectives.  
9 *Midwifery* 2015 Jul;31(7):721-727.  
10
- 11 (4) Elmir R, Schmied V, Wilkes L, Jackson D. Women's perceptions and experiences of  
12 a traumatic birth: a meta-ethnography. *J Adv Nurs* 2010 Oct;66(10):2142-2153.  
13
- 14 (5) Ayers S, Pickering AD. Do women get posttraumatic stress disorder as a result of  
15 childbirth? A prospective study of incidence. *Birth* 2001 Jun;28(2):111-118.  
16
- 17 (6) Callister LC. Making meaning: women's birth narratives. *J Obstet Gynecol Neonatal*  
18 *Nurs* 2004;33(4):508-518.  
19
- 20 (7) Karlsdottir SI, Sveinsdottir H, Kristjansdottir H, Aspelund T, Olafsdottir OA.  
21 Predictors of women's positive childbirth pain experience: Findings from an Icelandic  
22 national study. *Women Birth* 2017 September 21.  
23
- 24 (8) Nieuwenhuijze M, Low LK. Facilitating women's choice in maternity care. *J Clin*  
25 *Ethics* 2013;24(3):276-282.  
26
- 27 (9) Meyer S. Control in childbirth: a concept analysis and synthesis. *J Adv Nurs* 2013  
28 *Jan*;69(1):218-228.  
29
- 30 (10) Beck CT. Birth trauma: in the eye of the beholder. *Nurs Res* 2004;53(1):28-35.  
31
- 32 (11) Thomson G, Downe S. Widening the trauma discourse: the link between childbirth  
33 and experiences of abuse. *J Psychosom Obstet Gynaecol* 2008 Dec;29(4):268-273.  
34
- 35 (12) Sadler M, Santos MJ, Ruiz-Berdun D, Rojas GL, Skoko E, Gillen P, et al. Moving  
36 beyond disrespect and abuse: addressing the structural dimensions of obstetric violence.  
37 *Reprod Health Matters* 2016 May;24(47):47-55.  
38
- 39 (13) Lukasse M, Schroll AM, Karro H, Schei B, Steingrimsdottir T, Van Parys AS, et  
40 al. Prevalence of experienced abuse in healthcare and associated obstetric characteristics  
41 in six European countries. *Acta Obstet Gynecol Scand* 2015 Jan 28.  
42
- 43 (14) Johanson R, Newburn M, Macfarlane A. Has the medicalisation of childbirth gone  
44 too far? *BMJ* 2002 Apr 13;324(7342):892-895.  
45
- 46 (15) Friedman E. The graphic analysis of labor. *Am J Obstet Gynecol* 1954  
47 *Dec*;68(6):1568-1575.  
48
- 49 (16) Dixon L, Skinner J, Foureur M. Women's perspectives of the stages and phases of  
50 labour. *Midwifery* 2013 Jan;29(1):10-17.  
51  
52  
53  
54  
55  
56  
57  
58  
59  
60

- 1  
2  
3  
4 (17) Halldorsdottir S, Karlsdottir SI. Journeying through labour and delivery:  
5 perceptions of women who have given birth. *Midwifery* 1996 Jun;12(2):48-61.  
6  
7 (18) Reed R, Barnes M, Rowe J. Women's Experience of Birth: Childbirth as a Rite of  
8 Passage. *International Journal of Childbirth* 2016;6(1):46-56.  
9  
10 (19) Dixon L, Skinner J, Foureur M. The emotional journey of labour-women's  
11 perspectives of the experience of labour moving towards birth. *Midwifery* 2014  
12 Mar;30(3):371-377.  
13  
14 (20) Carroll C. Qualitative evidence synthesis to improve implementation of clinical  
15 guidelines. *BMJ* 2017;356.  
16  
17 (21) Noblit G, Hare R. *Meta-ethnography: synthesizing qualitative studies*. Newbury  
18 Park: SAGE; 1998.  
19  
20 (22) Barnett-Page E, Thomas J. Methods for the synthesis of qualitative research: a  
21 critical review. *BMC Med Res Methodol* 2009 Aug 11;9:59.  
22  
23 (23) Moher D, Liberati A, Tetzlaff J, Altman DG, PRISMA Group. Preferred reporting  
24 items for systematic reviews and meta-analyses: the PRISMA statement. *Int J Surg*  
25 2010;8(5):336-341.  
26  
27 (24) Leahy-Warren P, Nieuwenhuijze M, Kazmierczak M, Benyamini Y, Murphy M,  
28 Crespo-Mirasol E, et al. The Psychological Experience of Physiological Childbirth: a  
29 Protocol for a Systematic Review of Qualitative Studies. *International Journal of*  
30 *Childbirth* 2017;7(2):101-109.  
31  
32 (25) CASP. Critical Appraisal Skills Programme (CASP). (Qualitative checklist).  
33 Available at: <http://www.casp-uk.net/casp-tools-checklists>. Accessed OCTOBER, 2017.  
34  
35 (26) Tong A, Sainsbury P, Craig J. Consolidated criteria for reporting qualitative  
36 research (COREQ): a 32-item checklist for interviews and focus groups. *Int J Qual*  
37 *Health Care* 2007 Dec;19(6):349-357.  
38  
39 (27) Sjoblom I, Nordstrom B, Edberg AK. A qualitative study of women's experiences  
40 of home birth in Sweden. *Midwifery* 2006 Dec;22(4):348-355.  
41  
42 (28) Hall SM, Holloway IM. Staying in control: women's experiences of labour in  
43 water. *Midwifery* 1998 Mar;14(1):30-36.  
44  
45 (29) Ng M, Sinclair M. Women's experience of planned home birth: a  
46 phenomenological study. *RCM Midwives* 2002;5(2):56-59.  
47  
48 (30) Leap N, Sandall J, Buckland S, Huber U. Journey to confidence: women's  
49 experiences of pain in labour and relational continuity of care. *J Midwifery Womens*  
50 *Health* 2010;55(3):234-242.  
51  
52  
53  
54  
55  
56  
57  
58  
59  
60

- 1  
2  
3  
4 (31) Carlsson I. Being in a safe and thus secure place, the core of early labour: A  
5 secondary analysis in a Swedish context. *International journal of qualitative studies on*  
6 *health and well-being* 2016;11(1):30230-8.  
7
- 8 (32) Machin D, Scamell M. The experience of labour: using ethnography to explore the  
9 irresistible nature of the bio-medical metaphor during labour. *Midwifery* 1997  
10 Jun;13(2):78-84.  
11
- 12 (33) Burvill S. Midwifery diagnosis of labour onset. *BR J MIDWIFERY*  
13 2002;10(10):605 6p.  
14
- 15 (34) Parratt J. The impact of childbirth experiences on women's sense of self: a review  
16 of the literature. *Aust J Midwifery* 2002;15(4):10-16.  
17
- 18 (35) Rich OJ. Temporal and spatial experience as reflected in the verbalizations of  
19 multiparous women during labor. *Matern Child Nurs J* 1973 January 01;2(4):239-325.  
20
- 21 (36) Beck CT. Women's temporal experiences during the delivery process: a  
22 phenomenological study. *Int J Nurs Stud* 1994 Jun;31(3):245-252.  
23
- 24 (37) Simonds W. Watching the clock: keeping time during pregnancy, birth, and  
25 postpartum experiences. *Soc Sci Med* 2002 Aug;55(4):559-570.  
26
- 27 (38) Parratt J, Fahy K. Creating a 'safe' place for birth: an empirically grounded theory.  
28 *NZ COLL MIDWIVES J* 2004;30:14 4p.  
29
- 30 (39) Maher JM. Progressing through labour and delivery: Birth time and women's  
31 experiences. *Women's Studies International Forum* 2008;31(2):192-137.  
32
- 33 (40) Anjani A. Soparkar. The telling of childbirth stories. US: ProQuest Information &  
34 Learning; 1998.  
35
- 36 (41) Johnson TR, Callister LC, Freeborn DS, Beckstrand RL, Huender K. Dutch  
37 women's perceptions of childbirth in the Netherlands. *MCN Am J Matern Child Nurs*  
38 2007;32(3):170-177.  
39
- 40 (42) Lindgren H, Erlandsson K. Women's experiences of empowerment in a planned  
41 home birth: a Swedish population-based study. *Birth* 2010 Dec;37(4):309-317.  
42
- 43 (43) Lundgren I. Swedish women's experience of childbirth 2 years after birth.  
44 *Midwifery* 2005 Dec;21(4):346-354.  
45
- 46 (44) Berentson-Shaw J, Scott KM, Jose PE. Do self- efficacy beliefs predict the  
47 primiparous labour and birth experience? A longitudinal study. *Journal of Reproductive*  
48 *and Infant Psychology* 2009;27(4):357-373.  
49
- 50  
51  
52  
53  
54  
55  
56  
57  
58  
59  
60

- 1  
2  
3  
4 (45) Rosenberg K, Trevathan W. Birth, obstetrics and human evolution. *BJOG* 2002  
5 Nov;109(11):1199-1206.  
6  
7 (46) Rosenberg KR, Trevathan WR. The evolution of human birth. *Sci Am* 2001  
8 Nov;285(5):72-77.  
9  
10 (47) Lundgren I, Karlsdottir SI, Bondas T. Long-term memories and experiences of  
11 childbirth in a Nordic context—a secondary analysis. *International Journal of*  
12 *Qualitative Studies on Health and Well-being* 2009;4(2):115-128.  
13  
14 (48) Howarth AM, Swain N, Treharne GJ. Taking personal responsibility for well-being  
15 increases birth satisfaction of first time mothers. *J Health Psychol* 2011;16(8):1221-  
16 1230.  
17  
18 (49) Kringeland T, Daltveit AK, Møller A. How Does Preference for Natural Childbirth  
19 Relate to the Actual Mode of Delivery? A Population-based Cohort Study from  
20 Norway. *Birth* 2010;37(1):21-27.  
21  
22 (50) Green JM, Baston HA. Feeling in control during labor: concepts, correlates, and  
23 consequences. *Birth* 2003 Dec;30(4):235-247.  
24  
25 (51) Ford E, Ayers S. Stressful events and support during birth: the effect on anxiety,  
26 mood and perceived control. *J Anxiety Disord* 2009 Mar;23(2):260-268.  
27  
28 (52) Green JM. Commentary: what is this thing called "control"? *Birth* 1999 March  
29 01;26(1):51-52.  
30  
31 (53) Waldenstrom U, Bergman V, Vasell G. The complexity of labor pain: experiences  
32 of 278 women. *J Psychosom Obstet Gynaecol* 1996 Dec;17(4):215-228.  
33  
34 (54) Lundgren I, Dahlberg K. Women's experience of pain during childbirth. *Midwifery*  
35 1998 Jun;14(2):105-110.  
36  
37 (55) Whitburn LY, Jones LE, Davey MA, Small R. Women's experiences of labour pain  
38 and the role of the mind: an exploratory study. *Midwifery* 2014 Sep;30(9):1029-1035.  
39  
40 (56) Rijnders M, Baston H, Schonbeck Y, van der Pal K, Prins M, Green J, et al.  
41 Perinatal factors related to negative or positive recall of birth experience in women 3  
42 years postpartum in the Netherlands. *Birth* 2008 Jun;35(2):107-116.  
43  
44 (57) Sandall J, Soltani H, Gates S, Shennan A, Devane D. Midwife-led continuity  
45 models versus other models of care for childbearing women. *Cochrane Database Syst*  
46 *Rev* 2016 Apr 28;4:CD004667.  
47  
48 (58) Handelzalts JE, Waldman Peyser A, Krissi H, Levy S, Wiznitzer A, Peled Y.  
49 Indications for Emergency Intervention, Mode of Delivery, and the Childbirth  
50 Experience. *PLoS One* 2017 Jan 3;12(1):e0169132.  
51  
52  
53  
54  
55  
56  
57  
58  
59  
60

1  
2  
3  
4 (59) Henriksen L, Grimsrud E, Schei B, Lukasse M, Bidens Study Group. Factors  
5 related to a negative birth experience - A mixed methods study. *Midwifery* 2017  
6 Aug;51:33-39.  
7

8 (60) Bell AF, Andersson E. The birth experience and women's postnatal depression: A  
9 systematic review. *Midwifery* 2016 August 01;39:112-123.  
10

11 (61) Neuhaus W, Piroth C, Kiencke P, Gohring UJ, Mallman P. A psychosocial analysis  
12 of women planning birth outside hospital. *J Obstet Gynaecol* 2002 Mar;22(2):143-149.  
13

14 (62) van Haaren-Ten Haken T, Hendrix M, Nieuwenhuijze M, Bude L, de Vries R,  
15 Nijhuis J. Preferred place of birth: characteristics and motives of low-risk nulliparous  
16 women in the Netherlands. *Midwifery* 2012 Oct;28(5):609-618.  
17  
18

19 (63) Maassen MS, Hendrix MJ, Van Vugt HC, Veersema S, Smits F, Nijhuis JG.  
20 Operative deliveries in low-risk pregnancies in The Netherlands: primary versus  
21 secondary care. *Birth* 2008 December 01;35(4):277-282.  
22  
23

24 (64) Buckley SJ. Executive Summary of Hormonal Physiology of Childbearing:  
25 Evidence and Implications for Women, Babies, and Maternity Care. *J Perinat Educ*  
26 2015;24(3):145-153.  
27

28 (65) Dixon L, Skinner J, Foureur M. The emotional and hormonal pathways of labour  
29 and birth: integrating mind, body and behaviour. *New Zealand College of Midwives*  
30 *Journal* 2013;48(1):15-23.  
31  
32

### 33 34 35 **FIGURE LEGENDS:**

36  
37 FIGURE 1. Flow chart

38  
39 Table 1. Characteristics of selected studies

40  
41 Table 2. Themes, subthemes and studies contributing/thematic table and studies contributing to  
42 each finding

43  
44 Appendix 1. Search Terms  
45  
46  
47  
48  
49  
50  
51  
52  
53  
54  
55  
56  
57  
58  
59  
60



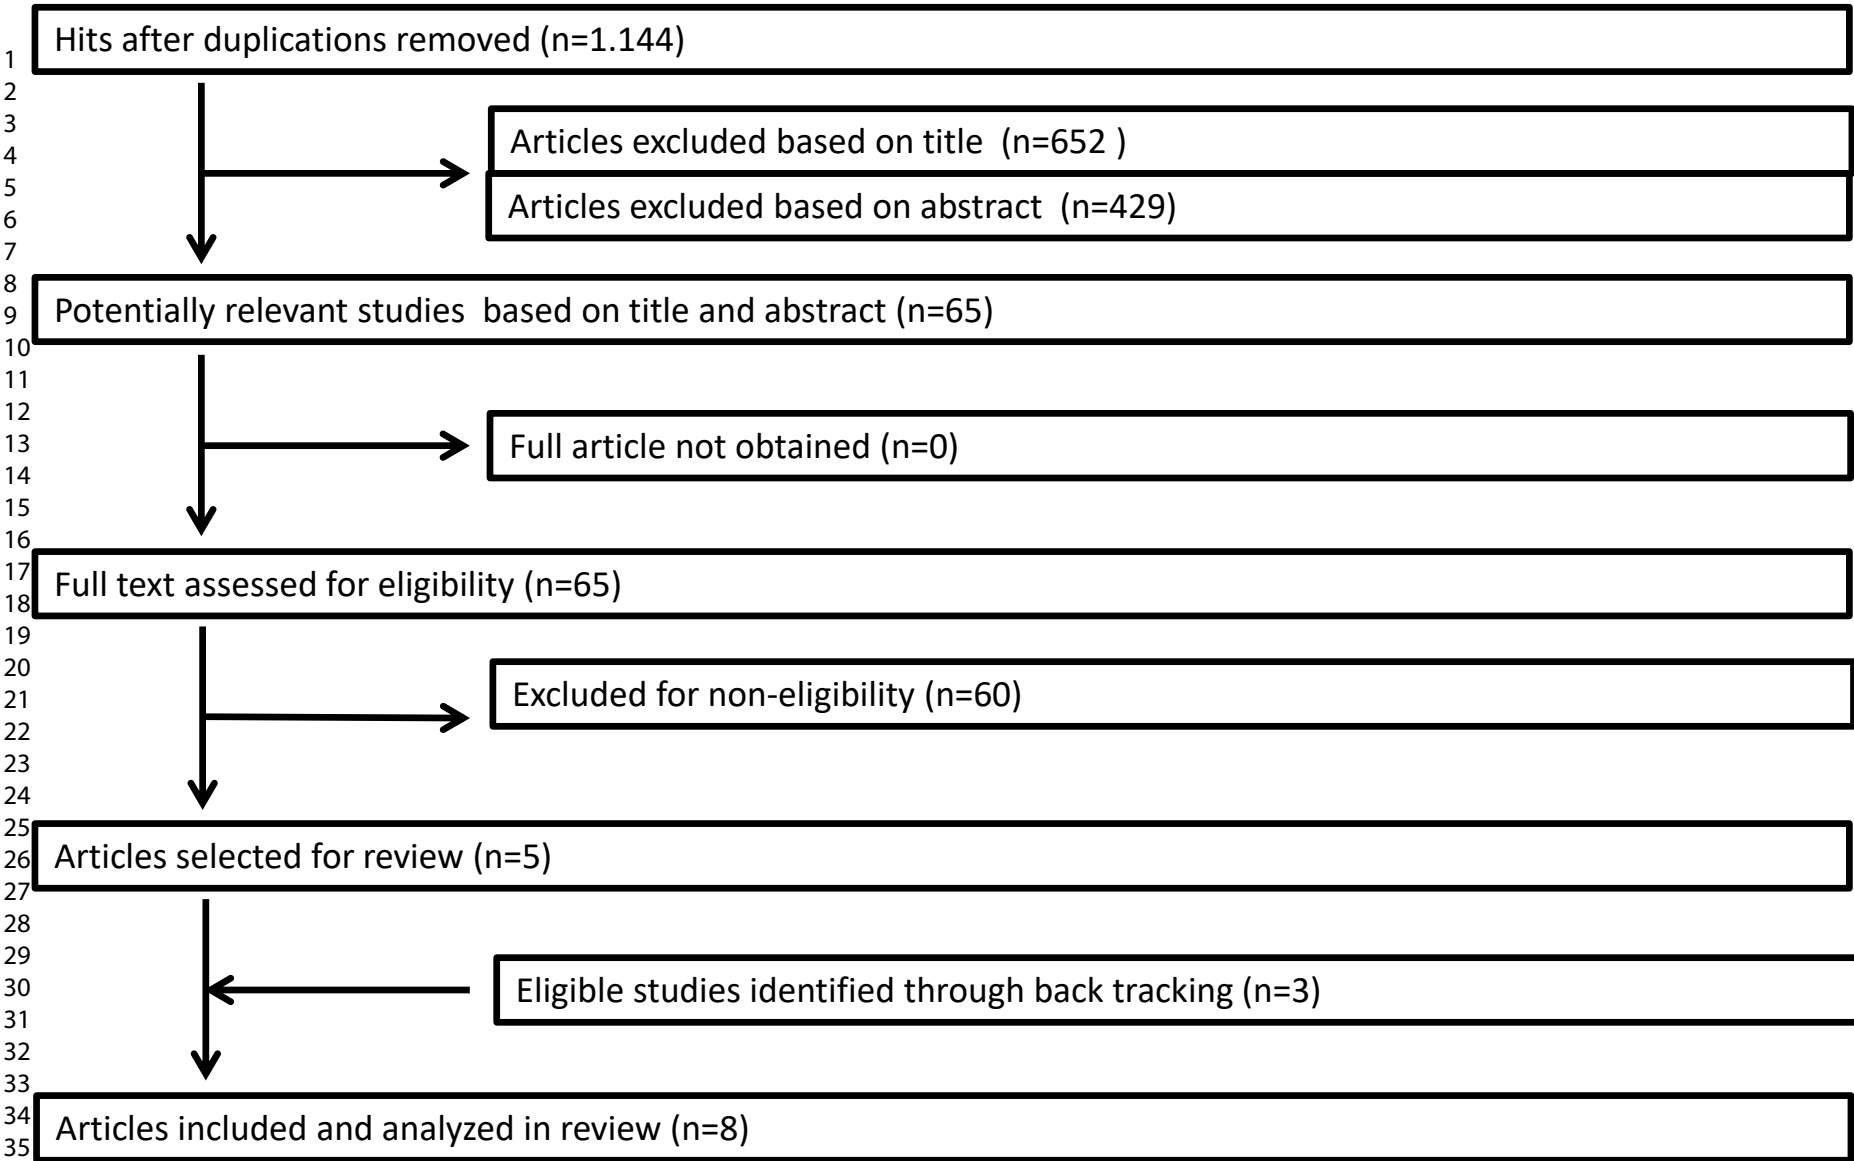

|                                                                                                                                                                                       | AND |                                                                                                                                                                                                                                                                                                                       | AND |                                                                                                                                                           | AND |                                                                                                                                                                                                              | AND |                                                                                                                                                                                                                                                                         |
|---------------------------------------------------------------------------------------------------------------------------------------------------------------------------------------|-----|-----------------------------------------------------------------------------------------------------------------------------------------------------------------------------------------------------------------------------------------------------------------------------------------------------------------------|-----|-----------------------------------------------------------------------------------------------------------------------------------------------------------|-----|--------------------------------------------------------------------------------------------------------------------------------------------------------------------------------------------------------------|-----|-------------------------------------------------------------------------------------------------------------------------------------------------------------------------------------------------------------------------------------------------------------------------|
| woman                                                                                                                                                                                 |     | experience                                                                                                                                                                                                                                                                                                            |     | normal                                                                                                                                                    |     | childbirth                                                                                                                                                                                                   |     | qualitative design                                                                                                                                                                                                                                                      |
| <ul style="list-style-type: none"> <li>• wom* OR</li> <li>mother* OR</li> <li>maternal* OR</li> <li>primip* OR</li> <li>multip* OR</li> <li>paturient* OR</li> <li>female*</li> </ul> |     | <ul style="list-style-type: none"> <li>• experienc* OR</li> <li>percept* OR</li> <li>emotion* OR</li> <li>thought* OR</li> <li>feeling* OR</li> <li>view* OR</li> <li>opinion* OR</li> <li>recall* OR</li> <li>memor* OR</li> <li>satisfact* OR</li> <li>cognit* OR</li> <li>behavio* OR</li> <li>insight*</li> </ul> |     | <ul style="list-style-type: none"> <li>• normal OR</li> <li>natural* OR</li> <li>uncomplicat*</li> <li>OR undistrurb*</li> <li>OR physiologic*</li> </ul> |     | <ul style="list-style-type: none"> <li>• childbirth OR</li> <li>"child birth" OR</li> <li>child-birth OR</li> <li>birth* OR labour</li> <li>OR labor OR</li> <li>delivery OR</li> <li>intrapartum</li> </ul> |     | <ul style="list-style-type: none"> <li>• qualitat* OR</li> <li>interview* OR</li> <li>narrat* OR</li> <li>synthes* OR</li> <li>"focus group*"</li> <li>OR ethnograph*</li> <li>OR "grounded</li> <li>theory" OR</li> <li>phenomenolog*</li> <li>OR discourse</li> </ul> |

or peer review only

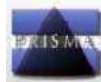

# PRISMA 2009 Checklist

| Section/topic                      | #  | Checklist item                                                                                                                                                                                                                                                                                              | Reported on page # |
|------------------------------------|----|-------------------------------------------------------------------------------------------------------------------------------------------------------------------------------------------------------------------------------------------------------------------------------------------------------------|--------------------|
| <b>TITLE</b>                       |    |                                                                                                                                                                                                                                                                                                             |                    |
| Title                              | 1  | Identify the report as a systematic review, meta-analysis, or both.                                                                                                                                                                                                                                         | 1                  |
| <b>ABSTRACT</b>                    |    |                                                                                                                                                                                                                                                                                                             |                    |
| Structured summary                 | 2  | Provide a structured summary including, as applicable: background; objectives; data sources; study eligibility criteria, participants, and interventions; study appraisal and synthesis methods; results; limitations; conclusions and implications of key findings; systematic review registration number. | 4                  |
| <b>INTRODUCTION</b>                |    |                                                                                                                                                                                                                                                                                                             |                    |
| Rationale                          | 3  | Describe the rationale for the review in the context of what is already known.                                                                                                                                                                                                                              | 5                  |
| Objectives                         | 4  | Provide an explicit statement of questions being addressed with reference to participants, interventions, comparisons, outcomes, and study design (PICOS).                                                                                                                                                  | 5                  |
| <b>METHODS</b>                     |    |                                                                                                                                                                                                                                                                                                             |                    |
| Protocol and registration          | 5  | Indicate if a review protocol exists, if and where it can be accessed (e.g., Web address), and, if available, provide registration information including registration number.                                                                                                                               | 6                  |
| Eligibility criteria               | 6  | Specify study characteristics (e.g., PICOS, length of follow-up) and report characteristics (e.g., years considered, language, publication status) used as criteria for eligibility, giving rationale.                                                                                                      | 22                 |
| Information sources                | 7  | Describe all information sources (e.g., databases with dates of coverage, contact with study authors to identify additional studies) in the search and date last searched.                                                                                                                                  | 7                  |
| Search                             | 8  | Present full electronic search strategy for at least one database, including any limits used, such that it could be repeated.                                                                                                                                                                               | 21, 25             |
| Study selection                    | 9  | State the process for selecting studies (i.e., screening, eligibility, included in systematic review, and, if applicable, included in the meta-analysis).                                                                                                                                                   | 7                  |
| Data collection process            | 10 | Describe method of data extraction from reports (e.g., piloted forms, independently, in duplicate) and any processes for obtaining and confirming data from investigators.                                                                                                                                  | 7                  |
| Data items                         | 11 | List and define all variables for which data were sought (e.g., PICOS, funding sources) and any assumptions and simplifications made.                                                                                                                                                                       | 7                  |
| Risk of bias in individual studies | 12 | Describe methods used for assessing risk of bias of individual studies (including specification of whether this was done at the study or outcome level), and how this information is to be used in any data synthesis.                                                                                      | 7                  |
| Summary measures                   | 13 | State the principal summary measures (e.g., risk ratio, difference in means).                                                                                                                                                                                                                               | -                  |
| Synthesis of results               | 14 | Describe the methods of handling data and combining results of studies, if done, including measures of consistency (e.g., $I^2$ ) for each meta-analysis.                                                                                                                                                   | 7                  |

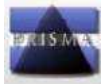

# PRISMA 2009 Checklist

| Section/topic                 | #  | Checklist item                                                                                                                                                                                           | Reported on page # |
|-------------------------------|----|----------------------------------------------------------------------------------------------------------------------------------------------------------------------------------------------------------|--------------------|
| Risk of bias across studies   | 15 | Specify any assessment of risk of bias that may affect the cumulative evidence (e.g., publication bias, selective reporting within studies).                                                             | -                  |
| Additional analyses           | 16 | Describe methods of additional analyses (e.g., sensitivity or subgroup analyses, meta-regression), if done, indicating which were pre-specified.                                                         | 7                  |
| <b>RESULTS</b>                |    |                                                                                                                                                                                                          |                    |
| Study selection               | 17 | Give numbers of studies screened, assessed for eligibility, and included in the review, with reasons for exclusions at each stage, ideally with a flow diagram.                                          | 22                 |
| Study characteristics         | 18 | For each study, present characteristics for which data were extracted (e.g., study size, PICOS, follow-up period) and provide the citations.                                                             | 23                 |
| Risk of bias within studies   | 19 | Present data on risk of bias of each study and, if available, any outcome level assessment (see item 12).                                                                                                | -                  |
| Results of individual studies | 20 | For all outcomes considered (benefits or harms), present, for each study: (a) simple summary data for each intervention group (b) effect estimates and confidence intervals, ideally with a forest plot. | -                  |
| Synthesis of results          | 21 | Present results of each meta-analysis done, including confidence intervals and measures of consistency.                                                                                                  | 8                  |
| Risk of bias across studies   | 22 | Present results of any assessment of risk of bias across studies (see Item 15).                                                                                                                          | -                  |
| Additional analysis           | 23 | Give results of additional analyses, if done (e.g., sensitivity or subgroup analyses, meta-regression [see Item 16]).                                                                                    | -                  |
| <b>DISCUSSION</b>             |    |                                                                                                                                                                                                          |                    |
| Summary of evidence           | 24 | Summarize the main findings including the strength of evidence for each main outcome; consider their relevance to key groups (e.g., healthcare providers, users, and policy makers).                     | 24                 |
| Limitations                   | 25 | Discuss limitations at study and outcome level (e.g., risk of bias), and at review-level (e.g., incomplete retrieval of identified research, reporting bias).                                            | 13                 |
| Conclusions                   | 26 | Provide a general interpretation of the results in the context of other evidence, and implications for future research.                                                                                  | 13                 |
| <b>FUNDING</b>                |    |                                                                                                                                                                                                          |                    |
| Funding                       | 27 | Describe sources of funding for the systematic review and other support (e.g., supply of data); role of funders for the systematic review.                                                               | 7                  |

From: Moher D, Liberati A, Tetzlaff J, Altman DG, The PRISMA Group (2009). Preferred Reporting Items for Systematic Reviews and Meta-Analyses: The PRISMA Statement. PLoS Med 6(7): e1000097. doi:10.1371/journal.pmed1000097

For more information, visit: [www.prisma-statement.org](http://www.prisma-statement.org).

# BMJ Open

## WOMEN ' S PSYCHOLOGICAL EXPERIENCES OF PHYSIOLOGICAL CHILDBIRTH: A META SYNTHESIS

|                                 |                                                                                                                                                                                                                                                                                                                                                                                                                                                                                                                                                                                                                                                                                                                                                                                                                                                                                                                                                                                                                                                                                                              |
|---------------------------------|--------------------------------------------------------------------------------------------------------------------------------------------------------------------------------------------------------------------------------------------------------------------------------------------------------------------------------------------------------------------------------------------------------------------------------------------------------------------------------------------------------------------------------------------------------------------------------------------------------------------------------------------------------------------------------------------------------------------------------------------------------------------------------------------------------------------------------------------------------------------------------------------------------------------------------------------------------------------------------------------------------------------------------------------------------------------------------------------------------------|
| Journal:                        | <i>BMJ Open</i>                                                                                                                                                                                                                                                                                                                                                                                                                                                                                                                                                                                                                                                                                                                                                                                                                                                                                                                                                                                                                                                                                              |
| Manuscript ID                   | bmjopen-2017-020347.R1                                                                                                                                                                                                                                                                                                                                                                                                                                                                                                                                                                                                                                                                                                                                                                                                                                                                                                                                                                                                                                                                                       |
| Article Type:                   | Research                                                                                                                                                                                                                                                                                                                                                                                                                                                                                                                                                                                                                                                                                                                                                                                                                                                                                                                                                                                                                                                                                                     |
| Date Submitted by the Author:   | 06-Jun-2018                                                                                                                                                                                                                                                                                                                                                                                                                                                                                                                                                                                                                                                                                                                                                                                                                                                                                                                                                                                                                                                                                                  |
| Complete List of Authors:       | Olza, Ibone; Universidad de Alcala de Henares Facultad de Medicina y Ciencias de la Salud, Medicina y Especialidades Médicas<br>Leahy-Warren, Patricia; Catherine McAuley School of Nursing and Midwifery, University College Cork, , Nursing and Midwifery<br>Benyamini, Yael; Tel Aviv University<br>Kazmierczak, Maria; Uniwersytet Gdanski, Institute of Psychology<br>Karlsdottir, Sigfridur Inga; University of Akureyri, Iceland, Health Sciences<br>Spyridou, Andria; Universitat Konstanz Fachbereich Psychologie<br>Crespo-Mirasol, Esther; University of Barcelona, Hospital Clinic<br>Takacs, Lea; Charles University, Department of Psychology<br>Hall, Priscilla J.; Emory University. Nell Hodgson Woodruff School of Nursing.<br>Murphy, Margaret; University College Cork National University of Ireland, Nursing and Midwifery<br>Jonsdottir, Sigridur Sia; Haskolinn a Akureyri, Health Sciences<br>Downe, Soo; University of Central Lancashire, research in childbirth and health<br>Nieuwenhuijze, Marianne; Zuyderland Medisch Centrum Heerlen, Research Centre for Midwifery Science |
| <b>Primary Subject Heading</b>: | Obstetrics and gynaecology                                                                                                                                                                                                                                                                                                                                                                                                                                                                                                                                                                                                                                                                                                                                                                                                                                                                                                                                                                                                                                                                                   |
| Secondary Subject Heading:      | Qualitative research                                                                                                                                                                                                                                                                                                                                                                                                                                                                                                                                                                                                                                                                                                                                                                                                                                                                                                                                                                                                                                                                                         |
| Keywords:                       | Childbirth, Physiological Childbirth, Lived experiences, Psychological, empowerment, OBSTETRICS                                                                                                                                                                                                                                                                                                                                                                                                                                                                                                                                                                                                                                                                                                                                                                                                                                                                                                                                                                                                              |
|                                 |                                                                                                                                                                                                                                                                                                                                                                                                                                                                                                                                                                                                                                                                                                                                                                                                                                                                                                                                                                                                                                                                                                              |

SCHOLARONE™  
Manuscripts

# Women's psychological experiences of physiological childbirth: a meta synthesis.

## Authors:

**Corresponding author: Olza, Ibone.** MD, PhD, D. Psychiatrist. Associate Professor at Universidad de Alcala de Henares, Faculty of Medicine. Campus Universitario - C/ 19, Av. de Madrid, Km 33,600. Madrid, ES 28871.

ORCID #: [0000-0002-9614-9496](https://orcid.org/0000-0002-9614-9496) Email: [ibone.olza@uah.es](mailto:ibone.olza@uah.es)

2. **Leahy-Warren, Patricia.** Principal Investigator Nursing and Midwifery. Senior Lecturer. Nursing & Midwifery University College Cork, Ireland.  
Researcher ID: D-5415-2014. Email: [Patricia.Leahy@ucc.ie](mailto:Patricia.Leahy@ucc.ie)

3. **Benyamini, Yael.** PhD. Professor. Bob Shapell School of Social Work. Tel Aviv University. Tel Aviv 69978 ISRAEL.  
ORCID # 0000-0001-5110-8212 Email: [benyael@post.tau.ac.il](mailto:benyael@post.tau.ac.il)

4- **Kazmierczak, Maria.** Ph.D. Associate Professor in Psychology. Institute of Psychology. University of Gdansk Gdansk, Poland.  
Email: [psymk@ug.edu.pl](mailto:psymk@ug.edu.pl)

5. **Karlsdottir, Sigfridur Inga.** Ph.D. Associate professor School of Health Sciences. University of Akureyri, Iceland  
Email: [inga@unak.is](mailto:inga@unak.is)

6. **Spyridou, Andria.** Ph.D. University of Konstanz, Department of Psychology, Scientific Collaborator. Konstanz, Baden-Württemberg, DE  
ORCID #: [orcid.org/0000-0002-2415-6240](https://orcid.org/0000-0002-2415-6240) Email: [andria.spyridou@uni-konstanz.de](mailto:andria.spyridou@uni-konstanz.de)

7. **Crespo-Mirasol, Esther.** Ph.D. Universitat Barcelona, Hospital Clinic, Midwifery, Barcelona, Catalunya, ES.  
Email: [ecrespo@clinic.ub.es](mailto:ecrespo@clinic.ub.es)

8. **Takács, Lea.** M.A., Ph.D. Lecturer, Researcher Faculty of Arts, Charles University, Department of Psychology. Prague, Czech Republic.  
Email: [lea.takacs@ff.cuni.cz](mailto:lea.takacs@ff.cuni.cz)

9. **Hall, Priscilla J.** PhD CNM. Emory University. Nell Hodgson Woodruff School of Nursing. USA.  
Email: [pjhall@emory.edu](mailto:pjhall@emory.edu)

10. **Murphy, Margaret.** University College Cork National University of Ireland, Nursing and Midwifery Cork, IE  
ORCID ID: [orcid.org/0000-0001-9979-9462](https://orcid.org/0000-0001-9979-9462) Email: [mgt.murphy@ucc.ie](mailto:mgt.murphy@ucc.ie)

1  
2  
3  
4 11. **Jonsdottir, Sigridur Sia**. Assistant professor. School of Health Science, University  
5 of Akureyri, Akureyri, Iceland  
6 ORCID ID: 0000-0002-5152-3173 Email: [siaj@unak.is](mailto:siaj@unak.is)  
7

8 12. **Downe, Soo**. Ph.D. Professor of Midwifery Studies. University of Central  
9 Lancashire. UK.  
10 ORCID ID: 0000-0003-2848-2550 Email: [sdowne@uclan.ac.uk](mailto:sdowne@uclan.ac.uk)  
11

12 13. **Nieuwenhuijze, Marianne J**. PhD. Professor of Midwifery. Research Centre for  
13 Midwifery Science Maastricht, Zuyd University, The Netherlands.  
14 Email: [m.nieuwenhuijze@av-m.nl](mailto:m.nieuwenhuijze@av-m.nl)  
15

16  
17 All authors conceived and designed the study. Marianne Nieuwenhuijze and Patricia  
18 Leahy Warren organised and conducted the search. Ibone Olza, Patricia Leahy-Warren,  
19 Yael Benyamini, Marianne Nieuwenhuijze, Esther Crespo, Andria Spyridou, Maria  
20 Kazmierczak, Lea Takacs, Margaret Murphy and Sia Jonsdottir participated in the  
21 selection of the relevant articles. Ibone Olza and Esther Crespo Mirasol performed the  
22 quality assessment of the studies. Ibone Olza did the data extraction from the studies  
23 and drafted the manuscript. Ibone Olza, Patricia Leahy-Warren, Yael Benyamini,  
24 Marianne Nieuwenhuijze, Andria Spyridou, Maria Kazmierczak, Sia Jonsdottir, Inga  
25 Karlsdottir, Priscilla Hall and Soo Downe interpreted the results, critically revised the  
26 manuscript for important intellectual content, and contributed to and approved the final  
27 version. Marianne Nieuwenhuijze, Soo Downe and Patricia Leahy Warren supervised  
28 the project. Yael Benyamini, Priscilla J.Hall, Soo Downe, Maria Kasmierczak, Patricia  
29 Leahy-Warren, Marianne Nieuwenhuijze and Ibone Olza made the changes and  
30 corrections suggested by the reviewers.  
31

32  
33 **Source of support:** EU COST ACTION IS 1405 BIRTH: BUILDING  
34 INTRAPARTUM RESEARCH THROUGH HEALTH  
35 ([http://www.cost.eu/COST\\_Actions/isch/IS1405](http://www.cost.eu/COST_Actions/isch/IS1405))  
36

37 **Word count:** 5.502 words  
38

39 **Numbers of figures and tables:**  
40

41 Figure 1. Flow chart  
42

43 Table 1: Characteristics of selected studies  
44

45 Table 2: Themes, subthemes and studies contributing/thematic table and studies  
46 contributing to each finding.  
47

48 Appendix 1: Search Terms  
49

50 Supplementary File: CASP and COREQ tables  
51

52 **Competing interests statement:** None  
53  
54  
55  
56  
57  
58  
59  
60

**Data Sharing Statement: Additional unpublished data only available to authors.**

## **Abstract**

**Objective:** To synthesize qualitative studies on women's psychological experiences of physiological childbirth

**Design:** Meta-synthesis

**Methods:** Studies exploring women's psychological experiences of physiological birth using qualitative methods were eligible. The research group searched the following databases: MEDLINE, CINAHL, PsycINFO, PsycARTICLES, SocINDEX and Psychology and Behavioural Sciences Collection. Key authors were contacted and we searched reference lists of collected articles. Quality assessment was done independently using the Critical Appraisal Skills Programme (CASP) checklist. Studies were synthesized using techniques of meta-ethnography.

**Results:** Eight studies involving 94 women were included. Three third order interpretations were identified: 'maintaining self confidence in early labour', 'withdrawing within as labour intensifies' and 'the uniqueness of the birth experience'. Using the first, second and third order interpretations, a line of argument developed that demonstrated the empowering journey of giving birth encompassing the various emotions, thoughts and behaviours that women experience during birth.

**Conclusion:** Giving birth physiologically is an intense and transformative psychological experience that generates a sense of empowerment. The benefits of this process can be maximised through physical, emotional and social support for women, enhancing their belief in their ability to birth and not disturbing physiology unless it is necessary. Health care professionals need to take cognisance of the empowering effects of the psychological experience of physiological childbirth. Further research to validate the results from this study is necessary.

## **Strength and limitations**

- Research protocol was registered (PROSPERO Registration CRD42016037072) and published.
- Strict inclusion criteria were applied so that only studies where all women had unmedicated births were included.
- Some births had occurred more than 10 years before. Parity was not differentiated as a criteria.
- All selected studies came from high income countries.
- All births were attended by midwives and a relatively large number of women included in this study had a home birth.



1  
2  
3  
4  
5 **KEYWORDS: Physiological Childbirth, Psychology, Lived experience,**  
6 **Empowerment**  
7  
8  
9

## 10 11 12 13 **Introduction**

14  
15 Childbirth is a profound psychological experience that has a physical,  
16 psychological, social and existential impact in both the short and longer term (1). It  
17 leaves lifelong vivid memories for women (2). The effects of a birth experience can be  
18 positive and empowering, or negative and traumatizing (3-5). Regardless of their  
19 cultural background, women need to share their birth stories to integrate fully an  
20 experience that is both physically and emotionally intense (6).  
21

22  
23 Neurobiologically, childbirth is directed by hormones produced both by the  
24 maternal and the fetal brain(7). During childbirth and immediately after delivery both  
25 brains are immersed in a very specific neurohormonal scenario, impossible to reproduce  
26 artificially. The psychology of childbirth is likely to be mediated by these neuro  
27 hormones, as well as by particular cultural and personal issues. The peaks of  
28 endogenous oxytocin during labour, together with the progressive release of endorphins  
29 in the maternal brain, are likely to cause the altered state of consciousness most typical  
30 of unmedicated labor that midwives and mothers easily recognise or describe as “labor  
31 land” but that has received little attention from neuropsychology.  
32

33  
34 Midwives and obstetricians require a deep understanding of the emotional  
35 aspects of childbirth in order to meet the emotional and psychosocial needs of labouring  
36 women. Factors that facilitate a positive birth experience include having a sense of  
37 control during birth, an opportunity for active involvement in care, and support and  
38 responsive care from others in relation to women’s experience of labour pain (8-10).  
39 There is limited research on women’s lived experience of physiological childbirth,  
40 including their emotional response (11-13). This lack of knowledge concerning the  
41 psychological dimension of childbirth can lead to mismanagement of the birthing  
42 process. At the extreme, a lack of understanding of the psychology of childbirth can  
43 contribute to a traumatizing birth, which can be devastating to women even when the  
44 immediate outcome is a physically healthy mother and newborn (14). When women in  
45 labour encounter caregivers who do not incorporate emotional needs into their care,  
46 women can experience this as disrespect, mistreatment or in some instances, as a form  
47 of abuse (15) or obstetric violence (16). The problem of disrespect towards women in  
48 labour is a growing concern globally, as is also the over application of medicalized care  
49 practices for healthy women (17-19). Rates for these interventions vary greatly between  
50 and within countries. For example, using 2010 Euro-peristat data, Macfarlane et al  
51 (2016) reported on a range in spontaneous vaginal birth from 45.3%-78.5% (20).  
52

53  
54 The medical model has traditionally divided labour into stages according to  
55 mechanical or physical changes such as dilation of the cervix and descent of the head as  
56 depicted on the traditional Friedman’s curve or WHO partograph (21). However, the  
57  
58  
59

1  
2  
3  
4 subjective, emotional experience of labour does not conform to these mechanical  
5 descriptions of the body's changes. It is questionable that women experience specific  
6 stages or phases as traditionally described by professionals (22). Understanding the  
7 psychological experience in physiological childbirth can contribute to enhancing a  
8 salutogenic ('wellbeing') approach to health, can contribute to the promotion of  
9 healthy, happy family relationships in the longer run  
10

11 The aim of this systematic review is to locate and synthesise published  
12 qualitative studies that describe the psychological process of women during  
13 physiological childbirth, paying attention to the immanent psychological responses that  
14 emerge during the process of labour and birth. We hypothesised that there is a common  
15 psychological experience of physiological labour. We focus on laboring women's  
16 thoughts and feelings, and the meanings they ascribe to their perceptions of childbirth  
17 process and the surrounding environment, as reaction to both childbirth and to the  
18 surrounding environment are part of a single psychological process. We refer to the  
19 psychological process we are interested in by the Husserlian term "lived experience",  
20 adopting a phenomenological theoretical lens for the analysis of the data in the included  
21 studies.  
22  
23

## 24 **Methods**

### 25 **Design**

26 We undertook a metasynthesis. This is a process of reviewing and consolidating  
27 qualitative research, to create a summary of qualitative findings and allow for the  
28 development of new interpretations (Thomas & Harden, 2008). Qualitative synthesis of  
29 a number of qualitative studies provides robust evidence to inform health care practices.  
30 Meta-ethnography was deemed to most appropriate qualitative synthesis approach for  
31 this analysis in order to transcend the findings of individual study accounts in  
32 developing a conceptual model (23). This synthesis method has the potential to provide  
33 a higher level of analysis and generate new conceptual understandings (24). The  
34 research approach used for this meta-synthesis was the seven-step process described by  
35 Noblit and Hare (25,26), which uses meta-ethnographic techniques like reciprocal and  
36 refutational techniques as well as line of argument synthesis. The research group used  
37 the Preferred Reporting Items for Systematic Reviews and Meta-Analyses (PRISMA)  
38 statements to inform the meta-synthesis (27). The research protocol was registered and  
39 published in the International Prospective Register of Systematic Reviews  
40 (PROSPERO) (Registration CRD42016037072) (28). Ethical approval was not required  
41 for this systematic review.  
42  
43

### 44 **Patient and Public Involvement: not involved**

### 45 **Data sources**

46 A systematic search was conducted in March 2016, and updated in October  
47 2017. The following databases were included: EBSCOhost, including the database  
48 MEDLINE, CINAHL, PsycINFO, PsycARTICLES, SocINDEX and Psychology and  
49 Behavioural Sciences Collection. The search terms are given in appendix 1. Eligible  
50 papers were written in English, Spanish and Portuguese. Five groups of two authors  
51  
52  
53  
54  
55  
56  
57  
58  
59  
60

1  
2  
3  
4 independently read the abstracts and selected articles, and the decision to include an  
5 article was achieved by consensus. When there was disagreement, a third author  
6 provided assistance and input. The research team searched reference lists of the  
7 included articles to identify additional articles that were relevant to the study question.  
8 We sought suggestions from experts in the field and articles from other sources.  
9

### 10 **Eligibility criteria for selecting studies**

11 For the purpose of our study, physiological childbirth was defined as an  
12 uninterrupted process without major interventions, such as induction, augmentation,  
13 instrumental assistance, caesarean section as well as use of epidural anaesthesia or other  
14 pain relief medications. The inclusion criteria were: (1) original research of (2) women  
15 who had physiological childbirth and (3) described their experiences and behaviours  
16 during (4) the whole process of childbirth. Studies were excluded, if the experience of  
17 childbirth was (1) described by any source other than the woman who experienced the  
18 birth (e.g. from health care professionals), (2) described only a single stage in the birth  
19 process or (3) described births with major medical and surgical interventions or pain  
20 management, e.g. caesarean section. To ensure the quality of the findings in the study,  
21 all selected papers were screened on the methodological quality using CASP (29) and  
22 subsequently, all the included papers were assessed using COREQ (30) to ensure they  
23 had reported all the relevant details of their methodological and analytic approach.  
24  
25

### 26 **Data extraction and synthesis**

27 Data analysis included the following steps. The first order interpretation  
28 involved reading and re-reading all studies to become familiar with their content,  
29 feeling and tone. The first author (IO) conducted a line by line coding of the findings of  
30 all included studies. Quotes, interpretations and explanations in the original studies were  
31 treated as data. The coding categories included: feelings, behaviours (actions), signs  
32 (e.g. pain, contractions), relations (midwife, partner, baby, and relatives), time  
33 perception, cognitions (thoughts and knowledge), location (home, water, places,  
34 transferring). Based on the emerging data, these coding categories were sorted into (1)  
35 early labour, (2) intense labour, (3) pushing, (4) baby out (immediately), (5) placenta  
36 and (6) evaluation of the whole birth experience.  
37  
38

39 To achieve the second and third order interpretation, the collaborative authors  
40 reflected on the first order interpretations to identify the themes and subthemes that  
41 describe the emerging constructs grounded in the primary studies. This process included  
42 reciprocal (similarity) and refutational (contradictory) analysis which identified  
43 differences, divergences, and dissonance between the studies and then to synthesise  
44 these translations. Following this reflection process, the research team used a line of  
45 argument to create a model that best explains the psychological process of physiological  
46 childbirth, as described in the included studies.  
47

### 48 *Reflexivity*

49 Throughout the research process, the authors identified and explored their own  
50 views and opinions as possible influences on the decisions taken. This was done  
51 because of the subjective nature of qualitative research to protect the methodological  
52 rigor of the study. All of the authors of this paper are part of an EU-funded COST  
53 Action specifically examining aspects of physiological birth. The research  
54 group/authors have chosen to participate in the COST Action because of strong beliefs  
55  
56  
57  
58  
59

1  
2  
3  
4 in the importance of understanding physiological and psychological processes of  
5 childbirth, to enhance the capacity of women to labour and give birth normally where  
6 this was possible for them, and where it is their choice to do so. All the authors believe  
7 that birth is a profound physiological, psychological, and socio-cultural experience for  
8 most women and babies.

9 The research team included authors of multidisciplinary backgrounds. The  
10 contribution of each author, coming from different paradigms and perspectives on  
11 women's needs in labour ensured the interpretation of findings was grounded in the data  
12 and came from the data. The use of refutational analyses, as recommended by Noblit &  
13 Hare (20, 21) minimizes the risk of overlooking information because it did not fit with  
14 the authors pre-conceptions. This strengthens the trustworthiness of this research.  
15

16  
17 **Data Sharing Statement: Additional unpublished data only available to authors.**  
18

## 19 20 21 **Results**

### 22 23 **Included studies**

24  
25 The search identified 1520 articles in EBSCOhost. There were 376 duplicates,  
26 which were removed, leaving 1144 unique articles in the sample. Figure 1 demonstrates  
27 the selection process, which resulted in eight included studies. All of the selected  
28 studies met the quality screening and assessment criteria. Some very relevant papers had  
29 to be excluded because just one or a few participants did not have a physiological birth  
30 as defined for this study. CASP and COREQ assessments are detailed in the  
31 supplementary files.  
32

33 The eight included studies involved 94 women, 28 primiparous and 22  
34 multiparous women, although four studies did not identify parity in their sample. Of  
35 these, two studies had a mix of primiparous and multiparous women (half each) (17, 27)  
36 and two studies did not address parity for the sample at all (28, 29). Most of the  
37 interviews took place within a year after birth, but some studies had longer intervals,  
38 and in two studies, women were interviewed up to 10 or 20 years after birth (11,31).  
39 One study did not identify a time interval between the index birth and the interview  
40 (32). Thirty-nine of the women gave birth at home, four in a primary care unit and 51 in  
41 hospital. It seems that midwives were the primary carers of these women. Further  
42 characteristics of the studies can be found in Table 1.  
43  
44  
45  
46  
47  
48  
49  
50  
51  
52  
53  
54  
55  
56  
57  
58  
59  
60

TABLE 1. Characteristics of selected studies

| AUTHOR(S) / YEAR                         | TITLE                                                                                                 | COUNTRY     | METHODOLOGY                                              | N PARITY               | TIME AFTER BIRTH    | BIRTH SETTING                                                             | OBJECTIVE                                                                        |
|------------------------------------------|-------------------------------------------------------------------------------------------------------|-------------|----------------------------------------------------------|------------------------|---------------------|---------------------------------------------------------------------------|----------------------------------------------------------------------------------|
| 1. Aune et al. 2015(3)                   | Promoting a normal birth and a positive birth experience – Norwegian women's perspectives             | Norway      | Qualitative, focused on salutogenic principles           | 12 prim                | 5 -6 weeks          | Hospital birth unit.                                                      | To understand factors important for a normal birth and positive birth experience |
| 2. Dixon et al. 2014(13)                 | The emotional journey of labour-women's perspectives of the experience of labour moving towards birth | New Zealand | Critical feminist standpoint methodology                 | 6 prim<br>12 multi     | 6 months            | Midwifery continuity care: 7 homebirths, 4 primary care, 7 tertiary care. | To explore women's experiences of birth                                          |
| 3. Hall & Holloway 1998 (33)             | Staying in control: Women's experiences of labour in water                                            | UK          | Grounded theory, using the constant comparative method'. | 9<br>(no parity given) | 48 hours            | Hospital (water birth)                                                    | To examine women's attempt at control during labour in the water                 |
| 4. Halldorsdottir & Karlsdottir 1996(11) | Journeying through labour and delivery: Perceptions of women who have given birth                     | Iceland     | Phenomenological perspective                             | 14<br>(mix of parity)  | 2 months to 20 yrs. | Hospital                                                                  | To explore experience of giving birth                                            |
| 5. Leap et al. 2010(34)                  | Journey to confidence: Women's experiences of pain in labour and relational continuity of care        | UK          | Qualitative, descriptive, thematic analysis              | 5 prim<br>5 multi      | 4 weeks             | Albany midwifery practice, home and hospital                              | To explore women's view of continuity of care and pain in labour                 |
| 6. Ng & Sinclair 2002(32)                | Women's experience of planned home birth: A phenomenological study                                    | UK          | Phenomenological perspective                             | 9<br>(no parity given) | Not mentioned       | Homebirths                                                                | To explore women's lived experiences of planned homebirth                        |
| 7. Reed, Barnes & Rowe 2016(12)          | Women's experience of birth: Childbirth as a rite of passage                                          | Australia   | Narrative approach, rites of passage theory.             | 5 prim<br>5 multi      | 6 months            | 6 hospital births, 4 homebirths                                           | To explore women's experiences of physiological childbirth                       |
| 8. Sjöblom et al. 2006(31)               | A qualitative study of women's experiences of home birth in Sweden                                    | Sweden      | Phenomenological–hermeneutic method.                     | 12<br>(mix of parity)  | Less than 10 years  | Homebirths                                                                | To illuminate the experience of giving birth at home                             |

1  
2  
3  
4  
5  
6  
7  
8  
9  
10  
11  
12  
13  
14  
15  
16  
17  
18  
19  
20  
21  
22  
23  
24  
25  
26  
27  
28  
29  
30  
31  
32  
33  
34  
35  
36  
37  
38  
39  
40  
41  
42  
43  
44  
45  
46  
47  
48  
49  
50  
51  
52  
53  
54  
55  
56  
57  
58  
59  
60

For peer review only

### Meta-synthesis analysis

Three main themes emerged: *maintaining self-confidence in early labour*, *withdrawing within as labour intensifies* and *the uniqueness of the birth experience*. A number of subthemes were identified within each of the three main themes, which are listed on Table 2.

TABLE 2. Themes, subthemes and studies contributing/thematic table and studies contributing to each finding

| Main themes                                            | Sub themes                        | Studies             |
|--------------------------------------------------------|-----------------------------------|---------------------|
| <b>Maintaining self-confidence during early labour</b> |                                   | 3,20-22,31, 32,34   |
|                                                        | Experiencing the start of labour  | 3,20-22,31, 32,34   |
|                                                        | Sharing the beginning of labour   | 3,20-22,31, 32,34   |
|                                                        | Keeping life normal               | 3,21, 22,31, 32,34  |
| <b>Withdrawing within as labour intensifies</b>        |                                   | 3, 20-22, ,32-34    |
|                                                        | Accepting the intensity of labour | 3, 20-22, 31, 32,34 |
|                                                        | Going to an inner world           | 3,20-22,31,33       |
|                                                        | Coming back to push               | 3,20-22,32, 34      |
| <b>Uniqueness of the birth experience</b>              |                                   | 3,20-22, 31,32,34   |
|                                                        | Reaching the glorious zenith      | 3,20-22, 31,32,34   |
|                                                        | Meeting the baby                  | 20-22, 31,32,34     |
|                                                        | Empowered self                    | 3,20-22, 31,32, 34  |
| <b>The empowering journey of giving birth</b>          |                                   | 3, 20-22, 31,32, 34 |

## **I. Maintaining self-confidence in early labour**

This theme presents women's experiences when they realised that they were in labour. The accounts indicated that women knew when they were in labour and most preferred to wait calmly for progress, maintaining confidence by keeping a familiar routine and environment.

### ***Experiencing the start of labour***

Women described their feelings when they realised that they were in early labour. Some felt excited and others described a lovely feeling, comparing it to Christmas (13) (p372). A mixture of feelings emanated from the data at this time, including excitement, happiness, calm, sometimes mixed with apprehension and anxiety (3,11,34).

Women found it important to conserve their emotional strength and to maintain a positive attitude (3,11). Some described being happy with staying in their own home, and felt it was important to keep calm:

*"I felt confident by staying in my own living room" (3, p.724).*

They acknowledged the close and trustful relationships in their network at that time in their life (3,13,31).

*"Thought it was reassuring to be together with family in familiar surroundings" (3, p.724).*

### ***Sharing the beginning of labour***

When women recognised the beginning of labour, they shared it with other women. Usually they called their mother or sister, before calling the midwife or the hospital (12,13). Few asked their midwife to be with them at this point.

*"At 10 o'clock in the morning I called the hospital. Of course, I had talked to my mom first" (3, p. 274).*

They indicated that it was important for them to know their midwife because it gave them confidence and trust (3,12,13,32,34)



### ***Keeping life normal***

The most common behaviour at the onset of labour appeared to be continuing with the usual routine. There were many descriptions of wanting to remain at home, taking a shower, being aware of others' needs (like older children or even pets) and waiting happily. Their own home with their relatives and partners around them (3,11,34) was a tranquil place to be while their contractions were becoming more intense and the pain was increasing (3,11).

*"I was lying all night and with my labour pains and my dog came and lay by my feet...it was an incredible feeling, it was in September, all the apples in the trees...it was all so silent..."* ((31), p. 352).

## **II. Withdrawing within as labour intensifies**

As the labour intensifies, women withdrew into an inner world where time seemed to be suspended. Women described how this inner space allowed them to concentrate on the labouring process, and this facilitated feeling that they could manage. The experience of control was complex and nuanced – for some, the sense of being in control was directed at making all of the decisions and for others, it was achieved by feeling safe enough to hand over control (or guardianship) to the midwife, so that they could retreat into their inner world of labouring.

### ***Accepting the intensity of labour***

When contractions became stronger and pain intensified, women felt the need to be fully focussed on the physical task (13). At this point women really needed to be with safe companions in a protected place. This was the moment to contact the midwife and /or move to the hospital.

*"I've got to be somewhere where I can actually allow myself to feel what I am going through"* ((13), p. 373).

The pain experience was framed by accepting pain as a natural part of childbirth, and this was important for women (3,32). Two key elements in the response to pain were trusting in the body and working with pain (3,11). Mobility was important in this phase, and women needed to move around (32) or submerge themselves in water (33). The following quote is an example of how women framed the pain experience to reduce fear.

*"I don't think it is explained very well what the pain is for. People just get frightened of the pain. If they could see it as something useful...the pain is there so as you can help them out, it's not frightening at all"* (, p.58).

Women described their desire to be in control, but this was different for the individual women. For some, control meant staying on top of things and deciding what they needed, whereas for others, control was the decision to hand over management to the midwives (33).

*"Not having any experience of labour, I needed the midwife to tell me what to do. Because she was in control I felt I was too"* ((33), p. 33).

1  
2  
3  
4 Women expressed their need for a caring approach (3,11,13,33). The support from  
5 midwives helped women to face the vulnerability they experienced during labour.

6 *Knowing the midwives so well makes you feel quite at ease, if you are scared and*  
7 *you haven't got anyone reassuring you, you are just panicking and it hurts a lot more*  
8 *(34) p 239)*

9 *"You are so incredibly vulnerable and I feel that you have such a need that*  
10 *someone is kind to you and shows you some interest. All your energy goes into giving*  
11 *birth to this child and you simply don't have energy left to argue with someone or*  
12 *make a fuss about something. You almost have to take whatever your surroundings*  
13 *offer you" ((11), p. 52).*

14 *All throughout she said to me: you are coping fine Linda, I felt assured. That was*  
15 *how she was making me feel calm All throughout she said to me: you are coping fine*  
16 *Linda, I felt assured. That was how she was making me feel calm(34) p239)*

17  
18  
19 *-A woman giving birth is perhaps much most sensitive or vulnerable that when she is*  
20 *not in labour. If for example the midwife or member of the staff hurt her in some way*  
21 *or says something inappropriate, then it drastically offsets your labour (11)p52*  
22

23  
24 They also described how important their partner was.

25 *"I felt he was my lifeline, he had the best analgesic effect on me and he did not*  
26 *leave me once" ((31), p. 352).*

27  
28  
29 Sometimes they needed to be alone with their partners yet still able to reach their  
30 midwife whenever they needed (33,34).

31 *"I felt like we were doing it ourselves which was nice. We didn't feel we needed*  
32 *the midwife all the time but she was there if we did"(33)p. 34).*

### 33 34 **Going to an inner world**

35  
36 Women described how they withdrew within themselves to an inner world, where  
37 they focused on the importance of living just in that moment. Words used included  
38 "narrowed", "zone", "faraway place", "another planet" and "private" (11-13,31).

39 *"Nothing else matters and the universe kind of shrinks to this particular, you*  
40 *know this particular job that you have to do which is you know about birthing your*  
41 *baby"(13), p. 373).*

42 *"Like with both my labours, I took myself away, I need not to have people looking*  
43 *at me" ((12), p. 49).*

44  
45  
46 Women described perceptions of an altered or suspended sense of time.

47 *"My sense of time was completely lost, as if I had forgotten it in a drawer at*  
48 *home. It was a very strange feeling. There are a lot of people around you and yet you*  
49 *are in your own world. Even if we were in the same room we were not in the same*  
50 *world..." ((11), p. 52).*

51  
52 Over time as the intensity of the contractions and the pain increased, women  
53 described feelings of fear and desperation (13). Some felt exhausted and deprived of  
54  
55  
56  
57  
58  
59

energy (11,32). The thought that they could not continue any more, expressing fears of death (11).

*"I was so optimistic in the beginning of the latter birth...I had given birth before and I survived...so that you believe you will survive. However, in both births I had this feeling for some time that I would never survive this" ((11), p. 56).*

*"I was requesting for a caesarean, I was requesting for everything! Because I just wanted to get over with it. I just said I was going to die. At one point I felt like I was going to faint and stuff like that. I said: 'Please Sandra, I want pain relief.' I was actually begging her, 'Please, please, please.' I said, 'I'm going to die! I won't be able to do this!'" ((34), p. 239).*

### **Coming back to push**

When starting to push, time was no longer suspended and women became more active (11,13).

*"When I started to push, it was as if a curtain was drawn. A totally different perception, suddenly I was awake, alert and quite aware of timing" ((11), p. 55).*

*"... I was at the top of the mountain when I started to push. And then I had to get down again. And that was it!" ((3), p. 725).*

### **III. Uniqueness of the birth experience**

With the birth of their baby women described relief, joy at meeting their baby, and sense of transformation.

#### **Reaching the glorious zenith**

Directly after birth, women described feelings of pride and joy in achieving and experiencing natural childbirth (11,13,32,34).

*"So I was brave, I was strong!... So I was like, 'Yes, I have done it! Yes, I can do it!' I was so happy. I honestly never had this kind of joy since I was born. I don't know where this joy came from. I don't know how to describe the endless joy that came in me" ((34), p. 239).*

*"What is most prominent in the birth experience as a whole is the sense of victory, the feeling of ecstasy when the baby is born. That feeling is unique, and in the last birth I was without all medication and therefore I could enjoy this feeling much better, well I enjoyed it completely" ((11), p. 57).*

Women described the intensity of their feelings of childbirth as being their greatest, unparalleled achievement.

*"It is an intense experience, a powerful life experience. It is naturally magnificent that you, just to find that you are capable of giving birth, to a child, that you can do it. To be such a perfect being that you can do it...the feeling you get when you get your new born child into your arms naturally is indescribable. It is a feeling you cannot compare with anything else. It is awe inspiring" (11)(p56).*

Women also expressed feelings of spiritual closeness and gratitude.

1  
2  
3  
4 *“I had this holiness, being close to the universe. I feel such gratitude for the*  
5 *possibility to give birth at home” ((31), p. 350).*  
6

7 Some women were also surprised and satisfied how effectively their body had  
8 taken them through the labour (13) and they were proud of how they managed their  
9 pain. This ability to manage labour pain positively influenced their confidence in  
10 becoming a mother (34).

11 *“I can’t really explain. I’m very pleased, very pleased, that I did it naturally. I*  
12 *feel so proud, full of myself, I am very proud to have him naturally. I am very proud*  
13 *even now.”((34), p. 239).*  
14

15 However, as well as being a unique and powerful experience, some women also  
16 expressed a need for a sense of peace, and of routine to ground themselves in the new  
17 reality of motherhood (32).  
18

### 19 **Meeting the baby**

20

21 Women described the speed with which they assured themselves that their baby  
22 looked normal.

23 *“I remember particularly that as soon as the baby is born you think incredibly fast*  
24 *and you look incredibly fast whether there are, without all doubts, ten toes and ten*  
25 *finger and everything that is supposed to be in place is there and many other*  
26 *things.”(11)(p56).*  
27  
28  
29

30 Women with other children were impatient for them to meet their new sibling. It  
31 was important for them to involve other family members soon after birth to share this  
32 important moment with them (32).  
33

34 *“As soon as I had the baby I’d had my bath and everything and my mum and*  
35 *everybody arrived...we were all in the garden with the baby” ((32), p. 58).*  
36

37 Women described a sense of being ‘cocooned’ within the family soon after the  
38 baby was born (34) and this was expressed in the manner in which the new baby was  
39 welcomed by hugs, kisses and expressions of love (31).  
40

41 *“By three o’clock everybody had left except for just ourselves, the four of us, the*  
42 *whole family, we were just tucked up across my bed and I think in some ways that*  
43 *was the moment that felt that this is absolutely right, there’s nothing more right in*  
44 *the world. I was just all so peaceful, so ---why would do anything differently kind of*  
45 *feeling to it” (29, p. 58).*  
46

47 The birth of the placenta was only mentioned in one study (19). For some  
48 women, it was anti-climactic after the birth of the baby, while others considered it a  
49 part of the recovery process.  
50

### 51 **Empowered-self**

52  
53  
54  
55  
56  
57  
58  
59  
60

1  
2  
3  
4 After processing their emotions, women described feeling different. They  
5 absorbed new knowledge and understanding about themselves and incorporated this  
6 into their sense of self. They talked about their birth as an empowering experience (12).

7 *"...I felt I could sense right then, when minutes passed by, I felt that I (tearful)*  
8 *was a little bit different"* ((11), p. 56).

9  
10 Women linked their pride about coping with pain to feeling strong and confident  
11 and to a positive start to new motherhood (34).

12 *"When you do that as a woman, you know you can do anything ... I realized how*  
13 *everything else in life is easy, if you can do that (enduring 70 hours of no sleep, wild*  
14 *contractions, etc.) you can do anything. I am sad that so many women don't get to*  
15 *understand this"* ((12), p. 52).

### 16 17 18 **The empowering journey of giving birth**

19 Constructing a line of argument is the next step in a meta-synthesis, based on the  
20 first, second and third order interpretations. For this study, the line of argument  
21 demonstrated 'the empowering journey of giving birth', encompassing the various  
22 emotions, thoughts and behaviours that women experience during labour.

23  
24 Women's psychological journey originated with telling other women from their  
25 social network that labour had started, while staying cocooned in a familiar  
26 environment. Most women focused on maintaining self-confidence at the start of labour  
27 and tended to withdraw into an inner world as labour became more intense. As birth  
28 progressed women experienced an altered state of consciousness including a change in  
29 time perception and intense feelings such as fear of dying. Women described various  
30 ways of coping with the pain and keeping control, which paradoxically, included  
31 releasing control to the midwife where appropriate. With the urge to push, women felt  
32 that once again they became alert and more active. Immediately after the baby was born,  
33 feelings of joy and pride were predominant. The journey through childbirth meant a  
34 growth in personal strength. Some women described themselves as a changed person in  
35 the sense that they felt stronger, empowered, and ready to meet the demands of the  
36 newborn.  
37  
38

### 39 **DISCUSSION**

40 Our study offers new insights into women's psychological experience of  
41 physiologic childbirth as a systematic synthesis on this topic has not been previously  
42 reported. We created a model of the emerging psychological pattern of this journey that  
43 is designated in terms of emotions and behaviours. Women described birth as a  
44 challenging but predominantly positive experience which they were able to overcome  
45 with their own coping resources and the help of others. For them, this resulted in  
46 feelings of strength to face a new episode in their life with their family. Our findings  
47 confirm our main hypothesis: there is a common psychological experience of  
48 physiological labour. As far as we are aware, this has not previously been reported  
49 using women's accounts as primary data. Our findings suggest that birth is just as much  
50 a psychological journey as a physical one.  
51  
52

53 Although the whole event does not seem to have been described before on the  
54 basis of qualitative evidence, elements of our findings are coherent with those from  
55  
56  
57

1  
2  
3  
4 other studies. The preference for familiarity of environment and people at the start of  
5 birth (35), the altered state of consciousness (36,37), the different time perception (38-  
6 40), the empowerment (6,41,42) and change (37,43) that come with childbirth have  
7 previously been described.

8 In our meta-synthesis, overall women expressed confidence in their capacity to  
9 give birth and to trust in themselves and in the process, despite some apprehension as  
10 labour began, and some concerns, including fear of death, during the most intensive  
11 stages of labour. Positive perceptions of their own coping strategies and confidence in  
12 their ability to go through birth were linked to women's positive experience of birth  
13 (44).

14 Women's psychological experience of physiological childbirth is strongly  
15 influenced by the people present at their birth. Women indicated that close relatives,  
16 mostly their partner and mother, as well as care providers were highly relevant for the  
17 way women experienced their birthing process. Women described the presence of their  
18 partner as the person with whom they most closely shared their experience and relied on  
19 for support, confirming that human birth is a social event (45). This is consistent with  
20 other studies that emphasized the decisive contribution partners can make to feelings of  
21 trust (46,47) and the woman's wish for a physiological birth (48).

22 Women indicated the midwife's presence as being critically important. At the  
23 beginning of the labour, women tended to want to be alone and at a distance from the  
24 midwife, but, as labour intensified, they wanted the midwife to be more visible and  
25 present while supporting the woman's control, or taking control if women wanted to  
26 hand it over. Control was a key feature in our study. Over the years various researchers  
27 identified different internal and external dimensions of control (49,50). Women's  
28 internal control includes a sense of self-control, such as thoughts, emotions, behaviours  
29 and coping with labour pain. External control is described as the woman's involvement  
30 in what is happening during birth, understanding what care providers are doing, and  
31 having an influence on the decisions. What seems important to women is not so much  
32 'having control', but rather the affective component of control, which is the 'feeling' of  
33 having influence (10), being able to have a say in what happens and having caregivers  
34 who are responsive to expressed wishes. Women's external control also seemed to arise  
35 from feeling that they were informed and could challenge decisions if the need arose  
36 (49).

37 Mixed feelings, both positive and negative were expressed regarding labour  
38 pain, and this is similar to several studies (51). Women experienced pain as meaningful  
39 in relation to their baby. They recognised its intensity but reframed it positively. This  
40 was also the case for other feelings that are usually interpreted negatively: (being  
41 exhausted, feeling overwhelmed and fear of dying) that were referred to in relation to  
42 specific moments of the labour and birth, but not in the global psychological evaluation  
43 of the experience once it was over. Pain and coping with pain also contributed to  
44 gaining strength to cope with the demands of parenthood. Berentson-Shaw et al. (2009)  
45 indicated that stronger self-efficacy during birth explains a lower level of pain (44).  
46 Rijnders et al. (2008) showed that women who felt unsatisfied about their coping with  
47 pain had more negative emotions about their birth (52).

1  
2  
3  
4 What this meta-synthesis demonstrates is the enormous importance of having  
5 maternity care providers, including midwives, at the birth that are compassionate and  
6 support women to keep a sense of control that is adjusted to their personal needs and  
7 wishes. Care providers can strengthen women's sense of coherence in offering them  
8 emotional support, stimulating trust and confidence, and supporting meaningful others  
9 to be there during the birthing process. Labouring women need to be able to create a  
10 trustful bond with the midwives and obstetricians attending them that offers reassurance  
11 and enables them to feel in control. It may be that women are more likely to experience  
12 a psychologically positive physiological birth when they feel that a supportive and  
13 compassionate companion or health care provider (in the case of the included studies, a  
14 midwife) is by their side, and is very sensitive and attentive to their cues. This includes  
15 effective responses when the woman needs them, and simple encouragement,  
16 information or support to reassure them that what is happening to them is normal. Such  
17 support may enable women to trust that they are safe to focus inwards, thus releasing  
18 the hormones and enabling the maternal behaviours that are essential to progress a  
19 physiological labour and birth. Midwives and other caregivers, including obstetricians,  
20 can facilitate this process by demonstrating empathy, compassion and supporting a  
21 woman's belief in her own ability to birth. These are key skills and competencies  
22 identified in midwifery-led care, recommended to be implemented worldwide (53).  
23 These affective skills should be included in midwifery, nursing and medical education  
24 so that all caregivers have the same expertise in the emotional care of women during  
25 birth.  
26  
27

28  
29 Most women in this synthesis indicated that, for them, birth was an enriching  
30 experience that gave them confidence in their own strength to face the challenges of  
31 motherhood. These emotions may be quite different when women are confronted with  
32 unexpected complications during childbirth, such as an emergency referral to obstetric  
33 care, an assisted vaginal birth, or an unplanned caesarian section, which tend to be  
34 associated with more negative emotions (54,55). Some women experience grief  
35 following a traumatic birth (which could include a birth without interventions,  
36 especially where women feel discounted, or actively abused). This grieving may well  
37 be the mourning over the loss of the experience which contributes to feelings of  
38 empowerment (56).  
39

40  
41 This study has several limitations. Close to half of the women in the sample had  
42 a home birth (39 of the 94 women). Women wishing a home birth seem to have less  
43 worries about health issues or fear of childbirth, and a greater desire for personal  
44 autonomy (57). Women planning a midwife-led birth also have lower rates of  
45 interventions which is also linked to positive experiences in birth (58).

46 The studies included in this meta-synthesis were from high income countries.  
47 The experiences of women in places with low-resourced maternity care systems may be  
48 different. Our sample was small and we lacked information on women's parity,  
49 preparation for birth, specific details of supporting professionals, partners and  
50 significant others which can be of major influence on women's experience of childbirth.

51 Further research is needed in women from different cultural backgrounds.  
52 Additionally, it is of great importance to gain insight into the psychological experience  
53 of birth in women with complications during pregnancy or childbirth. As childbirth is a  
54 neurobiological event directed by neurohormones produced both by the maternal and  
55  
56  
57

fetal brain (7), further research needs to address the interrelationship between neurohormones, psychological experience and physiological labour and birth (59,60).

Positive, physiological labour and birth can be a salutogenic event, from a mental health perspective, as well as in terms of physical wellbeing. The findings challenge the biomedical 'stages of labour' discourse and will help increase awareness of the importance of optimising physiological birth as far as possible, to enhance maternal mental health. The benefits of this process can be maximised through physical, emotional and social support for women, enhancing their belief in their ability to birth and not disturbing physiology unless it is necessary.

## CONCLUSIONS

Giving birth physiologically in the context of supportive, empathic caregivers, is a psychological journey that seems to generate a sense of empowerment in the transition to motherhood. The benefits of this process can be maximised through physical, emotional and social support for women, enhancing their belief in their ability to birth without disturbing physiology unless there is a compelling need. Health care professionals need to understand the empowering effects of the psychological experience of physiological childbirth. Further research to validate the results from this study is necessary.

## REFERENCES

- (1) Held V. Birth and death. *Ethics* 1989;99(2 (Jan)):362-388.
- (2) Simkin P. Just another day in a woman's life? Nature and consistency of women's long-term memories of their first birth experiences... part 2. *Birth* 1992;19(2):81-18p.
- (3) Aune I, Marit Torvik H, Selboe ST, Skogas AK, Persen J, Dahlberg U. Promoting a normal birth and a positive birth experience - Norwegian women's perspectives. *Midwifery* 2015 Jul;31(7):721-727.
- (4) Elmir R, Schmied V, Wilkes L, Jackson D. Women's perceptions and experiences of a traumatic birth: a meta-ethnography. *J Adv Nurs* 2010 Oct;66(10):2142-2153.
- (5) McKenzie-McHarg K, Ayers S, Ford E, Horsch A, Jomeen J, Sawyer A, et al. Post-traumatic stress disorder following childbirth: an update of current issues and recommendations for future research. *Journal of Reproductive and Infant Psychology* 2015 May 27;33(3):219-237.
- (6) Callister LC. Making meaning: women's birth narratives. *J Obstet Gynecol Neonatal Nurs* 2004;33(4):508-518.
- (7) Buckley SJ. Executive Summary of Hormonal Physiology of Childbearing: Evidence and Implications for Women, Babies, and Maternity Care. *J Perinat Educ* 2015;24(3):145-153.



- 1  
2  
3  
4 (8) Karlsdottir SI, Sveinsdottir H, Kristjansdottir H, Aspelund T, Olafsdottir OA.  
5 Predictors of women's positive childbirth pain experience: Findings from an Icelandic  
6 national study. *Women Birth* 2017 September 21.  
7
- 8 (9) Nieuwenhuijze M, Low LK. Facilitating women's choice in maternity care. *J Clin*  
9 *Ethics* 2013;24(3):276-282.  
10
- 11 (10) Meyer S. Control in childbirth: a concept analysis and synthesis. *J Adv Nurs* 2013  
12 Jan;69(1):218-228.  
13
- 14 (11) Beck CT. Birth trauma: in the eye of the beholder. *Nurs Res* 2004;53(1):28-35.  
15
- 16 (12) Thomson G, Downe S. Widening the trauma discourse: the link between childbirth  
17 and experiences of abuse. *J Psychosom Obstet Gynaecol* 2008 Dec;29(4):268-273.  
18
- 19 (13) Sadler M, Santos MJ, Ruiz-Berdun D, Rojas GL, Skoko E, Gillen P, et al. Moving  
20 beyond disrespect and abuse: addressing the structural dimensions of obstetric violence.  
21 *Reprod Health Matters* 2016 May;24(47):47-55.  
22
- 23 (14) Lukasse M, Schroll AM, Karro H, Schei B, Steingrimsdottir T, Van Parys AS, et  
24 al. Prevalence of experienced abuse in healthcare and associated obstetric characteristics  
25 in six European countries. *Acta Obstet Gynecol Scand* 2015 Jan 28.  
26
- 27 (15) World Health Organization. WHO recommendations: intrapartum care for a  
28 positive childbirth experience. WHO 2018.  
29
- 30 (16) Declercq E, Young R, Cabral H, Ecker J. Is a Rising Cesarean Delivery Rate  
31 Inevitable? Trends in Industrialized Countries, 1987 to 2007. *Birth* 2011;38(2):99-104.  
32
- 33 (17) Macfarlane AJ, Blondel B, Mohangoo AD, Cuttini M, Nijhuis J, Novak Z, et al.  
34 Wide differences in mode of delivery within Europe: risk-stratified analyses of  
35 aggregated routine data from the Euro-Peristat study. *BJOG* 2016 Mar;123(4):559-568.  
36
- 37 (18) Friedman E. The graphic analysis of labor. *Am J Obstet Gynecol* 1954  
38 Dec;68(6):1568-1575.  
39
- 40 (19) Dixon L, Skinner J, Foureur M. Women's perspectives of the stages and phases of  
41 labour. *Midwifery* 2013 Jan;29(1):10-17.  
42
- 43 (20) Halldorsdottir S, Karlsdottir SI. Journeying through labour and delivery:  
44 perceptions of women who have given birth. *Midwifery* 1996 Jun;12(2):48-61.  
45
- 46 (21) Reed R, Barnes M, Rowe J. Women's Experience of Birth: Childbirth as a Rite of  
47 Passage. *International Journal of Childbirth* 2016;6(1):46-56.  
48  
49  
50  
51  
52  
53  
54  
55  
56  
57  
58  
59  
60

- 1  
2  
3  
4 (22) Dixon L, Skinner J, Foureur M. The emotional journey of labour-women's  
5 perspectives of the experience of labour moving towards birth. *Midwifery* 2014  
6 Mar;30(3):371-377.  
7
- 8 (23) Barnett-Page E, Thomas J. Methods for the synthesis of qualitative research: a  
9 critical review. *BMC Med Res Methodol* 2009 Aug 11;9:59.  
10
- 11 (24) Carroll C. Qualitative evidence synthesis to improve implementation of clinical  
12 guidelines. *BMJ* 2017;356.  
13
- 14 (25) Noblit G, Hare R. *Meta-ethnography: synthesizing qualitative studies*. Newbury  
15 Park: SAGE; 1998.  
16
- 17 (26) Moher D, Liberati A, Tetzlaff J, Altman DG, PRISMA Group. Preferred reporting  
18 items for systematic reviews and meta-analyses: the PRISMA statement. *Int J Surg*  
19 2010;8(5):336-341.  
20
- 21 (27) Leahy-Warren P, Nieuwenhuijze M, Kazmierczak M, Benyamini Y, Murphy M,  
22 Crespo-Mirasol E, et al. The Psychological Experience of Physiological Childbirth: a  
23 Protocol for a Systematic Review of Qualitative Studies. *International Journal of*  
24 *Childbirth* 2017;7(2):101-109.  
25
- 26 (28) CASP. Critical Appraisal Skills Programme (CASP). (Qualitative checklist).  
27 Available at: <http://www.casp-uk.net/casp-tools-checklists>. Accessed OCTOBER, 2017.  
28
- 29 (29) Tong A, Sainsbury P, Craig J. Consolidated criteria for reporting qualitative  
30 research (COREQ): a 32-item checklist for interviews and focus groups. *Int J Qual*  
31 *Health Care* 2007 Dec;19(6):349-357.  
32
- 33 (30) France EF, Wells M, Lang H, Williams B. Why, when and how to update a meta-  
34 ethnography qualitative synthesis. *Syst Rev* 2016 Mar 15;5:44.  
35
- 36 (31) Sjoblom I, Nordstrom B, Edberg AK. A qualitative study of women's experiences  
37 of home birth in Sweden. *Midwifery* 2006 Dec;22(4):348-355.  
38
- 39 (32) Ng M, Sinclair M. Women's experience of planned home birth: a  
40 phenomenological study. *RCM Midwives* 2002;5(2):56-59.  
41
- 42 (33) Hall SM, Holloway IM. Staying in control: women's experiences of labour in  
43 water. *Midwifery* 1998 Mar;14(1):30-36.  
44
- 45 (34) Leap N, Sandall J, Buckland S, Huber U. Journey to confidence: women's  
46 experiences of pain in labour and relational continuity of care. *J Midwifery Womens*  
47 *Health* 2010;55(3):234-242.  
48  
49  
50  
51  
52  
53  
54  
55  
56  
57  
58  
59  
60

- 1  
2  
3  
4 (35) Carlsson I. Being in a safe and thus secure place, the core of early labour: A  
5 secondary analysis in a Swedish context. *International journal of qualitative studies on*  
6 *health and well-being* 2016;11(1):30230-8.  
7
- 8 (36) Machin D, Scamell M. The experience of labour: using ethnography to explore the  
9 irresistible nature of the bio-medical metaphor during labour. *Midwifery* 1997  
10 Jun;13(2):78-84.  
11
- 12 (37) Parratt J. The impact of childbirth experiences on women's sense of self: a review  
13 of the literature. *Aust J Midwifery* 2002;15(4):10-16.  
14
- 15 (38) Beck CT. Women's temporal experiences during the delivery process: a  
16 phenomenological study. *Int J Nurs Stud* 1994 Jun;31(3):245-252.  
17
- 18 (39) Simonds W. Watching the clock: keeping time during pregnancy, birth, and  
19 postpartum experiences. *Soc Sci Med* 2002 Aug;55(4):559-570.  
20
- 21 (40) Maher JM. Progressing through labour and delivery: Birth time and women's  
22 experiences. *Women's Studies International Forum* 2008;31(2):192-137.  
23
- 24 (41) Johnson TR, Callister LC, Freeborn DS, Beckstrand RL, Huender K. Dutch  
25 women's perceptions of childbirth in the Netherlands. *MCN Am J Matern Child Nurs*  
26 2007;32(3):170-177.  
27
- 28 (42) Lindgren H, Erlandsson K. Women's experiences of empowerment in a planned  
29 home birth: a Swedish population-based study. *Birth* 2010 Dec;37(4):309-317.  
30
- 31 (43) Lundgren I. Swedish women's experience of childbirth 2 years after birth.  
32 *Midwifery* 2005 Dec;21(4):346-354.  
33
- 34 (44) Berentson-Shaw J, Scott KM, Jose PE. Do self-efficacy beliefs predict the  
35 primiparous labour and birth experience? A longitudinal study. *Journal of Reproductive*  
36 *and Infant Psychology* 2009;27(4):357-373.  
37
- 38 (45) Rosenberg K, Trevathan W. Birth, obstetrics and human evolution. *BJOG* 2002  
39 Nov;109(11):1199-1206.  
40
- 41 (46) Lundgren I, Karlsdottir SI, Bondas T. Long-term memories and experiences of  
42 childbirth in a Nordic context—a secondary analysis. *International Journal of*  
43 *Qualitative Studies on Health and Well-being* 2009;4(2):115-128.  
44
- 45 (47) Howarth AM, Swain N, Treharne GJ. Taking personal responsibility for well-being  
46 increases birth satisfaction of first time mothers. *J Health Psychol* 2011;16(8):1221-  
47 1230.  
48  
49  
50  
51  
52  
53  
54  
55  
56  
57  
58  
59  
60

- 1  
2  
3  
4 (48) Kringeland T, Daltveit AK, Møller A. How Does Preference for Natural Childbirth  
5 Relate to the Actual Mode of Delivery? A Population-based Cohort Study from  
6 Norway. *Birth* 2010;37(1):21-27.  
7
- 8 (49) Green JM, Baston HA. Feeling in control during labor: concepts, correlates, and  
9 consequences. *Birth* 2003 Dec;30(4):235-247.  
10
- 11 (50) Ford E, Ayers S. Stressful events and support during birth: the effect on anxiety,  
12 mood and perceived control. *J Anxiety Disord* 2009 Mar;23(2):260-268.  
13
- 14 (51) Whitburn LY, Jones LE, Davey M, McDonald S. The nature of labour pain: An  
15 updated review of the literature. *Women and Birth* 2018 April 22,.  
16  
17
- 18 (52) Rijnders M, Baston H, Schonbeck Y, van der Pal K, Prins M, Green J, et al.  
19 Perinatal factors related to negative or positive recall of birth experience in women 3  
20 years postpartum in the Netherlands. *Birth* 2008 Jun;35(2):107-116.  
21
- 22 (53) Sandall J, Soltani H, Gates S, Shennan A, Devane D. Midwife-led continuity  
23 models versus other models of care for childbearing women. *Cochrane Database Syst*  
24 *Rev* 2016 Apr 28;4:CD004667.  
25  
26
- 27 (54) Handelzalts JE, Waldman Peyser A, Krissi H, Levy S, Wiznitzer A, Peled Y.  
28 Indications for Emergency Intervention, Mode of Delivery, and the Childbirth  
29 Experience. *PLoS One* 2017 Jan 3;12(1):e0169132.  
30
- 31 (55) Henriksen L, Grimsrud E, Schei B, Lukasse M, Bidens Study Group. Factors  
32 related to a negative birth experience - A mixed methods study. *Midwifery* 2017  
33 Aug;51:33-39.  
34  
35
- 36 (56) Bell AF, Andersson E. The birth experience and women's postnatal depression: A  
37 systematic review. *Midwifery* 2016 August 01;39:112-123.  
38
- 39 (57) van Haaren-Ten Haken T, Hendrix M, Nieuwenhuijze M, Bude L, de Vries R,  
40 Nijhuis J. Preferred place of birth: characteristics and motives of low-risk nulliparous  
41 women in the Netherlands. *Midwifery* 2012 Oct;28(5):609-618.  
42  
43
- 44 (58) Maassen MS, Hendrix MJ, Van Vugt HC, Veersema S, Smits F, Nijhuis JG.  
45 Operative deliveries in low-risk pregnancies in The Netherlands: primary versus  
46 secondary care. *Birth* 2008 December 01;35(4):277-282.  
47
- 48 (59) Dixon L, Skinner J, Foureur M. The emotional and hormonal pathways of labour  
49 and birth: integrating mind, body and behaviour. *New Zealand College of Midwives*  
50 *Journal* 2013;48(1):15-23.  
51  
52
- 53 (60) Olza-Fernandez I, Marin Gabriel MA, Gil-Sanchez A, Garcia-Segura LM, Arevalo  
54 MA. Neuroendocrinology of childbirth and mother-child attachment: the basis of an  
55  
56  
57  
58  
59

1  
2  
3  
4 etiopathogenic model of perinatal neurobiological disorders. Front Neuroendocrinol  
5 2014 Oct;35(4):459-472.  
6  
7  
8  
9  
10  
11  
12  
13  
14  
15  
16  
17  
18  
19

20 **Figure legends:**

21 Figure 1. Flow chart

22  
23 Table 1. Characteristics of selected studies

24  
25 Table 2. Themes, subthemes and studies contributing/thematic table and studies  
26 contributing to each finding

27  
28 Appendix 1. Search Terms

29  
30 Supplementary File: CASP and COREQ tables  
31  
32  
33  
34  
35  
36  
37  
38  
39  
40  
41  
42  
43  
44  
45  
46  
47  
48  
49  
50  
51  
52  
53  
54  
55  
56  
57  
58  
59  
60

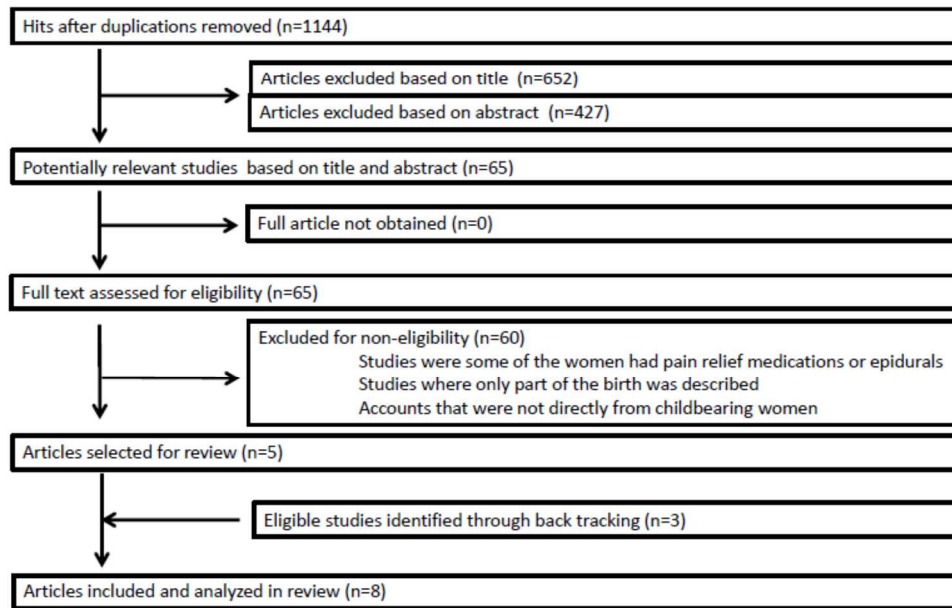

Figur 1. Flow Chart

1261x889mm (96 x 96 DPI)

|                                                                                                                                                                                       | AND |                                                                                                                                                                                                                                                                                                                       | AND |                                                                                                                                                           | AND |                                                                                                                                                                                                              | AND |                                                                                                                                                                                                                                                                       |
|---------------------------------------------------------------------------------------------------------------------------------------------------------------------------------------|-----|-----------------------------------------------------------------------------------------------------------------------------------------------------------------------------------------------------------------------------------------------------------------------------------------------------------------------|-----|-----------------------------------------------------------------------------------------------------------------------------------------------------------|-----|--------------------------------------------------------------------------------------------------------------------------------------------------------------------------------------------------------------|-----|-----------------------------------------------------------------------------------------------------------------------------------------------------------------------------------------------------------------------------------------------------------------------|
| woman                                                                                                                                                                                 |     | experience                                                                                                                                                                                                                                                                                                            |     | normal                                                                                                                                                    |     | childbirth                                                                                                                                                                                                   |     | qualitative design                                                                                                                                                                                                                                                    |
| <ul style="list-style-type: none"> <li>• wom* OR</li> <li>mother* OR</li> <li>maternal* OR</li> <li>primip* OR</li> <li>multip* OR</li> <li>paturient* OR</li> <li>female*</li> </ul> |     | <ul style="list-style-type: none"> <li>• experienc* OR</li> <li>percept* OR</li> <li>emotion* OR</li> <li>thought* OR</li> <li>feeling* OR</li> <li>view* OR</li> <li>opinion* OR</li> <li>recall* OR</li> <li>memor* OR</li> <li>satisfact* OR</li> <li>cognit* OR</li> <li>behavio* OR</li> <li>insight*</li> </ul> |     | <ul style="list-style-type: none"> <li>• normal OR</li> <li>natural* OR</li> <li>uncomplicat*</li> <li>OR undistrurb*</li> <li>OR physiologic*</li> </ul> |     | <ul style="list-style-type: none"> <li>• childbirth OR</li> <li>"child birth" OR</li> <li>child-birth OR</li> <li>birth* OR labour</li> <li>OR labor OR</li> <li>delivery OR</li> <li>intrapartum</li> </ul> |     | <ul style="list-style-type: none"> <li>• qualit* OR</li> <li>interview* OR</li> <li>narrat* OR</li> <li>synthes* OR</li> <li>"focus group*"</li> <li>OR ethnograph*</li> <li>OR "grounded</li> <li>theory" OR</li> <li>phenomenolog*</li> <li>OR discourse</li> </ul> |

or peer review only

## CASP ASSESSMENT.

| PAPER                                 | 1. Aims | 2. Methodology | 3. Research design | 4. Recruitment | 5. Data collection | 6. Researcher/participant | 7. Ethical issues | 8. Data analysis | 9. Findings | 10. Valuable |
|---------------------------------------|---------|----------------|--------------------|----------------|--------------------|---------------------------|-------------------|------------------|-------------|--------------|
| 1. Aune et al, 2015                   | YES     | YES            | YES                | YES            | YES                | YES                       | YES               | YES              | YES         | EXCELLENT    |
| 2. Dixon et al, 2014                  | YES     | YES            | YES                | YES            | YES                | YES                       | YES               | YES              | YES         | EXCELLENT    |
| 3. Hall SM & Holloway, 1998           | YES     | YES            | YES                | YES            | YES                | YES                       | YES               | YES              | YES         | GOOD         |
| 4. Halldorsdottir & Karlsdottir, 1996 | YES     | YES            | YES                | YES            | YES                | YES                       | YES               | YES              | YES         | EXCELLENT    |
| 5. Leap, 2010                         | YES     | YES            | YES                | YES            | YES                | YES                       | YES               | YES              | YES         | GOOD         |
| 6 Ng M & Sinclair M, 2002             | YES     | YES            | YES                | YES            | YES                | YES                       | YES               | YES              | YES         | GOOD         |
| 7. Reed et al, 2016                   | YES     | YES            | YES                | YES            | YES                | YES                       | YES               | YES              | YES         | EXCELLENT    |
| 8. Sjoblom et al, 2006                | YES     | YES            | YES                | YES            | YES                | YES                       | YES               | YES              | YES         | GOOD         |

CORE-Q TABLE Comprehensiveness of reporting assessment (consolidated criteria for reporting qualitative research checklist)

| 1 Aune et al, 2015 | 2 Dixon et al, 2014 | 3 Hall SM & Holloway IM, 1998 | 4 Halldorsdottir S & Karlsdottir SL, 1996 | 5 Leap et al, 2010 | 6 Ng M & Sinclair M, 2002 | 7 Reed et al, 2016 | 8 Sjoblom I et al, 2006 |
|--------------------|---------------------|-------------------------------|-------------------------------------------|--------------------|---------------------------|--------------------|-------------------------|
|--------------------|---------------------|-------------------------------|-------------------------------------------|--------------------|---------------------------|--------------------|-------------------------|

| Reporting criteria                                   | Studies reporting each criterion |
|------------------------------------------------------|----------------------------------|
| Characteristics of research team:                    |                                  |
| - Interviewer or facilitator identified              | 4, 5, 7, 8                       |
| - Credentials                                        | 1, 2, 3, 4, 5, 6, 7, 8           |
| - Occupation                                         | 1, 2, 3, 4, 5, 6, 7, 8           |
| - Sex                                                | 1, 2, 3, 4, 5, 6, 7, 8           |
| - Experience and training                            | 1, 2, 3, 4, 5, 6, 7, 8           |
| Relationship with participants:                      |                                  |
| - Relationship established before study started      | 7                                |
| - Participant knowledge of interviewer               | 5, 8                             |
| Methodological theory identified                     | 1, 2, 3, 4, 5, 6, 7, 8           |
| Participant selection:                               |                                  |
| - Sampling method (for example, snowball, purposive) | 1, 2, 3, 4, 5, 6, 7, 8           |
| - Method of approach                                 | 1, 2, 3, 4, 5, 6, 7, 8           |
| - Sample size                                        | 1, 2, 3, 4, 5, 6, 7, 8           |
| - Number or reasons for non-participation            | 8                                |
| Setting:                                             |                                  |
| - Setting of data collection                         | 1, 3, 4, 5, 6, 7, 8              |
| - Presence of non-participants                       | 3                                |
| - Description of sample                              | 1, 2, 3, 4, 5, 6, 7, 8           |
| Data collection:                                     |                                  |
| - Interview guide                                    | 1, 2, 6, 8                       |
| - Repeat interviews                                  | --                               |
| - Audio or visual recording                          | 1, 2, 3, 4, 5, 6, 7, 8           |
| - Field notes                                        | 4, 5, 7, 8                       |
| - Duration                                           | 1, 5, 7, 8                       |
| - Data saturation                                    | 1, 2, 3, 6, 7, 8                 |
| - Transcripts returned to participants               | 2, 4, 7                          |
| Data analysis:                                       |                                  |
| - Number of data coders                              | 2, 3, 4, 5, 6, 7, 8              |
| - Description of coding tree                         | 1, 2, 3, 4, 5, 6, 7, 8           |
| - Derivation of themes                               | 1, 2, 3, 4, 5, 6, 7, 8           |
| - Use of software                                    | 7                                |
| - Participants' feedback or member checking          | 2, 4, 7                          |
| Reporting:                                           |                                  |
| - Participant quotations provided                    | 1, 2, 3, 4, 5, 6, 7, 8           |
| - Data and findings consistent                       | 1, 2, 3, 4, 5, 6, 7, 8           |
| - Clarity of major themes                            | 1, 2, 3, 4, 5, 6, 7, 8           |
| - Clarity of minor themes                            | 1, 2, 3, 4, 5, 6, 7, 8           |





# PRISMA 2009 Checklist

| Section/topic                      | #  | Checklist item                                                                                                                                                                                                                                                                                              | Reported on page # |
|------------------------------------|----|-------------------------------------------------------------------------------------------------------------------------------------------------------------------------------------------------------------------------------------------------------------------------------------------------------------|--------------------|
| <b>TITLE</b>                       |    |                                                                                                                                                                                                                                                                                                             |                    |
| Title                              | 1  | Identify the report as a systematic review, meta-analysis, or both.                                                                                                                                                                                                                                         | 1                  |
| <b>ABSTRACT</b>                    |    |                                                                                                                                                                                                                                                                                                             |                    |
| Structured summary                 | 2  | Provide a structured summary including, as applicable: background; objectives; data sources; study eligibility criteria, participants, and interventions; study appraisal and synthesis methods; results; limitations; conclusions and implications of key findings; systematic review registration number. | 4                  |
| <b>INTRODUCTION</b>                |    |                                                                                                                                                                                                                                                                                                             |                    |
| Rationale                          | 3  | Describe the rationale for the review in the context of what is already known.                                                                                                                                                                                                                              | 5                  |
| Objectives                         | 4  | Provide an explicit statement of questions being addressed with reference to participants, interventions, comparisons, outcomes, and study design (PICOS).                                                                                                                                                  | 5                  |
| <b>METHODS</b>                     |    |                                                                                                                                                                                                                                                                                                             |                    |
| Protocol and registration          | 5  | Indicate if a review protocol exists, if and where it can be accessed (e.g., Web address), and, if available, provide registration information including registration number.                                                                                                                               | 6                  |
| Eligibility criteria               | 6  | Specify study characteristics (e.g., PICOS, length of follow-up) and report characteristics (e.g., years considered, language, publication status) used as criteria for eligibility, giving rationale.                                                                                                      | 22                 |
| Information sources                | 7  | Describe all information sources (e.g., databases with dates of coverage, contact with study authors to identify additional studies) in the search and date last searched.                                                                                                                                  | 7                  |
| Search                             | 8  | Present full electronic search strategy for at least one database, including any limits used, such that it could be repeated.                                                                                                                                                                               | 21, 25             |
| Study selection                    | 9  | State the process for selecting studies (i.e., screening, eligibility, included in systematic review, and, if applicable, included in the meta-analysis).                                                                                                                                                   | 7                  |
| Data collection process            | 10 | Describe method of data extraction from reports (e.g., piloted forms, independently, in duplicate) and any processes for obtaining and confirming data from investigators.                                                                                                                                  | 7                  |
| Data items                         | 11 | List and define all variables for which data were sought (e.g., PICOS, funding sources) and any assumptions and simplifications made.                                                                                                                                                                       | 7                  |
| Risk of bias in individual studies | 12 | Describe methods used for assessing risk of bias of individual studies (including specification of whether this was done at the study or outcome level), and how this information is to be used in any data synthesis.                                                                                      | 7                  |
| Summary measures                   | 13 | State the principal summary measures (e.g., risk ratio, difference in means).                                                                                                                                                                                                                               | -                  |
| Synthesis of results               | 14 | Describe the methods of handling data and combining results of studies, if done, including measures of consistency (e.g., $I^2$ ) for each meta-analysis.                                                                                                                                                   | 7                  |

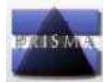

# PRISMA 2009 Checklist

| Section/topic                 | #  | Checklist item                                                                                                                                                                                           | Reported on page # |
|-------------------------------|----|----------------------------------------------------------------------------------------------------------------------------------------------------------------------------------------------------------|--------------------|
| Risk of bias across studies   | 15 | Specify any assessment of risk of bias that may affect the cumulative evidence (e.g., publication bias, selective reporting within studies).                                                             | -                  |
| Additional analyses           | 16 | Describe methods of additional analyses (e.g., sensitivity or subgroup analyses, meta-regression), if done, indicating which were pre-specified.                                                         | 7                  |
| <b>RESULTS</b>                |    |                                                                                                                                                                                                          |                    |
| Study selection               | 17 | Give numbers of studies screened, assessed for eligibility, and included in the review, with reasons for exclusions at each stage, ideally with a flow diagram.                                          | 22                 |
| Study characteristics         | 18 | For each study, present characteristics for which data were extracted (e.g., study size, PICOS, follow-up period) and provide the citations.                                                             | 23                 |
| Risk of bias within studies   | 19 | Present data on risk of bias of each study and, if available, any outcome level assessment (see item 12).                                                                                                | -                  |
| Results of individual studies | 20 | For all outcomes considered (benefits or harms), present, for each study: (a) simple summary data for each intervention group (b) effect estimates and confidence intervals, ideally with a forest plot. | -                  |
| Synthesis of results          | 21 | Present results of each meta-analysis done, including confidence intervals and measures of consistency.                                                                                                  | 8                  |
| Risk of bias across studies   | 22 | Present results of any assessment of risk of bias across studies (see Item 15).                                                                                                                          | -                  |
| Additional analysis           | 23 | Give results of additional analyses, if done (e.g., sensitivity or subgroup analyses, meta-regression [see Item 16]).                                                                                    | -                  |
| <b>DISCUSSION</b>             |    |                                                                                                                                                                                                          |                    |
| Summary of evidence           | 24 | Summarize the main findings including the strength of evidence for each main outcome; consider their relevance to key groups (e.g., healthcare providers, users, and policy makers).                     | 24                 |
| Limitations                   | 25 | Discuss limitations at study and outcome level (e.g., risk of bias), and at review-level (e.g., incomplete retrieval of identified research, reporting bias).                                            | 13                 |
| Conclusions                   | 26 | Provide a general interpretation of the results in the context of other evidence, and implications for future research.                                                                                  | 13                 |
| <b>FUNDING</b>                |    |                                                                                                                                                                                                          |                    |
| Funding                       | 27 | Describe sources of funding for the systematic review and other support (e.g., supply of data); role of funders for the systematic review.                                                               | 7                  |

From: Moher D, Liberati A, Tetzlaff J, Altman DG, The PRISMA Group (2009). Preferred Reporting Items for Systematic Reviews and Meta-Analyses: The PRISMA Statement. PLoS Med 6(7): e1000097. doi:10.1371/journal.pmed1000097

For more information, visit: [www.prisma-statement.org](http://www.prisma-statement.org).

# BMJ Open

## WOMEN 'S PSYCHOLOGICAL EXPERIENCES OF PHYSIOLOGICAL CHILDBIRTH: A META-SYNTHESIS

|                                                                                                                                                                                     |                                                                                                                                                                                                                                                                                                                                                                                                                                                                                                                                                                                                                                                                                                                                                                                                                                                                                                                                                                                                                                                                                                              |
|-------------------------------------------------------------------------------------------------------------------------------------------------------------------------------------|--------------------------------------------------------------------------------------------------------------------------------------------------------------------------------------------------------------------------------------------------------------------------------------------------------------------------------------------------------------------------------------------------------------------------------------------------------------------------------------------------------------------------------------------------------------------------------------------------------------------------------------------------------------------------------------------------------------------------------------------------------------------------------------------------------------------------------------------------------------------------------------------------------------------------------------------------------------------------------------------------------------------------------------------------------------------------------------------------------------|
| Journal:                                                                                                                                                                            | <i>BMJ Open</i>                                                                                                                                                                                                                                                                                                                                                                                                                                                                                                                                                                                                                                                                                                                                                                                                                                                                                                                                                                                                                                                                                              |
| Manuscript ID                                                                                                                                                                       | bmjopen-2017-020347.R2                                                                                                                                                                                                                                                                                                                                                                                                                                                                                                                                                                                                                                                                                                                                                                                                                                                                                                                                                                                                                                                                                       |
| Article Type:                                                                                                                                                                       | Research                                                                                                                                                                                                                                                                                                                                                                                                                                                                                                                                                                                                                                                                                                                                                                                                                                                                                                                                                                                                                                                                                                     |
| Date Submitted by the Author:                                                                                                                                                       | 15-Aug-2018                                                                                                                                                                                                                                                                                                                                                                                                                                                                                                                                                                                                                                                                                                                                                                                                                                                                                                                                                                                                                                                                                                  |
| Complete List of Authors:                                                                                                                                                           | Olza, Ibone; Universidad de Alcala de Henares Facultad de Medicina y Ciencias de la Salud, Medicina y Especialidades Médicas<br>Leahy-Warren, Patricia; Catherine McAuley School of Nursing and Midwifery, University College Cork, , Nursing and Midwifery<br>Benyamini, Yael; Tel Aviv University<br>Kazmierczak, Maria; Uniwersytet Gdanski, Institute of Psychology<br>Karlsdottir, Sigfridur Inga; University of Akureyri, Iceland, Health Sciences<br>Spyridou, Andria; Universitat Konstanz Fachbereich Psychologie<br>Crespo-Mirasol, Esther; University of Barcelona, Hospital Clinic<br>Takacs, Lea; Charles University, Department of Psychology<br>Hall, Priscilla J.; Emory University. Nell Hodgson Woodruff School of Nursing.<br>Murphy, Margaret; University College Cork National University of Ireland, Nursing and Midwifery<br>Jonsdottir, Sigridur Sia; Haskolinn a Akureyri, Health Sciences<br>Downe, Soo; University of Central Lancashire, research in childbirth and health<br>Nieuwenhuijze, Marianne; Zuyderland Medisch Centrum Heerlen, Research Centre for Midwifery Science |
| <b>Primary Subject Heading</b>:                                                                                                                                                     | Obstetrics and gynaecology                                                                                                                                                                                                                                                                                                                                                                                                                                                                                                                                                                                                                                                                                                                                                                                                                                                                                                                                                                                                                                                                                   |
| Secondary Subject Heading:                                                                                                                                                          | Qualitative research                                                                                                                                                                                                                                                                                                                                                                                                                                                                                                                                                                                                                                                                                                                                                                                                                                                                                                                                                                                                                                                                                         |
| Keywords:                                                                                                                                                                           | Childbirth, Physiological Childbirth, Lived experiences, Psychological, empowerment, OBSTETRICS                                                                                                                                                                                                                                                                                                                                                                                                                                                                                                                                                                                                                                                                                                                                                                                                                                                                                                                                                                                                              |
| <p>Note: The following files were submitted by the author for peer review, but cannot be converted to PDF. You must view these files (e.g. movies) online.</p> <p>flowchart.jpg</p> |                                                                                                                                                                                                                                                                                                                                                                                                                                                                                                                                                                                                                                                                                                                                                                                                                                                                                                                                                                                                                                                                                                              |

# Women's psychological experiences of physiological childbirth: a meta-synthesis.

## Authors:

**Corresponding author: Olza, Ibone.** MD, PhD, D. Psychiatrist. Associate Professor at Universidad de Alcala de Henares, Faculty of Medicine. Campus Universitario - C/ 19, Av. de Madrid, Km 33,600. Madrid, ES 28871.

ORCID #: [0000-0002-9614-9496](https://orcid.org/0000-0002-9614-9496) Email: [ibone.olza@uah.es](mailto:ibone.olza@uah.es)

2. **Leahy-Warren, Patricia.** Principal Investigator Nursing and Midwifery. Senior Lecturer. Nursing & Midwifery University College Cork, Ireland.  
Researcher ID: D-5415-2014. Email: [Patricia.Leahy@ucc.ie](mailto:Patricia.Leahy@ucc.ie)

3. **Benyamini, Yael.** PhD. Professor. Bob Shapell School of Social Work. Tel Aviv University. Tel Aviv 69978 ISRAEL.  
ORCID # 0000-0001-5110-8212 Email: [benyael@post.tau.ac.il](mailto:benyael@post.tau.ac.il)

4- **Kazmierczak, Maria.** Ph.D. Associate Professor in Psychology. Institute of Psychology. University of Gdansk Gdansk, Poland.  
Email: [psymk@ug.edu.pl](mailto:psymk@ug.edu.pl)

5. **Karlsdottir, Sigfridur Inga.** Ph.D. Associate professor School of Health Sciences. University of Akureyri, Iceland  
ORCID #:0000-0001-5886-9196 Email: [inga@unak.is](mailto:inga@unak.is)

6. **Spyridou, Andria.** Ph.D. University of Konstanz, Department of Psychology, Scientific Collaborator. Konstanz, Baden-Württemberg, DE  
ORCID #: [orcid.org/0000-0002-2415-6240](https://orcid.org/0000-0002-2415-6240) Email: [andria.spyridou@uni-konstanz.de](mailto:andria.spyridou@uni-konstanz.de)

7. **Crespo-Mirasol, Esther.** Ph.D. Universitat Barcelona, Hospital Clinic, Midwifery, Barcelona, Catalunya, ES.  
Email: [ecrespo@clinic.ub.es](mailto:ecrespo@clinic.ub.es)

8. **Takács, Lea.** M.A., Ph.D. Lecturer, Researcher Faculty of Arts, Charles University, Department of Psychology. Prague, Czech Republic.  
Email: [lea.takacs@ff.cuni.cz](mailto:lea.takacs@ff.cuni.cz)

9. **Hall, Priscilla J.** PhD CNM. Emory University. Nell Hodgson Woodruff School of Nursing. USA.  
Email: [pjhall@emory.edu](mailto:pjhall@emory.edu)

10. **Murphy, Margaret.** University College Cork National University of Ireland, Nursing and Midwifery Cork, IE  
ORCID ID: [orcid.org/0000-0001-9979-9462](https://orcid.org/0000-0001-9979-9462) Email: [mgt.murphy@ucc.ie](mailto:mgt.murphy@ucc.ie)

1  
2  
3  
4 11. **Jonsdottir, Sigridur Sia**. Assistant professor. School of Health Science, University  
5 of Akureyri, Akureyri, Iceland  
6 ORCID ID: 0000-0002-5152-3173 Email: [siaj@unak.is](mailto:siaj@unak.is)  
7

8 12. **Downe, Soo**. Ph.D. Professor of Midwifery Studies. University of Central  
9 Lancashire. UK.  
10 ORCID ID: 0000-0003-2848-2550 Email: [sdowne@uclan.ac.uk](mailto:sdowne@uclan.ac.uk)  
11

12 13. **Nieuwenhuijze, Marianne J**. PhD. Professor of Midwifery. Research Centre for  
13 Midwifery Science Maastricht, Zuyd University, The Netherlands.  
14 Email: [m.nieuwenhuijze@av-m.nl](mailto:m.nieuwenhuijze@av-m.nl)  
15

16  
17 **Source of support:** EU COST ACTION IS 1405 BIRTH: BUILDING  
18 INTRAPARTUM RESEARCH THROUGH HEALTH  
19 ([http://www.cost.eu/COST\\_Actions/isch/IS1405](http://www.cost.eu/COST_Actions/isch/IS1405))  
20

21 **Word count:** 5.502 words  
22

23 **Numbers of figures and tables:**

24  
25 Figure 1. Flow chart  
26

27 Table 1: Characteristics of selected studies  
28

29 Table 2: Themes, subthemes and studies contributing/thematic table and studies  
30 contributing to each finding.  
31

32 Appendix 1: Search Terms  
33

34 Supplementary File: CASP and COREQ tables  
35  
36  
37  
38  
39  
40  
41

42 **Abstract**

43  
44 **Objective:** To synthesize qualitative studies on women's psychological experiences of  
45 physiological childbirth  
46

47 **Design:** Meta-synthesis  
48

49 **Methods:** Studies exploring women's psychological experiences of physiological birth  
50 using qualitative methods were eligible. The research group searched the following  
51 databases: MEDLINE, CINAHL, PsycINFO, PsycARTICLES, SocINDEX and  
52 Psychology and Behavioural Sciences Collection. Key authors were contacted, and we  
53 searched reference lists of collected articles. Quality assessment was done  
54 independently using the Critical Appraisal Skills Programme (CASP) checklist. Studies  
55 were synthesized using techniques of meta-ethnography.  
56  
57  
58  
59  
60

1  
2  
3  
4 **Results:** Eight studies involving 94 women were included. Three third order  
5 interpretations were identified: ‘maintaining self confidence in early labour’,  
6 ‘withdrawing within as labour intensifies’ and ‘the uniqueness of the birth experience’.  
7 Using the first, second and third order interpretations, a line of argument developed that  
8 demonstrated ‘the empowering journey of giving birth’ encompassing the various  
9 emotions, thoughts and behaviours that women experience during birth.  
10

11 **Conclusion:** Giving birth physiologically is an intense and transformative psychological  
12 experience that generates a sense of empowerment. The benefits of this process can be  
13 maximised through physical, emotional and social support for women, enhancing their  
14 belief in their ability to birth and not disturbing physiology unless it is necessary. Health  
15 care professionals need to take cognisance of the empowering effects of the  
16 psychological experience of physiological childbirth. Further research to validate the  
17 results from this study is necessary.  
18

### 19 **Strengths and limitations**

- 20 • Research protocol was registered (PROSPERO Registration CRD42016037072)  
21 and published.
- 22 • Strict inclusion criteria were applied so that only studies where all women had  
23 unmedicated births were included.
- 24 • Some births had occurred more than 10 years before. Parity was not  
25 differentiated as a criteria.
- 26 • All selected studies came from high income countries.
- 27 • All births were attended by midwives and a relatively large number of women  
28 included in this study had a home birth.  
29  
30  
31  
32  
33  
34

35 **KEYWORDS:** Physiological Childbirth, Psychology, Lived experience,  
36 Empowerment  
37  
38  
39  
40  
41  
42

### 43 **Introduction**

44  
45 Childbirth is a profound psychological experience that has a physical,  
46 psychological, social and existential impact in both the short and longer term (1). It  
47 leaves lifelong vivid memories for women (2). The effects of a birth experience can be  
48 positive and empowering, or negative and traumatizing (3-5). Regardless of their  
49 cultural background, women need to share their birth stories to integrate fully an  
50 experience that is both physically and emotionally intense (6).  
51

52 Neurobiologically, childbirth is directed by hormones produced both by the  
53 maternal and the fetal brain (7). During childbirth and immediately after delivery both  
54 brains are immersed in a very specific neurohormonal scenario, impossible to reproduce  
55 artificially. The psychology of childbirth is likely to be mediated by these neuro  
56  
57  
58  
59

1  
2  
3  
4 hormones, as well as by particular cultural and personal issues. The peaks of  
5 endogenous oxytocin during labour, together with the progressive release of endorphins  
6 in the maternal brain, are likely to cause the altered state of consciousness most typical  
7 of unmedicated labour that midwives and mothers easily recognise or describe as  
8 “labour land” but that has received little attention from neuropsychology.  
9

10 Midwives and obstetricians require a deep understanding of the emotional  
11 aspects of childbirth in order to meet the emotional and psychosocial needs of labouring  
12 women. Factors that facilitate a positive birth experience include having a sense of  
13 control during birth, an opportunity for active involvement in care, and support and  
14 responsive care from others in relation to women’s experience of labour pain (8-10).  
15 There is limited research on women’s lived experience of physiological childbirth,  
16 including their emotional response (11-13). This lack of knowledge concerning the  
17 psychological dimension of childbirth can lead to mismanagement of the birthing  
18 process. At the extreme, a lack of understanding of the psychology of childbirth can  
19 contribute to a traumatizing birth, which can be devastating to women even when the  
20 immediate outcome is a physically healthy mother and newborn (14). When women in  
21 labour encounter caregivers who do not incorporate emotional needs into their care,  
22 women can experience this as disrespect, mistreatment or in some instances, as a form  
23 of abuse (15) or obstetric violence (16). The problem of disrespect towards women in  
24 labour is a growing concern globally, as is also the over application of medicalized care  
25 practices for healthy women (17-19). Rates for these interventions vary greatly between  
26 and within countries. For example, using 2010 Euro-Peristat data, Macfarlane et al  
27 (2016) reported on a range in spontaneous vaginal birth from 45.3%-78.5% (20).  
28  
29

30 The medical model has traditionally divided labour into stages according to  
31 mechanical or physical changes such as dilation of the cervix and descent of the head as  
32 depicted on the traditional Friedman’s curve or WHO partograph (21). However, the  
33 subjective, emotional experience of labour does not conform to these mechanical  
34 descriptions of the body’s changes. It is questionable that women experience specific  
35 stages or phases as traditionally described by professionals (22). Understanding the  
36 psychological experience in physiological childbirth can contribute to enhancing a  
37 salutogenic (‘wellbeing’) approach to health, can contribute to the promotion of  
38 healthy, happy family relationships in the longer run  
39  
40

41 The aim of this meta-synthesis is to locate and synthesise published qualitative  
42 studies that describe the psychological process of women during physiological  
43 childbirth, paying attention to the immanent psychological responses that emerge during  
44 the process of labour and birth. We hypothesised that there is a common psychological  
45 experience of physiological labour. We focus on laboring women’s thoughts and  
46 feelings, and the meanings they ascribe to their perceptions of childbirth process and the  
47 surrounding environment, as reaction to both childbirth and to the surrounding  
48 environment are part of a single psychological process. We refer to the psychological  
49 process we are interested in by the Husserlian term “lived experience”, adopting a  
50 phenomenological theoretical lens for the analysis of the data in the included studies.  
51  
52  
53

## 54 **Methods**

55  
56  
57  
58  
59  
60

## Design

We undertook a meta-synthesis. This is a process of reviewing and consolidating qualitative research, to create a summary of qualitative findings and allow for the development of new interpretations (Thomas & Harden, 2008). Qualitative synthesis of a number of qualitative studies provides robust evidence to inform health care practices. Meta-ethnography was deemed to most appropriate qualitative synthesis approach for this analysis in order to transcend the findings of individual study accounts in developing a conceptual model (23). This synthesis method has the potential to provide a higher level of analysis and generate new conceptual understandings (24). The research approach used for this meta-synthesis was the seven-step process described by Noblit and Hare (25,26), which uses meta-ethnographic techniques like reciprocal and refutational techniques as well as line of argument synthesis. The research group used the Preferred Reporting Items for Systematic Reviews and Meta-Analyses (PRISMA) statements to inform the meta-synthesis (27). The research protocol was registered and published in the International Prospective Register of Systematic Reviews (PROSPERO) (Registration CRD42016037072) (28). Ethical approval was not required for this meta-synthesis.

**Patients and public were not involved in the design, conception or conduct of this study.**

## Data sources

A systematic search was conducted in March 2016 and updated in October 2017. The following databases were included: EBSCOhost, including the database MEDLINE, CINAHL, PsycINFO, PsycARTICLES, SocINDEX and Psychology and Behavioural Sciences Collection. The search terms are given in appendix 1. (We used EBSCOHOST for the complete search and therefore did not use MeSH terms). Eligible papers were written in English, Spanish and Portuguese. Five groups of two authors independently read the abstracts and selected articles, and the decision to include an article was achieved by consensus. When there was disagreement, a third author provided assistance and input. The research team searched reference lists of the included articles to identify additional articles that were relevant to the study question. We sought suggestions from experts in the field and articles from other sources.

## Eligibility criteria for selecting studies

For the purpose of our study, physiological childbirth was defined as an uninterrupted process without major interventions, such as induction, augmentation, instrumental assistance, caesarean section as well as use of epidural anaesthesia or other pain relief medications. The inclusion criteria were: (1) original research of (2) women who had physiological childbirth and (3) described their experiences and behaviours during (4) the whole process of childbirth. Studies were excluded, if the experience of childbirth was (1) described by any source other than the woman who experienced the birth (e.g. from health care professionals), (2) described only a single stage in the birth process or (3) described births with major medical and surgical interventions or pain management, e.g. caesarean section.

## Data extraction and synthesis



1  
2  
3  
4 Data analysis included the following steps. The first order interpretation  
5 involved reading and re-reading all studies to become familiar with their content,  
6 feeling and tone. The first author (IO) conducted a line by line coding of the findings of  
7 all included studies. Quotes, interpretations and explanations in the original studies were  
8 treated as data. The coding categories included: feelings, behaviours (actions), signs  
9 (e.g. pain, contractions), relations (midwife, partner, baby, and relatives), time  
10 perception, cognitions (thoughts and knowledge), location (home, water, places,  
11 transferring). Based on the emerging data, these coding categories were sorted into (1)  
12 early labour, (2) intense labour, (3) pushing, (4) baby out (immediately), (5) placenta  
13 and (6) evaluation of the whole birth experience.

14  
15 To achieve the second and third order interpretation, the collaborative authors  
16 reflected on the first order interpretations to identify the themes and subthemes that  
17 describe the emerging constructs grounded in the primary studies. This process included  
18 reciprocal (similarity) and refutational (contradictory) analysis which identified  
19 differences, divergences, and dissonance between the studies and then to synthesise  
20 these translations. Following this reflection process, the research team used a line of  
21 argument to create a model that best explains the psychological process of physiological  
22 childbirth, as described in the included studies.

### 23 **Quality assessment**

24 To ensure the quality of the findings in the study, all selected papers were  
25 screened on the methodological quality using CASP (29) and subsequently, all the  
26 included papers were assessed using COREQ (30) to ensure they had reported all the  
27 relevant details of their methodological and analytic approach.  
28  
29

### 30 *Reflexivity*

31  
32 Throughout the research process, the authors identified and explored their own  
33 views and opinions as possible influences on the decisions taken. This was done  
34 because of the subjective nature of qualitative research to protect the methodological  
35 rigor of the study. All of the authors of this paper are part of an EU-funded COST  
36 Action specifically examining aspects of physiological birth. The research  
37 group/authors have chosen to participate in the COST Action because of strong beliefs  
38 in the importance of understanding physiological and psychological processes of  
39 childbirth, to enhance the capacity of women to labour and give birth normally where  
40 this was possible for them, and where it is their choice to do so. All the authors believe  
41 that birth is a profound physiological, psychological, and socio-cultural experience for  
42 most women and babies.  
43

44 The research team included authors of multidisciplinary backgrounds. The  
45 contribution of each author, coming from different paradigms and perspectives on  
46 women's needs in labour ensured the interpretation of findings was grounded in the data  
47 and came from the data. The use of refutational analyses, as recommended by Noblit &  
48 Hare (20, 21) minimizes the risk of overlooking information because it did not fit with  
49 the authors pre-conceptions. This strengthens the trustworthiness of this research.  
50  
51

## 52 **Results**

### 53 **Included studies**

54  
55  
56  
57  
58  
59  
60

1  
2  
3  
4  
5 The search identified 1520 articles in EBSCOhost. There were 376 duplicates,  
6 which were removed, leaving 1144 unique articles in the sample. Figure 1 demonstrates  
7 the selection process, which resulted in eight included studies. All of the selected  
8 studies met the quality screening and assessment criteria. Some very relevant papers had  
9 to be excluded because just one or a few participants did not have a physiological birth  
10 as defined for this study. CASP and COREQ assessments are detailed in the  
11 supplementary files.

12 The eight included studies involved 94 women, 28 primiparous and 22  
13 multiparous women, although four studies did not identify parity in their sample. Of  
14 these, two studies had a mix of primiparous and multiparous women (half each) (17, 27)  
15 and two studies did not address parity for the sample at all (28, 29). Most of the  
16 interviews took place within a year after birth, but some studies had longer intervals,  
17 and in two studies, women were interviewed up to 10 or 20 years after birth (11,31).  
18 One study did not identify a time interval between the index birth and the interview  
19 (32). Thirty-nine of the women gave birth at home, four in a primary care unit and 51 in  
20 hospital. It seems that midwives were the primary carers of these women. Further  
21 characteristics of the studies can be found in Table 1.  
22  
23  
24  
25  
26  
27  
28  
29  
30  
31  
32  
33  
34  
35  
36  
37  
38  
39  
40  
41  
42  
43  
44  
45  
46  
47  
48  
49  
50  
51  
52  
53  
54  
55  
56  
57  
58  
59  
60

TABLE 1. Characteristics of selected studies

| AUTHOR(S) / YEAR                         | TITLE                                                                                                 | COUNTRY     | METHODOLOGY                                              | N PARITY               | TIME AFTER BIRTH    | BIRTH SETTING                                                             | OBJECTIVE                                                                        |
|------------------------------------------|-------------------------------------------------------------------------------------------------------|-------------|----------------------------------------------------------|------------------------|---------------------|---------------------------------------------------------------------------|----------------------------------------------------------------------------------|
| 1. Aune et al. 2015(3)                   | Promoting a normal birth and a positive birth experience – Norwegian women's perspectives             | Norway      | Qualitative, focused on salutogenic principles           | 12 prim                | 5 -6 weeks          | Hospital birth unit.                                                      | To understand factors important for a normal birth and positive birth experience |
| 2. Dixon et al. 2014(13)                 | The emotional journey of labour-women's perspectives of the experience of labour moving towards birth | New Zealand | Critical feminist standpoint methodology                 | 6 prim<br>12 multi     | 6 months            | Midwifery continuity care: 7 homebirths, 4 primary care, 7 tertiary care. | To explore women's experiences of birth                                          |
| 3. Hall & Holloway 1998 (33)             | Staying in control: Women's experiences of labour in water                                            | UK          | Grounded theory, using the constant comparative method'. | 9<br>(no parity given) | 48 hours            | Hospital (water birth)                                                    | To examine women's attempt at control during labour in the water                 |
| 4. Halldorsdottir & Karlsdottir 1996(11) | Journeying through labour and delivery: Perceptions of women who have given birth                     | Iceland     | Phenomenological perspective                             | 14<br>(mix of parity)  | 2 months to 20 yrs. | Hospital                                                                  | To explore experience of giving birth                                            |
| 5. Leap et al. 2010(34)                  | Journey to confidence: Women's experiences of pain in labour and relational continuity of care        | UK          | Qualitative, descriptive, thematic analysis              | 5 prim<br>5 multi      | 4 weeks             | Albany midwifery practice, home and hospital                              | To explore women's view of continuity of care and pain in labour                 |
| 6. Ng & Sinclair 2002(32)                | Women's experience of planned home birth: A phenomenological study                                    | UK          | Phenomenological perspective                             | 9<br>(no parity given) | Not mentioned       | Homebirths                                                                | To explore women's lived experiences of planned homebirth                        |
| 7. Reed, Barnes & Rowe 2016(12)          | Women's experience of birth: Childbirth as a rite of passage                                          | Australia   | Narrative approach, rites of passage theory.             | 5 prim<br>5 multi      | 6 months            | 6 hospital births, 4 homebirths                                           | To explore women's experiences of physiological childbirth                       |
| 8. Sjöblom et al. 2006(31)               | A qualitative study of women's experiences of home birth in Sweden                                    | Sweden      | Phenomenological–hermeneutic method.                     | 12<br>(mix of parity)  | Less than 10 years  | Homebirths                                                                | To illuminate the experience of giving birth at home                             |

1  
2  
3  
4  
5  
6  
7  
8  
9  
10  
11  
12  
13  
14  
15  
16  
17  
18  
19  
20  
21  
22  
23  
24  
25  
26  
27  
28  
29  
30  
31  
32  
33  
34  
35  
36  
37  
38  
39  
40  
41  
42  
43  
44  
45  
46  
47  
48  
49  
50  
51  
52  
53  
54  
55  
56  
57  
58  
59  
60

For peer review only

### Meta-synthesis analysis

Three main themes emerged: *maintaining self-confidence in early labour*, *withdrawing within as labour intensifies* and *the uniqueness of the birth experience*. A number of subthemes were identified within each of the three main themes, which are listed on Table 2.

TABLE 2. Themes, subthemes and studies contributing/thematic table and studies contributing to each finding

| Main themes                                            | Sub themes                        | Studies             |
|--------------------------------------------------------|-----------------------------------|---------------------|
| <b>Maintaining self-confidence during early labour</b> |                                   | 3,20-22,31, 32,34   |
|                                                        | Experiencing the start of labour  | 3,20-22,31, 32,34   |
|                                                        | Sharing the beginning of labour   | 3,20-22,31, 32,34   |
|                                                        | Keeping life normal               | 3,21, 22,31, 32,34  |
| <b>Withdrawing within as labour intensifies</b>        |                                   | 3, 20-22, ,32-34    |
|                                                        | Accepting the intensity of labour | 3, 20-22, 31, 32,34 |
|                                                        | Going to an inner world           | 3,20-22,31,33       |
|                                                        | Coming back to push               | 3,20-22,32, 34      |
| <b>Uniqueness of the birth experience</b>              |                                   | 3,20-22, 31,32,34   |
|                                                        | Reaching the glorious zenith      | 3,20-22, 31,32,34   |
|                                                        | Meeting the baby                  | 20-22, 31,32,34     |
|                                                        | Empowered self                    | 3,20-22, 31,32, 34  |
| <b>The empowering journey of giving birth</b>          |                                   | 3, 20-22, 31,32, 34 |

## **I. Maintaining self-confidence in early labour**

This theme presents women's experiences when they realised that they were in labour. The accounts indicated that women knew when they were in labour and most preferred to wait calmly for progress, maintaining confidence by keeping a familiar routine and environment.

### ***Experiencing the start of labour***

Women described their feelings when they realised that they were in early labour. Some felt excited and others described a lovely feeling, comparing it to Christmas (13) (p372). A mixture of feelings emanated from the data at this time, including excitement, happiness, calm, sometimes mixed with apprehension and anxiety (3,11,34).

Women found it important to conserve their emotional strength and to maintain a positive attitude (3,11). Some described being happy with staying in their own home, and felt it was important to keep calm:

*"I felt confident by staying in my own living room" (3, p.724).*

They acknowledged the close and trustful relationships in their network at that time in their life (3,13,31).

*"Thought it was reassuring to be together with family in familiar surroundings" (3, p.724).*

### ***Sharing the beginning of labour***

When women recognised the beginning of labour, they shared it with other women. Usually they called their mother or sister, before calling the midwife or the hospital (12,13). Few asked their midwife to be with them at this point.

*"At 10 o'clock in the morning I called the hospital. Of course, I had talked to my mom first" (3, p. 274).*

They indicated that it was important for them to know their midwife because it gave them confidence and trust (3,12,13,32,34)

### ***Keeping life normal***

The most common behaviour at the onset of labour appeared to be continuing with the usual routine. There were many descriptions of wanting to remain at home, taking a shower, being aware of others' needs (like older children or even pets) and waiting happily. Their own home with their relatives and partners around them (3,11,34) was a tranquil place to be while their contractions were becoming more intense and the pain was increasing (3,11).

*"I was lying all night and with my labour pains and my dog came and lay by my feet...it was an incredible feeling, it was in September, all the apples in the trees...it was all so silent..."* ((31), p. 352).

## **II. Withdrawing within as labour intensifies**

As the labour intensifies, women withdrew into an inner world where time seemed to be suspended. Women described how this inner space allowed them to concentrate on the labouring process, and this facilitated feeling that they could manage. The experience of control was complex and nuanced – for some, the sense of being in control was directed at making all of the decisions and for others, it was achieved by feeling safe enough to hand over control (or guardianship) to the midwife, so that they could retreat into their inner world of labouring.

### ***Accepting the intensity of labour***

When contractions became stronger and pain intensified, women felt the need to be fully focussed on the physical task (13). At this point women really needed to be with safe companions in a protected place. This was the moment to contact the midwife and /or move to the hospital.

*"I've got to be somewhere where I can actually allow myself to feel what I am going through"* ((13), p. 373).

The pain experience was framed by accepting pain as a natural part of childbirth, and this was important for women (3,32). Two key elements in the response to pain were trusting in the body and working with pain (3,11). Mobility was important in this phase, and women needed to move around (32) or submerge themselves in water (33). The following quote is an example of how women framed the pain experience to reduce fear.

*"I don't think it is explained very well what the pain is for. People just get frightened of the pain. If they could see it as something useful...the pain is there so as you can help them out, it's not frightening at all"* (, p.58).

Women described their desire to be in control, but this was different for the individual women. For some, control meant staying on top of things and deciding what they needed, whereas for others, control was the decision to hand over management to the midwives (33).

*"Not having any experience of labour, I needed the midwife to tell me what to do. Because she was in control I felt I was too"* ((33), p. 33).

1  
2  
3  
4 Women expressed their need for a caring approach (3,11,13,33). The support from  
5 midwives helped women to face the vulnerability they experienced during labour.

6 *Knowing the midwives so well makes you feel quite at ease, if you are scared and*  
7 *you haven't got anyone reassuring you, you are just panicking, and it hurts a lot*  
8 *more (34) p 239)*

9 *"You are so incredibly vulnerable and I feel that you have such a need that*  
10 *someone is kind to you and shows you some interest. All your energy goes into giving*  
11 *birth to this child and you simply don't have energy left to argue with someone or*  
12 *make a fuss about something. You almost have to take whatever your surroundings*  
13 *offer you" ((11), p. 52).*

14 *All throughout she said to me: you are coping fine Linda, I felt assured. That was*  
15 *how she was making me feel calm All throughout she said to me: you are coping fine*  
16 *Linda, I felt assured. That was how she was making me feel calm (34) p239)*

17  
18  
19 *-A woman giving birth is perhaps much most sensitive or vulnerable that when she is*  
20 *not in labour. If for example the midwife or member of the staff hurt her in some way*  
21 *or says something inappropriate, then it drastically offsets your labour (11)p52*  
22

23  
24 They also described how important their partner was.

25 *"I felt he was my lifeline, he had the best analgesic effect on me and he did not*  
26 *leave me once" ((31), p. 352).*

27  
28  
29 Sometimes they needed to be alone with their partners yet still able to reach their  
30 midwife whenever they needed (33,34).

31 *"I felt like we were doing it ourselves which was nice. We didn't feel we needed*  
32 *the midwife all the time but she was there if we did" (33)p. 34).*

### 33 34 **Going to an inner world**

35  
36 Women described how they withdrew within themselves to an inner world, where  
37 they focused on the importance of living just in that moment. Words used included  
38 "narrowed", "zone", "faraway place", "another planet" and "private" (11-13,31).

39 *"Nothing else matters and the universe kind of shrinks to this particular, you*  
40 *know this particular job that you have to do which is you know about birthing your*  
41 *baby"((13), p. 373).*

42 *"Like with both my labours, I took myself away, I need not to have people looking*  
43 *at me" ((12), p. 49).*

44  
45  
46 Women described perceptions of an altered or suspended sense of time.

47 *"My sense of time was completely lost, as if I had forgotten it in a drawer at*  
48 *home. It was a very strange feeling. There are a lot of people around you and yet you*  
49 *are in your own world. Even if we were in the same room we were not in the same*  
50 *world..." ((11), p. 52).*

51  
52  
53 Over time as the intensity of the contractions and the pain increased, women  
54 described feelings of fear and desperation (13). Some felt exhausted and deprived of  
55



energy (11,32). The thought that they could not continue any more, expressing fears of death (11).

*"I was so optimistic in the beginning of the latter birth...I had given birth before and I survived...so that you believe you will survive. However, in both births I had this feeling for some time that I would never survive this" ((11), p. 56).*

*"I was requesting for a caesarean, I was requesting for everything! Because I just wanted to get over with it. I just said I was going to die. At one point I felt like I was going to faint and stuff like that. I said: 'Please Sandra, I want pain relief.' I was actually begging her, 'Please, please, please.' I said, 'I'm going to die! I won't be able to do this!'" ((34), p. 239).*

### **Coming back to push**

When starting to push, time was no longer suspended and women became more active (11,13).

*"When I started to push, it was as if a curtain was drawn. A totally different perception, suddenly I was awake, alert and quite aware of timing" ((11), p. 55).*

*"... I was at the top of the mountain when I started to push. And then I had to get down again. And that was it!" ((3), p. 725).*

### **III. Uniqueness of the birth experience**

With the birth of their baby women described relief, joy at meeting their baby, and sense of transformation.

#### **Reaching the glorious zenith**

Directly after birth, women described feelings of pride and joy in achieving and experiencing natural childbirth (11,13,32,34).

*"So I was brave, I was strong!... So I was like, 'Yes, I have done it! Yes, I can do it!' I was so happy. I honestly never had this kind of joy since I was born. I don't know where this joy came from. I don't know how to describe the endless joy that came in me" ((34), p. 239).*

*"What is most prominent in the birth experience as a whole is the sense of victory, the feeling of ecstasy when the baby is born. That feeling is unique, and in the last birth I was without all medication and therefore I could enjoy this feeling much better, well I enjoyed it completely" ((11), p. 57).*

Women described the intensity of their feelings of childbirth as being their greatest, unparalleled achievement.

*"It is an intense experience, a powerful life experience. It is naturally magnificent that you, just to find that you are capable of giving birth, to a child, that you can do it. To be such a perfect being that you can do it...the feeling you get when you get your new born child into your arms naturally is indescribable. It is a feeling you cannot compare with anything else. It is awe inspiring" (11) (p56).*

Women also expressed feelings of spiritual closeness and gratitude.

1  
2  
3  
4 *“I had this holiness, being close to the universe. I feel such gratitude for the*  
5 *possibility to give birth at home” ((31), p. 350).*  
6

7 Some women were also surprised and satisfied how effectively their body had  
8 taken them through the labour (13) and they were proud of how they managed their  
9 pain. This ability to manage labour pain positively influenced their confidence in  
10 becoming a mother (34).

11 *“I can’t really explain. I’m very pleased, very pleased, that I did it naturally. I*  
12 *feel so proud, full of myself, I am very proud to have him naturally. I am very proud*  
13 *even now.”((34), p. 239).*  
14

15 However, as well as being a unique and powerful experience, some women also  
16 expressed a need for a sense of peace, and of routine to ground themselves in the new  
17 reality of motherhood (32).  
18

### 19 **Meeting the baby**

### 20

21 Women described the speed with which they assured themselves that their baby  
22 looked normal.

23 *“I remember particularly that as soon as the baby is born you think incredibly fast*  
24 *and you look incredibly fast whether there are, without all doubts, ten toes and ten*  
25 *finger and everything that is supposed to be in place is there and many other*  
26 *things.”(11)(p56).*  
27  
28  
29

30 Women with other children were impatient for them to meet their new sibling. It  
31 was important for them to involve other family members soon after birth to share this  
32 important moment with them (32).  
33

34 *“As soon as I had the baby I’d had my bath and everything and my mum and*  
35 *everybody arrived...we were all in the garden with the baby” ((32), p. 58).*  
36

37 Women described a sense of being ‘cocooned’ within the family soon after the  
38 baby was born (34) and this was expressed in the manner in which the new baby was  
39 welcomed by hugs, kisses and expressions of love (31).  
40

41 *“By three o’clock everybody had left except for just ourselves, the four of us, the*  
42 *whole family, we were just tucked up across my bed and I think in some ways that*  
43 *was the moment that felt that this is absolutely right, there’s nothing more right in*  
44 *the world. I was just all so peaceful, so ---why would do anything differently kind of*  
45 *feeling to it” (29, p. 58).*  
46

47 The birth of the placenta was only mentioned in one study (19). For some  
48 women, it was anti-climactic after the birth of the baby, while others considered it a  
49 part of the recovery process.  
50

### 51 **Empowered-self**

### 52

### 53

### 54

### 55

### 56

### 57

### 58

### 59

### 60

1  
2  
3  
4 After processing their emotions, women described feeling different. They  
5 absorbed new knowledge and understanding about themselves and incorporated this  
6 into their sense of self. They talked about their birth as an empowering experience (12).

7 *"...I felt I could sense right then, when minutes passed by, I felt that I (tearful)*  
8 *was a little bit different"* ((11), p. 56).

9  
10 Women linked their pride about coping with pain to feeling strong and confident  
11 and to a positive start to new motherhood (34).

12 *"When you do that as a woman, you know you can do anything ... I realized how*  
13 *everything else in life is easy, if you can do that (enduring 70 hours of no sleep, wild*  
14 *contractions, etc.) you can do anything. I am sad that so many women don't get to*  
15 *understand this"* ((12), p. 52).

### 16 17 18 **The empowering journey of giving birth**

19 Constructing a line of argument is the next step in a meta-synthesis, based on the  
20 first, second and third order interpretations. For this study, the line of argument  
21 demonstrated 'the empowering journey of giving birth', encompassing the various  
22 emotions, thoughts and behaviours that women experience during labour.

23  
24 Women's psychological journey originated with telling other women from their  
25 social network that labour had started, while staying cocooned in a familiar  
26 environment. Most women focused on maintaining self-confidence at the start of labour  
27 and tended to withdraw into an inner world as labour became more intense. As birth  
28 progressed women experienced an altered state of consciousness including a change in  
29 time perception and intense feelings such as fear of dying. Women described various  
30 ways of coping with the pain and keeping control, which paradoxically, included  
31 releasing control to the midwife where appropriate. With the urge to push, women felt  
32 that once again they became alert and more active. Immediately after the baby was born,  
33 feelings of joy and pride were predominant. The journey through childbirth meant a  
34 growth in personal strength. Some women described themselves as a changed person in  
35 the sense that they felt stronger, empowered, and ready to meet the demands of the  
36 newborn.  
37  
38

### 39 **DISCUSSION**

40 Our study offers new insights into women's psychological experience of  
41 physiologic childbirth as a meta-synthesis on this topic has not been previously  
42 reported. We created a model of the emerging psychological pattern of this journey that  
43 is designated in terms of emotions and behaviours. Women described birth as a  
44 challenging but predominantly positive experience which they were able to overcome  
45 with their own coping resources and the help of others. For them, this resulted in  
46 feelings of strength to face a new episode in their life with their family. Our findings  
47 confirm our main hypothesis: there is a common psychological experience of  
48 physiological labour. As far as we are aware, this has not previously been reported  
49 using womens accounts as primary data. Our findings suggest that birth is just as much  
50 a psychological journey as a physical one.  
51  
52

53 Although the whole event does not seem to have been described before on the  
54 basis of qualitative evidence, elements of our findings are coherent with those from  
55  
56  
57  
58  
59

1  
2  
3  
4 other studies. The preference for familiarity of environment and people at the start of  
5 birth (35), the altered state of consciousness (36,37), the different time perception (38-  
6 40), the empowerment (6,41,42) and change (37,43) that come with childbirth have  
7 previously been described.

8 In our meta-synthesis, overall women expressed confidence in their capacity to  
9 give birth and to trust in themselves and in the process, despite some apprehension as  
10 labour began, and some concerns, including fear of death, during the most intensive  
11 stages of labour. Positive perceptions of their own coping strategies and confidence in  
12 their ability to go through birth were linked to women's positive experience of birth  
13 (44).

14 Women's psychological experience of physiological childbirth is strongly  
15 influenced by the people present at their birth. Women indicated that close relatives,  
16 mostly their partner and mother, as well as care providers were highly relevant for the  
17 way women experienced their birthing process. Women described the presence of their  
18 partner as the person with whom they most closely shared their experience and relied on  
19 for support, confirming that human birth is a social event (45). This is consistent with  
20 other studies that emphasized the decisive contribution partners can make to feelings of  
21 trust (46,47) and the woman's wish for a physiological birth (48).

22 Women indicated the midwife's presence as being critically important. At the  
23 beginning of the labour, women tended to want to be alone and at a distance from the  
24 midwife, but, as labour intensified, they wanted the midwife to be more visible and  
25 present while supporting the woman's control, or taking control if women wanted to  
26 hand it over. Control was a key feature in our study. Over the years various researchers  
27 identified different internal and external dimensions of control (49,50). Women's  
28 internal control includes a sense of self-control, such as thoughts, emotions, behaviours  
29 and coping with labour pain. External control is described as the woman's involvement  
30 in what is happening during birth, understanding what care providers are doing, and  
31 having an influence on the decisions. What seems important to women is not so much  
32 'having control', but rather the affective component of control, which is the 'feeling' of  
33 having influence (10), being able to have a say in what happens and having caregivers  
34 who are responsive to expressed wishes. Women's external control also seemed to arise  
35 from feeling that they were informed and could challenge decisions if the need arose  
36 (49).

37 Mixed feelings, both positive and negative were expressed regarding labour  
38 pain, and this is similar to several studies (51). Women experienced pain as meaningful  
39 in relation to their baby. They recognised its intensity but reframed it positively. This  
40 was also the case for other feelings that are usually interpreted negatively: (being  
41 exhausted, feeling overwhelmed and fear of dying) that were referred to in relation to  
42 specific moments of the labour and birth, but not in the global psychological evaluation  
43 of the experience once it was over. Pain and coping with pain also contributed to  
44 gaining strength to cope with the demands of parenthood. Berentson-Shaw et al. (2009)  
45 indicated that stronger self-efficacy during birth explains a lower level of pain (44).  
46 Rijnders et al. (2008) showed that women who felt unsatisfied about their coping with  
47 pain had more negative emotions about their birth (52).

1  
2  
3  
4 What this meta-synthesis demonstrates is the enormous importance of having  
5 maternity care providers, including midwives, at the birth that are compassionate and  
6 support women to keep a sense of control that is adjusted to their personal needs and  
7 wishes. Care providers can strengthen women's sense of coherence in offering them  
8 emotional support, stimulating trust and confidence, and supporting meaningful others  
9 to be there during the birthing process. Labouring women need to be able to create a  
10 trustful bond with the midwives and obstetricians attending them that offers reassurance  
11 and enables them to feel in control. It may be that women are more likely to experience  
12 a psychologically positive physiological birth when they feel that a supportive and  
13 compassionate companion or health care provider (in the case of the included studies, a  
14 midwife) is by their side, and is very sensitive and attentive to their cues. This includes  
15 effective responses when the woman needs them, and simple encouragement,  
16 information or support to reassure them that what is happening to them is normal. Such  
17 support may enable women to trust that they are safe to focus inwards which facilitates  
18 the release of hormones and enables the maternal behaviours that are essential to  
19 progress a physiological labour and birth. Midwives and other caregivers, including  
20 obstetricians, can facilitate this process by demonstrating empathy, compassion and  
21 supporting a woman's belief in her own ability to birth. These are key skills and  
22 competencies identified in midwifery-led care, recommended to be implemented  
23 worldwide (53). These affective skills should be included in midwifery, nursing and  
24 medical education so that all caregivers have the same expertise in the emotional care of  
25 women during birth.  
26  
27

28  
29 Most women in this synthesis indicated that, for them, birth was an enriching  
30 experience that gave them confidence in their own strength to face the challenges of  
31 motherhood. These emotions may be quite different when women are confronted with  
32 unexpected complications during childbirth, such as an emergency referral to obstetric  
33 care, an assisted vaginal birth, or an unplanned caesarian section, which tend to be  
34 associated with more negative emotions (54,55). Some women experience grief  
35 following a traumatic birth (which could include a birth without interventions,  
36 especially where women feel discounted, or actively abused). This grieving may well  
37 be the mourning over the loss of the experience which contributes to feelings of  
38 empowerment (56).  
39

40  
41 This study has several limitations. Close to half of the women in the sample had  
42 a home birth (39 of the 94 women). Women wishing a home birth seem to have less  
43 worries about health issues or fear of childbirth, and a greater desire for personal  
44 autonomy (57). Women planning a midwife-led birth also have lower rates of  
45 interventions which is also linked to positive experiences in birth (58).  
46

47 The studies included in this meta-synthesis were from high income countries.  
48 The experiences of women in places with low-resourced maternity care systems may be  
49 different. Our sample was small and we lacked information on women's parity,  
50 preparation for birth, specific details of supporting professionals, partners and  
51 significant others which can be of major influence on women's experience of childbirth.

52 Further research is needed in women from different cultural backgrounds.  
53 Additionally, it is of great importance to gain insight into the psychological experience  
54 of birth in women with complications during pregnancy or childbirth. As childbirth is a  
55 neurobiological event directed by neurohormones produced both by the maternal and  
56  
57  
58  
59

fetal brain (7), further research needs to address the interrelationship between neurohormones, psychological experience and physiological labour and birth (59,60).

Positive, physiological labour and birth can be a salutogenic event, from a mental health perspective, as well as in terms of physical wellbeing. The findings challenge the biomedical 'stages of labour' discourse and will help increase awareness of the importance of optimising physiological birth as far as possible, to enhance maternal mental health. The benefits of this process can be maximised through physical, emotional and social support for women, enhancing their belief in their ability to birth and not disturbing physiology unless it is necessary.

## CONCLUSIONS

Giving birth physiologically in the context of supportive, empathic caregivers, is a psychological journey that seems to generate a sense of empowerment in the transition to motherhood. The benefits of this process can be maximised through physical, emotional and social support for women, enhancing their belief in their ability to birth without disturbing physiology unless there is a compelling need. Health care professionals need to understand the empowering effects of the psychological experience of physiological childbirth. Further research to validate the results from this study is necessary.

## CONTRIBUTOR SHIP STATEMENT

All authors conceived and designed the study. Marianne Nieuwenhuijze and Patricia Leahy Warren organised and conducted the search. Ibone Olza, Patricia Leahy-Warren, Yael Benyamini, Marianne Nieuwenhuijze, Esther Crespo, Andria Spyridou, Maria Kazmierczak, Lea Takacs, Margaret Murphy and Sia Jonsdottir participated in the selection of the relevant articles. Ibone Olza and Esther Crespo Mirasol performed the quality assessment of the studies. Ibone Olza did the data extraction from the studies and drafted the manuscript. Ibone Olza, Patricia Leahy-Warren, Yael Benyamini, Marianne Nieuwenhuijze, Andria Spyridou, Maria Kazmierczak, Sia Jonsdottir, Inga Karlsdottir, Priscilla Hall and Soo Down interpreted the results, critically revised the manuscript for important intellectual content, and contributed to and approved the final version. Marianne Nieuwenhuijze, Soo Downe and Patricia Leahy Warren supervised the project. Yael Benyamini, Priscilla J.Hall, Soo Downe, Maria Kasmierczak, Patricia Leahy-Warren, Marianne Nieuwenhuijze and Ibone Olza made the changes and corrections suggested by the reviewers.

**Competing interests statement: None**

**Data Sharing Statement: Additional unpublished data only available to authors.**

**Source of support:** EU COST ACTION IS 1405 BIRTH: BUILDING INTRAPARTUM RESEARCH THROUGH HEALTH  
([http://www.cost.eu/COST\\_Actions/isch/IS1405](http://www.cost.eu/COST_Actions/isch/IS1405))

**REFERENCES**

- (1) Held V. Birth and death. *Ethics* 1989;99(2 (Jan)):362-388.
- (2) Simkin P. Just another day in a woman's life? Nature and consistency of women's long-term memories of their first birth experiences... part 2. *Birth* 1992;19(2):81-18p.
- (3) Aune I, Marit Torvik H, Selboe ST, Skogas AK, Persen J, Dahlberg U. Promoting a normal birth and a positive birth experience - Norwegian women's perspectives. *Midwifery* 2015 Jul;31(7):721-727.
- (4) Elmir R, Schmied V, Wilkes L, Jackson D. Women's perceptions and experiences of a traumatic birth: a meta-ethnography. *J Adv Nurs* 2010 Oct;66(10):2142-2153.
- (5) McKenzie-McHarg K, Ayers S, Ford E, Horsch A, Jomeen J, Sawyer A, et al. Post-traumatic stress disorder following childbirth: an update of current issues and recommendations for future research. *Journal of Reproductive and Infant Psychology* 2015 May 27;33(3):219-237.
- (6) Callister LC. Making meaning: women's birth narratives. *J Obstet Gynecol Neonatal Nurs* 2004;33(4):508-518.
- (7) Buckley SJ. Executive Summary of Hormonal Physiology of Childbearing: Evidence and Implications for Women, Babies, and Maternity Care. *J Perinat Educ* 2015;24(3):145-153.
- (8) Karlsdottir SI, Sveinsdottir H, Kristjansdottir H, Aspelund T, Olafsdottir OA. Predictors of women's positive childbirth pain experience: Findings from an Icelandic national study. *Women Birth* 2017 September 21.
- (9) Nieuwenhuijze M, Low LK. Facilitating women's choice in maternity care. *J Clin Ethics* 2013;24(3):276-282.
- (10) Meyer S. Control in childbirth: a concept analysis and synthesis. *J Adv Nurs* 2013 Jan;69(1):218-228.
- (11) Beck CT. Birth trauma: in the eye of the beholder. *Nurs Res* 2004;53(1):28-35.
- (12) Thomson G, Downe S. Widening the trauma discourse: the link between childbirth and experiences of abuse. *J Psychosom Obstet Gynaecol* 2008 Dec;29(4):268-273.
- (13) Sadler M, Santos MJ, Ruiz-Berdun D, Rojas GL, Skoko E, Gillen P, et al. Moving beyond disrespect and abuse: addressing the structural dimensions of obstetric violence. *Reprod Health Matters* 2016 May;24(47):47-55.

- 1  
2  
3  
4 (14) Lukasse M, Schroll AM, Karro H, Schei B, Steingrimsdottir T, Van Parys AS, et  
5 al. Prevalence of experienced abuse in healthcare and associated obstetric characteristics  
6 in six European countries. *Acta Obstet Gynecol Scand* 2015 Jan 28.
- 7  
8 (15) World Health Organization. WHO recommendations: intrapartum care for a  
9 positive childbirth experience. WHO 2018.
- 10  
11 (16) Declercq E, Young R, Cabral H, Ecker J. Is a Rising Cesarean Delivery Rate  
12 Inevitable? Trends in Industrialized Countries, 1987 to 2007. *Birth* 2011;38(2):99-104.
- 13  
14 (17) Macfarlane AJ, Blondel B, Mohangoo AD, Cuttini M, Nijhuis J, Novak Z, et al.  
15 Wide differences in mode of delivery within Europe: risk-stratified analyses of  
16 aggregated routine data from the Euro-Peristat study. *BJOG* 2016 Mar;123(4):559-568.
- 17  
18 (18) Friedman E. The graphic analysis of labor. *Am J Obstet Gynecol* 1954  
19 Dec;68(6):1568-1575.
- 20  
21 (19) Dixon L, Skinner J, Foureur M. Women's perspectives of the stages and phases of  
22 labour. *Midwifery* 2013 Jan;29(1):10-17.
- 23  
24 (20) Halldorsdottir S, Karlsdottir SI. Journeying through labour and delivery:  
25 perceptions of women who have given birth. *Midwifery* 1996 Jun;12(2):48-61.
- 26  
27 (21) Reed R, Barnes M, Rowe J. Women's Experience of Birth: Childbirth as a Rite of  
28 Passage. *International Journal of Childbirth* 2016;6(1):46-56.
- 29  
30 (22) Dixon L, Skinner J, Foureur M. The emotional journey of labour-women's  
31 perspectives of the experience of labour moving towards birth. *Midwifery* 2014  
32 Mar;30(3):371-377.
- 33  
34 (23) Barnett-Page E, Thomas J. Methods for the synthesis of qualitative research: a  
35 critical review. *BMC Med Res Methodol* 2009 Aug 11;9:59.
- 36  
37 (24) Carroll C. Qualitative evidence synthesis to improve implementation of clinical  
38 guidelines. *BMJ* 2017;356.
- 39  
40 (25) Noblit G, Hare R. *Meta-ethnography: synthesizing qualitative studies*. Newbury  
41 Park: SAGE; 1998.
- 42  
43 (26) Moher D, Liberati A, Tetzlaff J, Altman DG, PRISMA Group. Preferred reporting  
44 items for systematic reviews and meta-analyses: the PRISMA statement. *Int J Surg*  
45 2010;8(5):336-341.
- 46  
47 (27) Leahy-Warren P, Nieuwenhuijze M, Kazmierczak M, Benyamini Y, Murphy M,  
48 Crespo-Mirasol E, et al. The Psychological Experience of Physiological Childbirth: a  
49 Protocol for a Systematic Review of Qualitative Studies. *International Journal of*  
50 *Childbirth* 2017;7(2):101-109.
- 51  
52  
53  
54  
55  
56  
57  
58  
59  
60



- 1  
2  
3  
4 (28) CASP. Critical Appraisal Skills Programme (CASP). (Qualitative checklist).  
5 Available at: <http://www.casp-uk.net/casp-tools-checklists>. Accessed OCTOBER, 2017.  
6
- 7 (29) Tong A, Sainsbury P, Craig J. Consolidated criteria for reporting qualitative  
8 research (COREQ): a 32-item checklist for interviews and focus groups. *Int J Qual*  
9 *Health Care* 2007 Dec;19(6):349-357.  
10
- 11 (30) France EF, Wells M, Lang H, Williams B. Why, when and how to update a meta-  
12 ethnography qualitative synthesis. *Syst Rev* 2016 Mar 15;5:44.  
13
- 14 (31) Sjoblom I, Nordstrom B, Edberg AK. A qualitative study of women's experiences  
15 of home birth in Sweden. *Midwifery* 2006 Dec;22(4):348-355.  
16
- 17 (32) Ng M, Sinclair M. Women's experience of planned home birth: a  
18 phenomenological study. *RCM Midwives* 2002;5(2):56-59.  
19
- 20 (33) Hall SM, Holloway IM. Staying in control: women's experiences of labour in  
21 water. *Midwifery* 1998 Mar;14(1):30-36.  
22
- 23 (34) Leap N, Sandall J, Buckland S, Huber U. Journey to confidence: women's  
24 experiences of pain in labour and relational continuity of care. *J Midwifery Womens*  
25 *Health* 2010;55(3):234-242.  
26
- 27 (35) Carlsson I. Being in a safe and thus secure place, the core of early labour: A  
28 secondary analysis in a Swedish context. *International journal of qualitative studies on*  
29 *health and well-being* 2016;11(1):30230-8.  
30
- 31 (36) Machin D, Scamell M. The experience of labour: using ethnography to explore the  
32 irresistible nature of the bio-medical metaphor during labour. *Midwifery* 1997  
33 Jun;13(2):78-84.  
34
- 35 (37) Parratt J. The impact of childbirth experiences on women's sense of self: a review  
36 of the literature. *Aust J Midwifery* 2002;15(4):10-16.  
37
- 38 (38) Beck CT. Women's temporal experiences during the delivery process: a  
39 phenomenological study. *Int J Nurs Stud* 1994 Jun;31(3):245-252.  
40
- 41 (39) Simonds W. Watching the clock: keeping time during pregnancy, birth, and  
42 postpartum experiences. *Soc Sci Med* 2002 Aug;55(4):559-570.  
43
- 44 (40) Maher JM. Progressing through labour and delivery: Birth time and women's  
45 experiences. *Women's Studies International Forum* 2008;31(2):192-137.  
46
- 47 (41) Johnson TR, Callister LC, Freeborn DS, Beckstrand RL, Huender K. Dutch  
48 women's perceptions of childbirth in the Netherlands. *MCN Am J Matern Child Nurs*  
49 *2007;32(3):170-177.*  
50  
51  
52  
53  
54  
55  
56  
57  
58  
59  
60

- 1  
2  
3  
4 (42) Lindgren H, Erlandsson K. Women's experiences of empowerment in a planned  
5 home birth: a Swedish population-based study. *Birth* 2010 Dec;37(4):309-317.  
6  
7 (43) Lundgren I. Swedish women's experience of childbirth 2 years after birth.  
8 *Midwifery* 2005 Dec;21(4):346-354.  
9  
10 (44) Berentson-Shaw J, Scott KM, Jose PE. Do self- efficacy beliefs predict the  
11 primiparous labour and birth experience? A longitudinal study. *Journal of Reproductive*  
12 *and Infant Psychology* 2009;27(4):357-373.  
13  
14 (45) Rosenberg K, Trevathan W. Birth, obstetrics and human evolution. *BJOG* 2002  
15 Nov;109(11):1199-1206.  
16  
17 (46) Lundgren I, Karlsdottir SI, Bondas T. Long-term memories and experiences of  
18 childbirth in a Nordic context—a secondary analysis. *International Journal of*  
19 *Qualitative Studies on Health and Well-being* 2009;4(2):115-128.  
20  
21 (47) Howarth AM, Swain N, Treharne GJ. Taking personal responsibility for well-being  
22 increases birth satisfaction of first time mothers. *J Health Psychol* 2011;16(8):1221-  
23 1230.  
24  
25 (48) Kringeland T, Daltveit AK, Møller A. How Does Preference for Natural Childbirth  
26 Relate to the Actual Mode of Delivery? A Population-based Cohort Study from  
27 Norway. *Birth* 2010;37(1):21-27.  
28  
29 (49) Green JM, Baston HA. Feeling in control during labor: concepts, correlates, and  
30 consequences. *Birth* 2003 Dec;30(4):235-247.  
31  
32 (50) Ford E, Ayers S. Stressful events and support during birth: the effect on anxiety,  
33 mood and perceived control. *J Anxiety Disord* 2009 Mar;23(2):260-268.  
34  
35 (51) Whitburn LY, Jones LE, Davey M, McDonald S. The nature of labour pain: An  
36 updated review of the literature. *Women and Birth* 2018 April 22,.  
37  
38 (52) Rijnders M, Baston H, Schonbeck Y, van der Pal K, Prins M, Green J, et al.  
39 Perinatal factors related to negative or positive recall of birth experience in women 3  
40 years postpartum in the Netherlands. *Birth* 2008 Jun;35(2):107-116.  
41  
42 (53) Sandall J, Soltani H, Gates S, Shennan A, Devane D. Midwife-led continuity  
43 models versus other models of care for childbearing women. *Cochrane Database Syst*  
44 *Rev* 2016 Apr 28;4:CD004667.  
45  
46 (54) Handelzalts JE, Waldman Peyser A, Krissi H, Levy S, Wiznitzer A, Peled Y.  
47 Indications for Emergency Intervention, Mode of Delivery, and the Childbirth  
48 Experience. *PLoS One* 2017 Jan 3;12(1):e0169132.  
49  
50  
51  
52  
53  
54  
55  
56  
57  
58  
59  
60

1  
2  
3  
4 (55) Henriksen L, Grimsrud E, Schei B, Lukasse M, Bidens Study Group. Factors  
5 related to a negative birth experience - A mixed methods study. *Midwifery* 2017  
6 Aug;51:33-39.  
7

8 (56) Bell AF, Andersson E. The birth experience and women's postnatal depression: A  
9 systematic review. *Midwifery* 2016 August 01;39:112-123.  
10

11 (57) van Haaren-Ten Haken T, Hendrix M, Nieuwenhuijze M, Bude L, de Vries R,  
12 Nijhuis J. Preferred place of birth: characteristics and motives of low-risk nulliparous  
13 women in the Netherlands. *Midwifery* 2012 Oct;28(5):609-618.  
14  
15

16 (58) Maassen MS, Hendrix MJ, Van Vugt HC, Veersema S, Smits F, Nijhuis JG.  
17 Operative deliveries in low-risk pregnancies in The Netherlands: primary versus  
18 secondary care. *Birth* 2008 December 01;35(4):277-282.  
19

20 (59) Dixon L, Skinner J, Foureur M. The emotional and hormonal pathways of labour  
21 and birth: integrating mind, body and behaviour. *New Zealand College of Midwives*  
22 *Journal* 2013;48(1):15-23.  
23  
24

25 (60) Olza-Fernandez I, Marin Gabriel MA, Gil-Sanchez A, Garcia-Segura LM, Arevalo  
26 MA. Neuroendocrinology of childbirth and mother-child attachment: the basis of an  
27 etiopathogenic model of perinatal neurobiological disorders. *Front Neuroendocrinol*  
28 2014 Oct;35(4):459-472.  
29  
30  
31  
32  
33  
34  
35  
36  
37  
38  
39  
40  
41  
42  
43

#### 44 **Figure legends:**

45 Figure 1. Flow chart

46 Table 1. Characteristics of selected studies

47 Table 2. Themes, subthemes and studies contributing/thematic table and studies  
48 contributing to each finding  
49

50 Appendix 1. Search Terms

51 Supplementary File: CASP and COREQ tables  
52  
53  
54  
55  
56  
57  
58  
59  
60

|                                                                                                                                                                                       | AND |                                                                                                                                                                                                                                                                                                                       | AND |                                                                                                                                                           | AND |                                                                                                                                                                                                              | AND |                                                                                                                                                                                                                                                                       |
|---------------------------------------------------------------------------------------------------------------------------------------------------------------------------------------|-----|-----------------------------------------------------------------------------------------------------------------------------------------------------------------------------------------------------------------------------------------------------------------------------------------------------------------------|-----|-----------------------------------------------------------------------------------------------------------------------------------------------------------|-----|--------------------------------------------------------------------------------------------------------------------------------------------------------------------------------------------------------------|-----|-----------------------------------------------------------------------------------------------------------------------------------------------------------------------------------------------------------------------------------------------------------------------|
| woman                                                                                                                                                                                 |     | experience                                                                                                                                                                                                                                                                                                            |     | normal                                                                                                                                                    |     | childbirth                                                                                                                                                                                                   |     | qualitative design                                                                                                                                                                                                                                                    |
| <ul style="list-style-type: none"> <li>• wom* OR</li> <li>mother* OR</li> <li>maternal* OR</li> <li>primip* OR</li> <li>multip* OR</li> <li>paturient* OR</li> <li>female*</li> </ul> |     | <ul style="list-style-type: none"> <li>• experienc* OR</li> <li>percept* OR</li> <li>emotion* OR</li> <li>thought* OR</li> <li>feeling* OR</li> <li>view* OR</li> <li>opinion* OR</li> <li>recall* OR</li> <li>memor* OR</li> <li>satisfact* OR</li> <li>cognit* OR</li> <li>behavio* OR</li> <li>insight*</li> </ul> |     | <ul style="list-style-type: none"> <li>• normal OR</li> <li>natural* OR</li> <li>uncomplicat*</li> <li>OR undistrurb*</li> <li>OR physiologic*</li> </ul> |     | <ul style="list-style-type: none"> <li>• childbirth OR</li> <li>"child birth" OR</li> <li>child-birth OR</li> <li>birth* OR labour</li> <li>OR labor OR</li> <li>delivery OR</li> <li>intrapartum</li> </ul> |     | <ul style="list-style-type: none"> <li>• qualit* OR</li> <li>interview* OR</li> <li>narrat* OR</li> <li>synthes* OR</li> <li>"focus group*"</li> <li>OR ethnograph*</li> <li>OR "grounded</li> <li>theory" OR</li> <li>phenomenolog*</li> <li>OR discourse</li> </ul> |

or peer review only

CASP ASSESSMENT.

| PAPER                                 | 1. Aims | 2. Methodology | 3. Research design | 4. Recruitment | 5. Data collection | 6. Researcher/participant | 7. Ethical issues | 8. Data analysis | 9. Findings | 10. Valuable |
|---------------------------------------|---------|----------------|--------------------|----------------|--------------------|---------------------------|-------------------|------------------|-------------|--------------|
| 1. Aune et al, 2015                   | YES     | YES            | YES                | YES            | YES                | YES                       | YES               | YES              | YES         | EXCELLENT    |
| 2. Dixon et al, 2014                  | YES     | YES            | YES                | YES            | YES                | YES                       | YES               | YES              | YES         | EXCELLENT    |
| 3. Hall SM & Holloway, 1998           | YES     | YES            | YES                | YES            | YES                | YES                       | YES               | YES              | YES         | GOOD         |
| 4. Halldorsdottir & Karlsdottir, 1996 | YES     | YES            | YES                | YES            | YES                | YES                       | YES               | YES              | YES         | EXCELLENT    |
| 5. Leap, 2010                         | YES     | YES            | YES                | YES            | YES                | YES                       | YES               | YES              | YES         | GOOD         |
| 6 Ng M & Sinclair M, 2002             | YES     | YES            | YES                | YES            | YES                | YES                       | YES               | YES              | YES         | GOOD         |
| 7. Reed et al, 2016                   | YES     | YES            | YES                | YES            | YES                | YES                       | YES               | YES              | YES         | EXCELLENT    |
| 8. Sjoblom et al, 2006                | YES     | YES            | YES                | YES            | YES                | YES                       | YES               | YES              | YES         | GOOD         |

CORE-Q TABLE Comprehensiveness of reporting assessment (consolidated criteria for reporting qualitative research checklist)

| 1 Aune et al. 2015 | 2 Dixon et al. 2014 | 3 Hall SM & Holloway IM. 1998 | 4 Halldorsdottir S & Karlsdottir SL. 1996 | 5 Leap et al. 2010 | 6 Ng M & Sinclair M. 2002 | 7 Reed et al. 2016 | 8 Sjoblom I et al. 2006 |
|--------------------|---------------------|-------------------------------|-------------------------------------------|--------------------|---------------------------|--------------------|-------------------------|
|--------------------|---------------------|-------------------------------|-------------------------------------------|--------------------|---------------------------|--------------------|-------------------------|

| Reporting criteria                                   | Studies reporting each criterion |
|------------------------------------------------------|----------------------------------|
| Characteristics of research team:                    |                                  |
| - Interviewer or facilitator identified              | 4, 5, 7, 8                       |
| - Credentials                                        | 1, 2, 3, 4, 5, 6, 7, 8           |
| - Occupation                                         | 1, 2, 3, 4, 5, 6, 7, 8           |
| - Sex                                                | 1, 2, 3, 4, 5, 6, 7, 8           |
| - Experience and training                            | 1, 2, 3, 4, 5, 6, 7, 8           |
| Relationship with participants:                      |                                  |
| - Relationship established before study started      | 7                                |
| - Participant knowledge of interviewer               | 5, 8                             |
| Methodological theory identified                     | 1, 2, 3, 4, 5, 6, 7, 8           |
| Participant selection:                               |                                  |
| - Sampling method (for example, snowball, purposive) | 1, 2, 3, 4, 5, 6, 7, 8           |
| - Method of approach                                 | 1, 2, 3, 4, 5, 6, 7, 8           |
| - Sample size                                        | 1, 2, 3, 4, 5, 6, 7, 8           |
| - Number or reasons for non-participation            | 8                                |
| Setting:                                             |                                  |
| - Setting of data collection                         | 1, 3, 4, 5, 6, 7, 8              |
| - Presence of non-participants                       | 3                                |
| - Description of sample                              | 1, 2, 3, 4, 5, 6, 7, 8           |
| Data collection:                                     |                                  |
| - Interview guide                                    | 1, 2, 6, 8                       |
| - Repeat interviews                                  | --                               |
| - Audio or visual recording                          | 1, 2, 3, 4, 5, 6, 7, 8           |
| - Field notes                                        | 4, 5, 7, 8                       |
| - Duration                                           | 1, 5, 7, 8                       |
| - Data saturation                                    | 1, 2, 3, 6, 7, 8                 |
| - Transcripts returned to participants               | 2, 4, 7                          |
| Data analysis:                                       |                                  |
| - Number of data coders                              | 2, 3, 4, 5, 6, 7, 8              |
| - Description of coding tree                         | 1, 2, 3, 4, 5, 6, 7, 8           |
| - Derivation of themes                               | 1, 2, 3, 4, 5, 6, 7, 8           |
| - Use of software                                    | 7                                |
| - Participants' feedback or member checking          | 2, 4, 7                          |
| Reporting:                                           |                                  |
| - Participant quotations provided                    | 1, 2, 3, 4, 5, 6, 7, 8           |
| - Data and findings consistent                       | 1, 2, 3, 4, 5, 6, 7, 8           |
| - Clarity of major themes                            | 1, 2, 3, 4, 5, 6, 7, 8           |
| - Clarity of minor themes                            | 1, 2, 3, 4, 5, 6, 7, 8           |

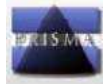

# PRISMA 2009 Checklist

| Section/topic                      | #  | Checklist item                                                                                                                                                                                                                                                                                              | Reported on page # |
|------------------------------------|----|-------------------------------------------------------------------------------------------------------------------------------------------------------------------------------------------------------------------------------------------------------------------------------------------------------------|--------------------|
| <b>TITLE</b>                       |    |                                                                                                                                                                                                                                                                                                             |                    |
| Title                              | 1  | Identify the report as a systematic review, meta-analysis, or both.                                                                                                                                                                                                                                         | 1                  |
| <b>ABSTRACT</b>                    |    |                                                                                                                                                                                                                                                                                                             |                    |
| Structured summary                 | 2  | Provide a structured summary including, as applicable: background; objectives; data sources; study eligibility criteria, participants, and interventions; study appraisal and synthesis methods; results; limitations; conclusions and implications of key findings; systematic review registration number. | 4                  |
| <b>INTRODUCTION</b>                |    |                                                                                                                                                                                                                                                                                                             |                    |
| Rationale                          | 3  | Describe the rationale for the review in the context of what is already known.                                                                                                                                                                                                                              | 5                  |
| Objectives                         | 4  | Provide an explicit statement of questions being addressed with reference to participants, interventions, comparisons, outcomes, and study design (PICOS).                                                                                                                                                  | 5                  |
| <b>METHODS</b>                     |    |                                                                                                                                                                                                                                                                                                             |                    |
| Protocol and registration          | 5  | Indicate if a review protocol exists, if and where it can be accessed (e.g., Web address), and, if available, provide registration information including registration number.                                                                                                                               | 6                  |
| Eligibility criteria               | 6  | Specify study characteristics (e.g., PICOS, length of follow-up) and report characteristics (e.g., years considered, language, publication status) used as criteria for eligibility, giving rationale.                                                                                                      | 22                 |
| Information sources                | 7  | Describe all information sources (e.g., databases with dates of coverage, contact with study authors to identify additional studies) in the search and date last searched.                                                                                                                                  | 7                  |
| Search                             | 8  | Present full electronic search strategy for at least one database, including any limits used, such that it could be repeated.                                                                                                                                                                               | 21, 25             |
| Study selection                    | 9  | State the process for selecting studies (i.e., screening, eligibility, included in systematic review, and, if applicable, included in the meta-analysis).                                                                                                                                                   | 7                  |
| Data collection process            | 10 | Describe method of data extraction from reports (e.g., piloted forms, independently, in duplicate) and any processes for obtaining and confirming data from investigators.                                                                                                                                  | 7                  |
| Data items                         | 11 | List and define all variables for which data were sought (e.g., PICOS, funding sources) and any assumptions and simplifications made.                                                                                                                                                                       | 7                  |
| Risk of bias in individual studies | 12 | Describe methods used for assessing risk of bias of individual studies (including specification of whether this was done at the study or outcome level), and how this information is to be used in any data synthesis.                                                                                      | 7                  |
| Summary measures                   | 13 | State the principal summary measures (e.g., risk ratio, difference in means).                                                                                                                                                                                                                               | -                  |
| Synthesis of results               | 14 | Describe the methods of handling data and combining results of studies, if done, including measures of consistency (e.g., $I^2$ ) for each meta-analysis.                                                                                                                                                   | 7                  |

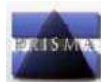

# PRISMA 2009 Checklist

| Section/topic                 | #  | Checklist item                                                                                                                                                                                           | Reported on page # |
|-------------------------------|----|----------------------------------------------------------------------------------------------------------------------------------------------------------------------------------------------------------|--------------------|
| Risk of bias across studies   | 15 | Specify any assessment of risk of bias that may affect the cumulative evidence (e.g., publication bias, selective reporting within studies).                                                             | -                  |
| Additional analyses           | 16 | Describe methods of additional analyses (e.g., sensitivity or subgroup analyses, meta-regression), if done, indicating which were pre-specified.                                                         | 7                  |
| <b>RESULTS</b>                |    |                                                                                                                                                                                                          |                    |
| Study selection               | 17 | Give numbers of studies screened, assessed for eligibility, and included in the review, with reasons for exclusions at each stage, ideally with a flow diagram.                                          | 22                 |
| Study characteristics         | 18 | For each study, present characteristics for which data were extracted (e.g., study size, PICOS, follow-up period) and provide the citations.                                                             | 23                 |
| Risk of bias within studies   | 19 | Present data on risk of bias of each study and, if available, any outcome level assessment (see item 12).                                                                                                | -                  |
| Results of individual studies | 20 | For all outcomes considered (benefits or harms), present, for each study: (a) simple summary data for each intervention group (b) effect estimates and confidence intervals, ideally with a forest plot. | -                  |
| Synthesis of results          | 21 | Present results of each meta-analysis done, including confidence intervals and measures of consistency.                                                                                                  | 8                  |
| Risk of bias across studies   | 22 | Present results of any assessment of risk of bias across studies (see Item 15).                                                                                                                          | -                  |
| Additional analysis           | 23 | Give results of additional analyses, if done (e.g., sensitivity or subgroup analyses, meta-regression [see Item 16]).                                                                                    | -                  |
| <b>DISCUSSION</b>             |    |                                                                                                                                                                                                          |                    |
| Summary of evidence           | 24 | Summarize the main findings including the strength of evidence for each main outcome; consider their relevance to key groups (e.g., healthcare providers, users, and policy makers).                     | 24                 |
| Limitations                   | 25 | Discuss limitations at study and outcome level (e.g., risk of bias), and at review-level (e.g., incomplete retrieval of identified research, reporting bias).                                            | 13                 |
| Conclusions                   | 26 | Provide a general interpretation of the results in the context of other evidence, and implications for future research.                                                                                  | 13                 |
| <b>FUNDING</b>                |    |                                                                                                                                                                                                          |                    |
| Funding                       | 27 | Describe sources of funding for the systematic review and other support (e.g., supply of data); role of funders for the systematic review.                                                               | 7                  |

From: Moher D, Liberati A, Tetzlaff J, Altman DG, The PRISMA Group (2009). Preferred Reporting Items for Systematic Reviews and Meta-Analyses: The PRISMA Statement. PLoS Med 6(7): e1000097. doi:10.1371/journal.pmed1000097

For more information, visit: [www.prisma-statement.org](http://www.prisma-statement.org).
