# Supplementary material for: Women’s psychological experiences of physiological childbirth: a meta-synthesis
Source: PubMed Central journal article supplement — BMJ Open. 2018 Oct 18;8(10):e020347. doi: 10.1136/bmjopen-2017-020347 (PMC6196808; doi:10.1136/bmjopen-2017-020347), 2018-10-18
Supplement: bmjopen-2017-020347supp001.pdf [file bmjopen-2017-020347supp001.pdf]

|                                                                                                                                                                                       | AND |                                                                                                                                                                                                                                                                                                                       | AND |                                                                                                                                                           | AND |                                                                                                                                                                                                              |     |                                                                                                                                                                                                                                                                |
|---------------------------------------------------------------------------------------------------------------------------------------------------------------------------------------|-----|-----------------------------------------------------------------------------------------------------------------------------------------------------------------------------------------------------------------------------------------------------------------------------------------------------------------------|-----|-----------------------------------------------------------------------------------------------------------------------------------------------------------|-----|--------------------------------------------------------------------------------------------------------------------------------------------------------------------------------------------------------------|-----|----------------------------------------------------------------------------------------------------------------------------------------------------------------------------------------------------------------------------------------------------------------|
| woman                                                                                                                                                                                 |     | experience                                                                                                                                                                                                                                                                                                            |     | normal                                                                                                                                                    |     | childbirth                                                                                                                                                                                                   | AND | qualitative design                                                                                                                                                                                                                                             |
| <ul style="list-style-type: none"> <li>• wom* OR</li> <li>mother* OR</li> <li>maternal* OR</li> <li>primip* OR</li> <li>multip* OR</li> <li>paturient* OR</li> <li>female*</li> </ul> |     | <ul style="list-style-type: none"> <li>• experienc* OR</li> <li>percept* OR</li> <li>emotion* OR</li> <li>thought* OR</li> <li>feeling* OR</li> <li>view* OR</li> <li>opinion* OR</li> <li>recall* OR</li> <li>memor* OR</li> <li>satisfact* OR</li> <li>cognit* OR</li> <li>behavio* OR</li> <li>insight*</li> </ul> |     | <ul style="list-style-type: none"> <li>• normal OR</li> <li>natural* OR</li> <li>uncomplicat*</li> <li>OR undistrurb*</li> <li>OR physiologic*</li> </ul> |     | <ul style="list-style-type: none"> <li>• childbirth OR</li> <li>"child birth" OR</li> <li>child-birth OR</li> <li>birth* OR labour</li> <li>OR labor OR</li> <li>delivery OR</li> <li>intrapartum</li> </ul> |     | <ul style="list-style-type: none"> <li>• qualitat* OR</li> <li>interview* OR</li> <li>narrat* OR</li> <li>synthes* OR</li> <li>"focus group*" OR</li> <li>ethnograph*</li> <li>OR "grounded theory" OR</li> <li>phenomenolog*</li> <li>OR discourse</li> </ul> |
