# Supplementary material for: Women’s psychological experiences of physiological childbirth: a meta-synthesis
Source: PubMed Central journal article supplement — BMJ Open. 2018 Oct 18;8(10):e020347. doi: 10.1136/bmjopen-2017-020347 (PMC6196808; doi:10.1136/bmjopen-2017-020347), 2018-10-18
Supplement: bmjopen-2017-020347supp002.pdf [file bmjopen-2017-020347supp002.pdf]

## CASP ASSESSMENT.

| PAPER                                 | 1. Aims | 2. Methodology | 3. Research design | 4. Recruitment | 5. Data collection | 6. Researcher/participant | 7. Ethical issues | 8. Data analysis | 9. Findings | 10. Valuable |
|---------------------------------------|---------|----------------|--------------------|----------------|--------------------|---------------------------|-------------------|------------------|-------------|--------------|
| 1. Aune et al, 2015                   | YES     | YES            | YES                | YES            | YES                | YES                       | YES               | YES              | YES         | EXCELLENT    |
| 2. Dixon et al, 2014                  | YES     | YES            | YES                | YES            | YES                | YES                       | YES               | YES              | YES         | EXCELLENT    |
| 3. Hall SM & Holloway, 1998           | YES     | YES            | YES                | YES            | YES                | YES                       | YES               | YES              | YES         | GOOD         |
| 4. Halldorsdottir & Karlsdottir, 1996 | YES     | YES            | YES                | YES            | YES                | YES                       | YES               | YES              | YES         | EXCELLENT    |
| 5. Leap, 2010                         | YES     | YES            | YES                | YES            | YES                | YES                       | YES               | YES              | YES         | GOOD         |
| 6 Ng M & Sinclair M, 2002             | YES     | YES            | YES                | YES            | YES                | YES                       | YES               | YES              | YES         | GOOD         |
| 7. Reed et al, 2016                   | YES     | YES            | YES                | YES            | YES                | YES                       | YES               | YES              | YES         | EXCELLENT    |
| 8. Sjoblom et al, 2006                | YES     | YES            | YES                | YES            | YES                | YES                       | YES               | YES              | YES         | GOOD         |

CORE-Q TABLE Comprehensiveness of reporting assessment (consolidated criteria for reporting qualitative research checklist)

| 1 Aune et al, 2015 | 2 Dixon et al, 2014 | 3 Hall SM & Holloway IM, 1998 | 4 Halldorsdottir S & Karlsdottir SL, 1996 | 5 Leap et al, 2010 | 6 Ng M & Sinclair M, 2002 | 7 Reed et al, 2016 | 8 Sjoblom I et al, 2006 |
|--------------------|---------------------|-------------------------------|-------------------------------------------|--------------------|---------------------------|--------------------|-------------------------|
|--------------------|---------------------|-------------------------------|-------------------------------------------|--------------------|---------------------------|--------------------|-------------------------|

| Reporting criteria                                   | Studies reporting each criterion |
|------------------------------------------------------|----------------------------------|
| Characteristics of research team:                    |                                  |
| - Interviewer or facilitator identified              | 4, 5, 7, 8                       |
| - Credentials                                        | 1, 2, 3, 4, 5, 6, 7, 8           |
| - Occupation                                         | 1, 2, 3, 4, 5, 6, 7, 8           |
| - Sex                                                | 1, 2, 3, 4, 5, 6, 7, 8           |
| - Experience and training                            | 1, 2, 3, 4, 5, 6, 7, 8           |
| Relationship with participants:                      |                                  |
| - Relationship established before study started      | 7                                |
| - Participant knowledge of interviewer               | 5, 8                             |
| Methodological theory identified                     | 1, 2, 3, 4, 5, 6, 7, 8           |
| Participant selection:                               |                                  |
| - Sampling method (for example, snowball, purposive) | 1, 2, 3, 4, 5, 6, 7, 8           |
| - Method of approach                                 | 1, 2, 3, 4, 5, 6, 7, 8           |
| - Sample size                                        | 1, 2, 3, 4, 5, 6, 7, 8           |
| - Number or reasons for non-participation            | 8                                |
| Setting:                                             |                                  |
| - Setting of data collection                         | 1, 3, 4, 5, 6, 7, 8              |
| - Presence of non-participants                       | 3                                |
| - Description of sample                              | 1, 2, 3, 4, 5, 6, 7, 8           |
| Data collection:                                     |                                  |
| - Interview guide                                    | 1, 2, 6, 8                       |
| - Repeat interviews                                  | --                               |
| - Audio or visual recording                          | 1, 2, 3, 4, 5, 6, 7, 8           |
| - Field notes                                        | 4, 5, 7, 8                       |
| - Duration                                           | 1, 5, 7, 8                       |
| - Data saturation                                    | 1, 2, 3, 6, 7, 8                 |
| - Transcripts returned to participants               | 2, 4, 7                          |
| Data analysis:                                       |                                  |
| - Number of data coders                              | 2, 3, 4, 5, 6, 7, 8              |
| - Description of coding tree                         | 1, 2, 3, 4, 5, 6, 7, 8           |
| - Derivation of themes                               | 1, 2, 3, 4, 5, 6, 7, 8           |
| - Use of software                                    | 7                                |
| - Participants' feedback or member checking          | 2, 4, 7                          |
| Reporting:                                           |                                  |
| - Participant quotations provided                    | 1, 2, 3, 4, 5, 6, 7, 8           |
| - Data and findings consistent                       | 1, 2, 3, 4, 5, 6, 7, 8           |
| - Clarity of major themes                            | 1, 2, 3, 4, 5, 6, 7, 8           |
| - Clarity of minor themes                            | 1, 2, 3, 4, 5, 6, 7, 8           |
